1 **Structural basis to design multi-epitope vaccines against Novel**  
2 **Coronavirus 19 (COVID19) infection, the ongoing pandemic emergency: an**  
3 **in silico approach**

4

5 Sukrit Srivastava<sup>\*a,b</sup>, Sonia Verma<sup>c</sup>, Mohit Kamthania<sup>d</sup>, Rupinder Kaur<sup>e</sup>, Ruchi  
6 Kiran Badyal<sup>f</sup>, Ajay Kumar Saxena<sup>b</sup>, Ho-Joon Shin<sup>g</sup>, Michael Kolbe<sup>h,l</sup>, Kailash C  
7 Pandey<sup>c</sup>

8

9 a Department of Biotechnology, Institute of Bio-Medical Education and  
10 Research, Mangalayatan University, 202146 Aligarh, India.

11 b Molecular Medicine Lab., School of Life Science, Jawaharlal Nehru  
12 University, 110067 New Delhi, India.

13 c Parasite-Host Biology Group, Protein Biochemistry & Engineering Lab,  
14 ICMR-National Institute of Malaria Research, New Delhi, India

15 d Department of Biotechnology, Institute of Applied Medicines and  
16 Research, 201206 Ghaziabad, India.

17 e Department of Chemistry, Guru Nanak Dev University, Amritsar, India

18 f Department of economics, Mangalayata University, India

19 g Department of Microbiology, School of Medicine, Ajou University, South  
20 Korea

21 h Department for Structural Infection Biology, Centre for Structural Systems  
22 Biology (CSSB) & Helmholtz-Centre for Infection Research, Notkestraße  
23 85, 22607 Hamburg, Germany.

24 i Faculty of Mathematics, Informatics and Natural Sciences, University of  
25 Hamburg, Rothenbaumchaussee 19, 20148 Hamburg, Germany.

26

27 \*Correspondence should be addressed to S.S.

28 (sukrit.srivastav@mangalayatan.edu.in; srivastav.sukrit@gmail.com)

29

30 **Abstract**

31

32 The 2019 novel coronavirus (COVID19 / Wuhan coronavirus), officially named as

33 Severe Acute Respiratory Syndrome Coronavirus 2 (SARS-CoV-2), is a positive-

34 sense single-stranded RNA coronavirus. SARS-CoV-2 causes the contagious

35 COVID19 disease also known as 2019-nCoV acute respiratory disease and has  
36 led to the ongoing 2019–20 pandemic COVID19 outbreak. The effective counter  
37 measures against SARS-CoV-2 infection require the design and development of  
38 specific and effective vaccine candidate. In the present study, we have screened  
39 and shortlisted 38 CTL, 33 HTL and 12 B cell epitopes from the eleven Protein  
40 sequences of SARS-CoV-2 by utilizing different in silico tools. The screened  
41 epitopes were further validated for their binding with their respective HLA allele  
42 binders and TAP (Transporter associated with antigen processing) molecule by  
43 molecular docking. The shortlisted screened epitopes were further utilized to  
44 design novel two multi-epitope vaccines (MEVs) composed of CTL, HTL and B  
45 cell epitopes overlaps with potential to elicit humoral as well as cellular immune  
46 response against SARS-CoV-2. To enhance the immune response for our  
47 vaccine design, truncated (residues 10-153) *Onchocerca volvulus* activation-  
48 associated secreted protein-1 (Ov-ASP-1) has been utilized as an adjuvant at N  
49 terminal of both the MEVs. Further molecular models for both the MEVs were  
50 prepared and validated for their stable molecular interactions with Toll-Like  
51 Receptor 3 (TLR 3). The codon-optimized cDNA of both the MEVs were further  
52 analyzed for their potential of high level of expression in a human cell line. The  
53 present study is very significant in terms of molecular designing of prospective  
54 CTL and HTL vaccine against SARS-CoV-2 infection with the potential to elicit  
55 cellular as well as humoral immune response.

56

57 **Key words:** COVID19, Severe Acute Respiratory Syndrome Coronavirus 2

58 (SARS-CoV-2), Coronavirus, Human Transporter associated with antigen  
59 processing (TAP), Toll-Like Receptor (TLR), Epitope, Immunoinformatics,  
60 Molecular Docking, Molecular dynamics simulation, Multi-epitope Vaccine

61

62

63

64

65

66

67

68

69

70

71

72

73

74

75

76

77

78

79

80

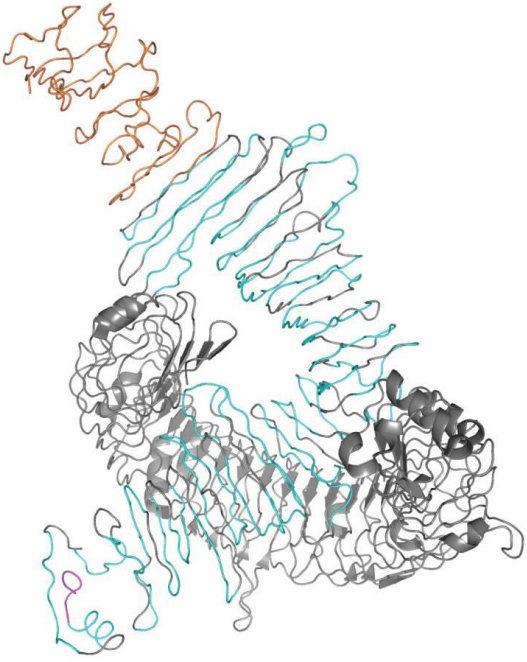

**CTL Multi-epitope COVID19 vaccine**  
**- Toll Like Receptor 3 complex**

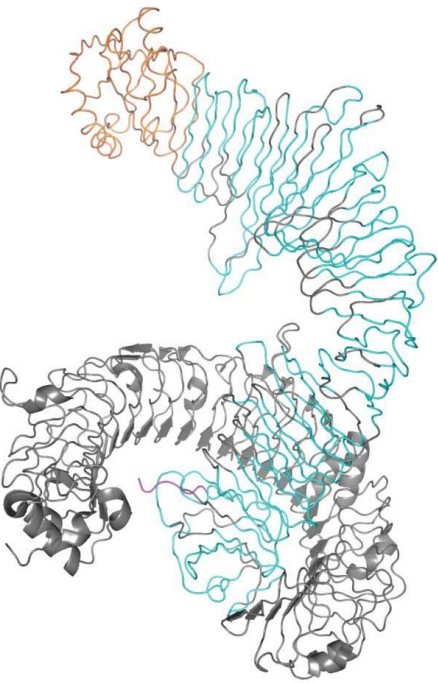

**HTL Multi-epitope COVID19 vaccine**  
**- Toll Like Receptor 3 complex**

81  
82  
83  
84  
85  
86  
87  
88  
89  
90  
91  
92  
93  
94  
95  
96  
97  
98  
99  
100  
101  
102  
103

104 **Graphical abstract:** The designed CTL (Cytotoxic T lymphocyte ) and HTL  
105 (Helper T lymphocyte) multi-epitope vaccines (MEV) against COVID19 infection.  
106 Both the CTL and HTL MEV models show a very stable and well fit  
107 conformational complex formation tendency with the Toll like receptor 3. CTL and  
108 HTL MEVs: *ribbon*; Toll like receptor 3: *gray cartoon*; Adjuvant [truncated  
109 (residues 10-153) Onchocerca volvulus activation-associated secreted protein-1]:  
110 *orange ribbon regions*; Epitopes: *cyan ribbons regions*; 6xHis Tag: *magenta*  
111 *ribbon regions*.

112

113 **Abbreviations:** Antigen-presenting cell (APCs), Codon Adaptation Index (CAI),  
114 Coronavirus ID 19 (COVID19), Coronavirus (CoV), Coverage (Cov), Cryo-  
115 Electron Microscopy (Cryo-EM), Cytotoxic T lymphocyte (CTL), ectodomain  
116 (ECD), Envelope Protein (E Protein), endoplasmic reticulum (ER), European  
117 Bioinformatics Institute (EBI), Nucleocapsid Protein (N Protein), Open reading  
118 Frame (ORF), global distance test (GDT), Grand average of hydropathicity  
119 (GRAVY), root mean square deviation (RMSD), root mean square fluctuation  
120 (RMSF), Surface protein (S Protein), half maximal inhibitory concentration (IC50),  
121 Helper T lymphocyte (HTL), Human Leukocyte Antigen (HLA), Immune Epitope  
122 Database (IEDB), Immuno Polymorphism Database (IPD), Interferon Gamma (IFN-  
123  $\gamma$ ), International ImMunoGeneTics project (IMGT), major histocompatibility  
124 complex (MHC), Membrane Protein (M Protein), Motif-Emerging with  
125 Classes Identification (MERC I), Molecular dynamics simulation (MD simulation)  
126 Multi-epitope Vaccine (MEV), Multiple Sequence Alignment (MSA), non-structural

127 protein (nsp), National Center for Biotechnology Information (NCBI), peptide-  
128 MHC (pMHC), Severe Acute Respiratory Syndrome Coronavirus 2 (SARS-CoV-  
129 2), Stabilization Matrix alignment method (SMM), Transmembrane (TM), Protein  
130 Data Bank (PDB), Qualitative Model Energy ANalysis (QMEAN), root mean  
131 square deviation (RMSD), Support Vector Machine (SVM), Toll-Like Receptor 3  
132 (TLR3), Transporter associated with antigen processing (TAP), un-normalized  
133 global distance test (uGDT), Yet Another Scientific Artificial Reality Application  
134 (YASARA)

135

## 136 **Introduction**

137 The novel coronavirus (COVID19), officially named as Severe Acute Respiratory  
138 Syndrome Coronavirus 2 (SARS-CoV-2) has caused the ongoing outbreak of a  
139 severe form of flu leading to death with a mortality rate of 3.4 %. The SARS-CoV-  
140 2 is a novel coronavirus associated with a respiratory disease initiated from the  
141 Wuhan of Hubei province, China. The disease is highly contagious and has  
142 spread to 182 countries/ Territories since its outbreak in China in December 2019  
143 till 21<sup>st</sup> of March 2020. Worldwide, as of 21<sup>st</sup> March 2020, the total confirmed  
144 cases have been reported to be 2,66,073 and total death count reported is  
145 11,184 (WHO Situation report 21<sup>st</sup> March 2020). Overall the SARS-CoV-2  
146 infection has put a global emergency condition. The economic impact of COVID-  
147 19 is even harsher and has put the world on economic risk. As of 9<sup>th</sup> March, the  
148 downside scenario sees a \$2 trillion shortfall in global income with a \$220 billion  
149 hit to developing countries. The COVID-19 shock will cause a recession in

150 several countries and depress global annual growth this year to 2.5 percent  
151 lower, the recessionary threshold for the world economy (UNCTAD report 9<sup>th</sup>  
152 March 2020).

153 The infection mechanism and pathogenesis of SARS-CoV-2 is largely  
154 unknown yet. The proteome of SARS-CoV-2 is composed of 11 structural and  
155 non-structural proteins. These include polyprotein (ORF1ab), Surface protein (S  
156 Protein), ORF3, Envelope Protein (E Protein), Membrane Protein (M Protein),  
157 ORF6, ORF7a, ORF7b, ORF8, Nucleocapsid Protein (N Protein), and ORF10  
158 (NCBI protein sequence database). The actual function and pathogenic or  
159 proliferative role of these SARS-CoV-2 coronavirus proteins are largely not  
160 known yet.

161 The SARS-CoV-2 coronavirus polyprotein (ORF1ab) with length of 7,096  
162 amino acid (aa) is composed of 16 different expressed protein viz. leader protein  
163 (nsp1, location: 1-180 aa); nsp2 (location: 181-818); nsp3 (former nsp1, carry  
164 conserved domains - N-terminal acidic, predicted phosphoesterase, papain-like  
165 proteinase, Y-domain, transmembrane domain 1 (TM1) and adenosine  
166 diphosphate-ribose 1"-phosphatase, location: 819-2,763); nsp4 (contains  
167 transmembrane domain 2 (TM2), location: 2,764-3,263); 3C-like proteinase  
168 (nsp5, main proteinase, mediates cleavages downstream of nsp4, location:  
169 3,264-3,569); nsp6 (putative transmembrane domain, location: 3,570-3,859);  
170 nsp7 (location: 3,860-3,942); nsp8 (location: 3,943-4,140); nsp9 (ssRNA-binding  
171 protein, location: 4,141-4,253); nsp10 (formerly known as growth-factor-like  
172 protein, location: 4,254-4,392); nsp11 (location: 4,393-4,405); RNA-dependent

173 RNA polymerase (nsp12, location: 4,393-5,324); Helicase (nsp13; zinc-  
174 binding domain, NTPase/helicase domain, RNA 5'-triphosphatase, location:  
175 5,325-5,925); 3'-to-5' exonuclease (nsp14, location: 5,926-6,452); endo RNase  
176 (nsp15, location: 6,453-6,798); and 2'-O-ribose methyltransferase (nsp16;  
177 location: 6,799-7,096).

178 The SARS-CoV-2 coronavirus surface glycoprotein (S Protein) is a  
179 structural protein and acts as spike protein, its location is 21,563-25,384 aa, and  
180 length is 1273 aa); The SARS-CoV-2 coronavirus ORF3a protein has location  
181 25,393-26,220 aa and length 275 aa. The SARS-CoV-2 coronavirus envelope  
182 protein (E Protein) (ORF4) is a structural protein and has location 26,245-26,472  
183 aa and length 75 aa. The SARS-CoV-2 coronavirus membrane glycoprotein (M  
184 Protein) (ORF5) is a structural protein and has location 26,523-27,191aa and  
185 length 222 aa. The SARS-CoV-2 coronavirus ORF6 protein has location 27,202-  
186 27,387 aa and length 61 aa. The SARS-CoV-2 coronavirus ORF7a protein has  
187 location 27,394-27,759 aa and length 121 aa. The SARS-CoV-2 coronavirus  
188 ORF7b protein has location 27,756-27,887 aa and length 43 aa. The SARS-CoV-  
189 2 coronavirus ORF8 protein has location 27,894-28,259 aa and length 121 aa.  
190 The SARS-CoV-2 coronavirus nucleocapsid phosphoprotein (N Protein) (ORF9)  
191 is a structural protein with location 28,274-29,533 aa and has a length of 419 aa.  
192 The SARS-CoV-2 coronavirus ORF10 protein has location 29,558-29,674 aa and  
193 length 38 aa (NCBI protein sequence database).

194 Although the exact mechanism and roles of all the above-mentioned  
195 proteins of SARS-CoV-2 coronavirus proteome are not well known yet, but these



196 proteins could act as potential vaccine candidates against the SARS-CoV-2  
197 coronavirus infection. In the present study, we have screened highly potential  
198 epitopes from all the above-mentioned protein and further, we have also  
199 designed and proposed CTL (Cytotoxic T lymphocyte) and HTL (Helper T  
200 lymphocyte) multi-epitope based vaccine candidates against the SARS-CoV-2  
201 coronavirus infection.

202

### 203 **Methodology**

204 In the present study on SARS-CoV-2 coronavirus, we have screened  
205 potential epitopes and have designed and proposed two multi-epitope vaccines  
206 (MEVs) composed of screened CTL (Cytotoxic T lymphocyte) and HTL (Helper T  
207 lymphocyte) epitopes with overlapping regions of B cell epitopes. Hence the  
208 proposed MEVs are supposed to have the potential to elicit both the humoral  
209 as well as cellular immune response. To enhance immune response, truncated  
210 (residues 10-153) *Onchocerca volvulus* activation-associated secreted protein-1  
211 (Ov-ASP-1) has been utilized as an adjuvant at N-terminal of both the MEVs. The  
212 truncated Ov-ASP-1 was chosen due to its potential to activate antigen-  
213 processing cells (APCs) (MacDonald et al., 2005; Guo et al., 2015; He et al.,  
214 2009). All SARS-CoV-2 coronavirus proteins mentioned in the introduction were  
215 utilized to screen the potential CTL, HTL and B cell epitopes. The screened  
216 epitopes were further studied for overlapping consensus regions amongst them.  
217 The epitopes showing overlapping regions in partial or complete were chosen for  
218 detailed further studies.

219 The chosen CTL and HTL epitopes were analyzed for their molecular  
220 interaction with their respective HLA allele binders. Moreover, the chosen CTL  
221 epitopes were also analyzed for their molecular interaction with TAP (Transporter  
222 associated with antigen processing) transporter cavity to observe their smooth  
223 passage from cytoplasm to endoplasmic reticulum lumen (Oldham et al., 2016;  
224 Abele et al., 2004). The tertiary model for both MEVs were generated and  
225 refined. Both the MEVs models were further utilized to screened B Cell linear and  
226 discontinuous epitopes as well as IFN- $\gamma$  inducing epitopes.

227 The molecular signaling by multiple TLRs, is an essential component of  
228 the innate immune response against SARS-CoV-2 coronavirus. Since the rOv-  
229 ASP-1 primarily binds APCs among human PBMCs and trigger pro-inflammatory  
230 cytokine production via Toll-like receptor 3 (TLR3), hence both the CTL and HTL  
231 MEV models were further analyzed for their molecular interaction with the TLR-3  
232 by molecular docking studies (Antoniou et al., 2003; Delneste et al., 2007; Totura  
233 et al., 2015; Farina et al., 2005). Further, the codon- optimized cDNA of both the  
234 MEVs were analyzed to have a high level of expression in mammalian cell line  
235 (human), which would facilitate *in-vivo* expression, experimentation and trials  
236 (Fig.1).

237

238

239

240

241

242 **Figure 1.** Workflow chart.

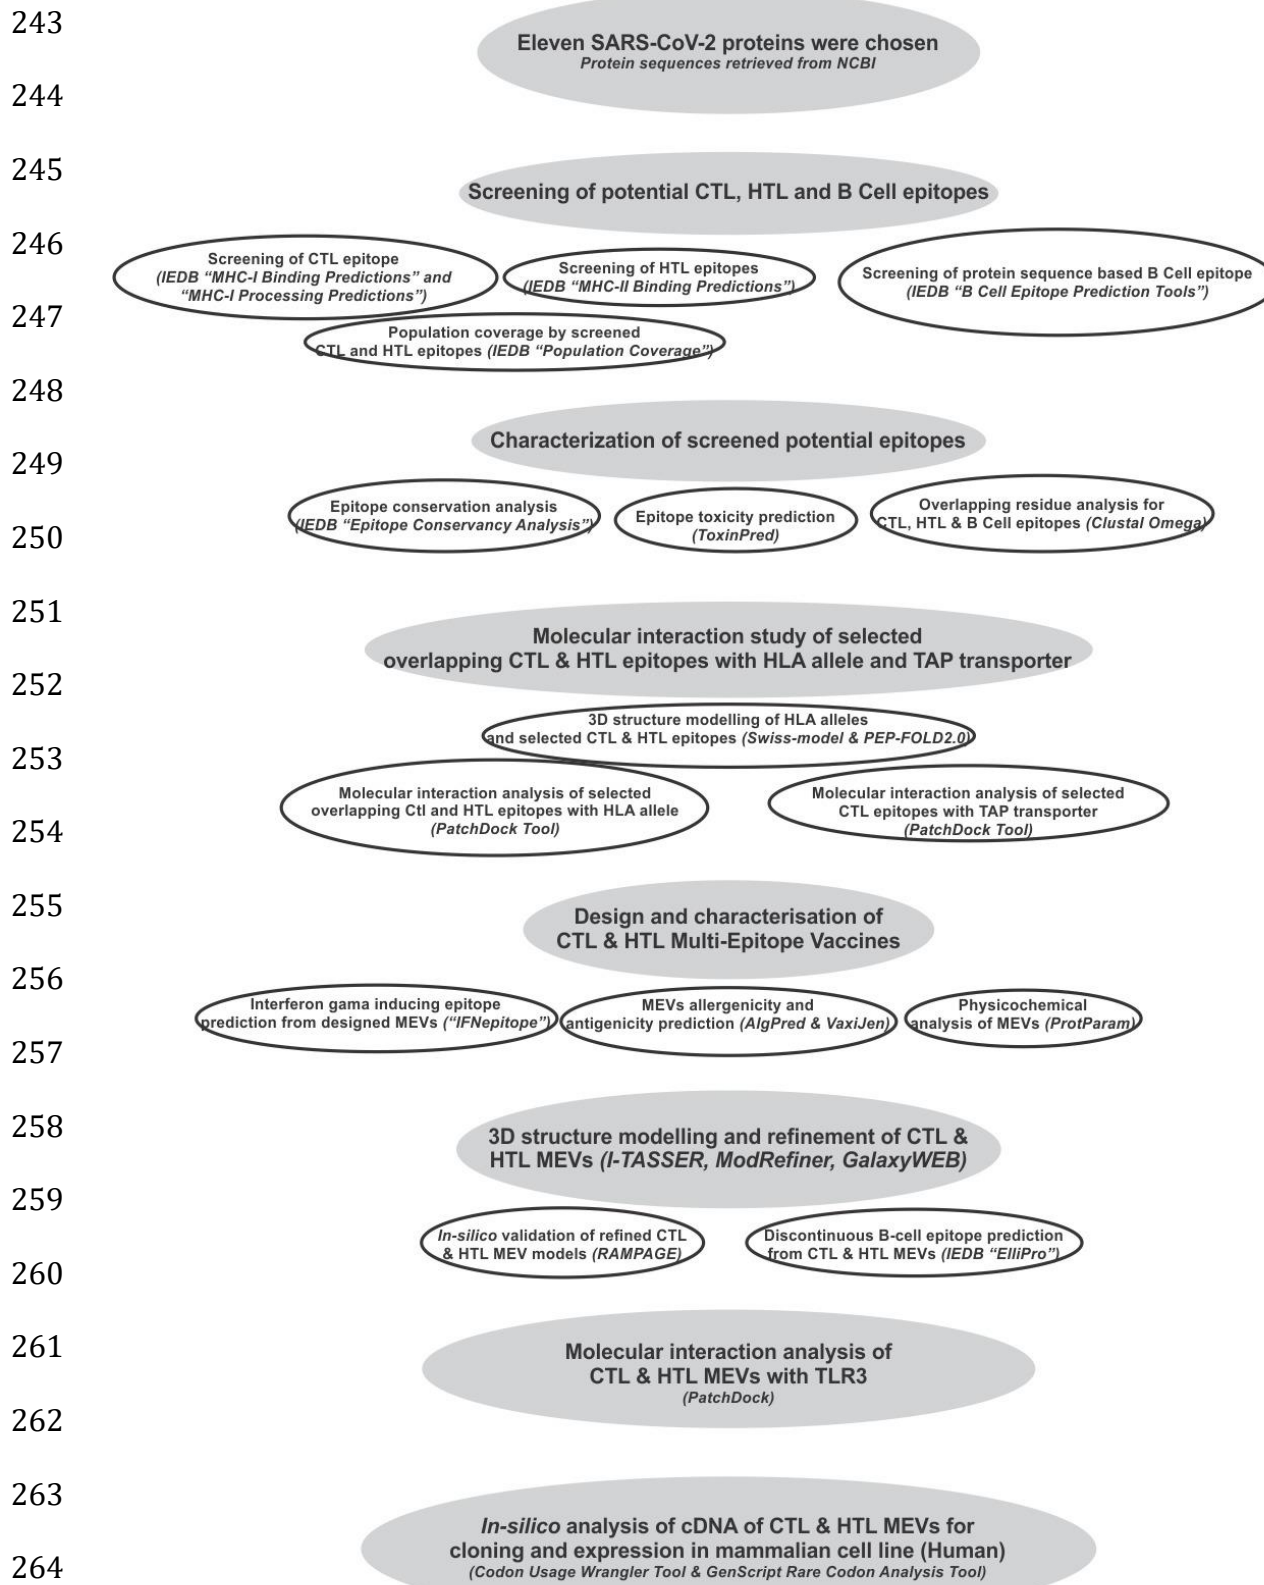

## 265 **Screening of Potential Epitopes**

### 266 ***T cell Epitope Prediction***

267 *Screening of Cytotoxic T lymphocyte (CTL) Epitope.* The screening of Cytotoxic  
268 T lymphocyte epitopes was performed by the IEDB (Immune Epitope Database)  
269 tools “MHC-I Binding Predictions” (<http://tools.iedb.org/mhci/>) and “MHC-I  
270 Processing Predictions” (<http://tools.iedb.org/processing/>) (Tenzer et al., 2005;  
271 Peters et al., 2003; Hoof et al., 2009). Both the tools use six different methods  
272 (viz. Consensus, NN-align, SMM-align, Combinatorial library, Sturniolo and  
273 NetMHCIIpan) and generate “Percentile rank” and a “total score” respectively.

274 The screening is based on the total amount of cleavage sites in the  
275 protein. TAP score estimates an effective log<sub>10</sub>-(IC<sub>50</sub>) values (half maximal  
276 inhibitory concentration (IC<sub>50</sub>) for binding to TAP of a peptide or its N-terminal  
277 prolonged precursors. The MHC binding prediction score is -log<sub>10</sub>(IC<sub>50</sub>) values for  
278 binding to MHC of a peptide (Calis et al., 2013). The IC<sub>50</sub> (nM) value for each  
279 epitope and MHC allele binding pairs were also obtained by this IEDB tool.  
280 Epitopes having high, intermediate, and least affinity of binding to their HLA allele  
281 binders have IC<sub>50</sub> values < 50 nM, < 500 nM and < 5000 nM, respectively.

282 Immunogenicity of all the screened CTL epitopes was also obtained by  
283 using “MHC I Immunogenicity” tool of IEDB  
284 (<http://tools.iedb.org/immunogenicity/>) with all the parameters set to default  
285 analyzing 1st, 2nd, and C-terminus amino acids of the given screened epitope  
286 (Calis et al., 2013). The tool predicts the immunogenicity of a given peptide-MHC  
287 (pMHC) complex based on the physiochemical properties of constituting amino

288 acid and their position within the peptide sequence.

289

290 *Screening of Helper T lymphocyte (HTL) Epitopes.* To screen out the Helper T  
291 lymphocyte epitopes from SARS-CoV-2 proteins, the IEDB tool “MHC-II Binding  
292 Predictions” (<http://tools.iedb.org/mhcii/>) was used. The tool generates  
293 “Percentile rank” for each potential peptide. The lower the value of percentile,  
294 higher would be the affinity. This percentile rank is generated by the combination  
295 of three different methods viz. combinatorial library, SMM\_align & Sturniolo; and  
296 by comparing the score of the peptide against the scores of other random five  
297 million 15-mer peptides of SWISSPROT database (Wang et al., 2010; Sidney et  
298 al., 2008; Nielsen et al., 2007; Sturniolo et al., 1999). The rank from the  
299 consensus of all three methods was generated by the median percentile rank of  
300 the three methods.

301

302 *Population Coverage by CTL and HTL epitopes.* The “Population Coverage” tool  
303 of IEDB (<http://tools.iedb.org/population/>) was used to elucidate the world human  
304 population coverage by the shortlisted 38 CTL and 33 HTL epitopes derived from  
305 nine SARS-CoV-2 proteins (Bui et al., 2006). T cells recognize the complex  
306 between a specific major MHC molecule and a particular pathogen-derived  
307 epitope. The given epitope will elicit a response only in an individual that express  
308 an MHC molecule, which is capable of binding that particular epitope. This  
309 denominated MHC restriction of T cell responses and the MHC polymorphism  
310 provides the basis for population coverage study. The MHC types are expressed

311 at dramatically different frequencies in different ethnicities. Hence a vaccine with  
312 larger population coverage could be of greater importance (Sturniolo et al.,  
313 1999). Clinical administration of multiple-epitopes involving both the CTL and the  
314 HTL epitopes are predicted here to have a greater probability of larger human  
315 population coverage worldwide.

316

### 317 ***B Cell Epitope Prediction***

318 *Sequence-based B Cell epitope prediction.* Protein sequence-based method  
319 “Bepipred Linear Epitope Prediction” was utilized to screen linear B cell epitopes  
320 from eleven different SARS-CoV-2 proteins. The tool “B Cell Epitope Prediction  
321 Tools” of IEDB server (<http://tools.iedb.org/bcell/>) was utilized. In this screening,  
322 the parameters such as hydrophilicity, flexibility, accessibility, turns, exposed  
323 surface, polarity and the antigenic propensity of the polypeptides is correlated  
324 with its location in the protein. This allows the search for continuous epitopes  
325 prediction from protein sequence. The prediction is base on the propensity scales  
326 for each of the 20 amino acids. For a window size  $n$ , the  $i - (n-1)/2$  neighboring  
327 residues on each side of residue  $i$  are used to compute the score for the residue  
328  $i$ . The method “Bepipred Linear Epitope Prediction” utilized here is based on the  
329 propensity scale method as well as the physiochemical properties of the given  
330 antigenic sequence to screen potential epitopes (Larsen et al., 2006).

331

### 332 **Characterization of potential epitopes**

333 *Epitope conservation analysis.* The shortlisted CTL, HTL and B cell epitopes

334 screened from eleven SARS-CoV-2 proteins were analyzed for the conservancy  
335 of their amino acid sequence by “Epitope Conservancy Analysis” tool  
336 (<http://tools.iedb.org/conservancy/>) of IEDB. The epitope conservancy is the  
337 number of protein sequences (retrieved from NCBI) that contain that particular  
338 epitope. The analysis was done against their entire respective source protein  
339 sequences of SARS-CoV-2 proteins retrieved from the NCBI protein database  
340 (Bui et al., 2007).

341

342 *Epitope Toxicity prediction.* The tool ToxinPred  
343 ([http://crdd.osdd.net/raghava/toxinpred/multi\\_submit.php](http://crdd.osdd.net/raghava/toxinpred/multi_submit.php)) was used to analyze  
344 the toxicity of shortlisted CTL, HTL and B cell epitopes. The tool allows to identify  
345 highly toxic or non-toxic short peptides. The toxicity check analysis was done by  
346 the “SVM (Swiss-Prot) based” (support vector machine) method utilizing dataset  
347 of 1805 sequences as positive, 3593 negative sequences from Swissprot as well  
348 as an alternative dataset comprises the same 1805 positive sequences and  
349 12541 negative sequences from TrEMBLE (Gupta et al., 2013).

350

351 *Overlapping residue analysis.* The overlapping residue analysis for the shortlisted  
352 38 CTL, 33 HTL and the 12 B cell linear epitopes was performed by the Multiple  
353 Sequence Alignment (MSA) analysis by Clustal Omega tool  
354 (<https://www.ebi.ac.uk/Tools/msa/clustalo/>) of EBI (European Bioinformatics  
355 Institute) (Sievers et al., 2011). The Clustal Omega multiple sequence alignment  
356 tool virtually aligns any number of protein sequences and delivers an accurate

357 alignment.

358

359 *Epitope selected for molecular interaction study with HLA allele and TAP*  
360 *transporter.* Based on the overlapping residue analysis of shortlisted CTL, HTL  
361 and linear B cell epitopes few numbers of CTL and HTL epitopes were chosen  
362 for further analysis. The chosen epitopes are encircled shown in Fig.2. These  
363 epitopes were chosen based on partial or full overlapping sequence region  
364 amongst all three types of epitopes (CTL, HTL and B Cell). The chosen epitopes  
365 were further analyzed for their interactions with their respective HLA allele  
366 binders and TAP cavity interaction.

367

368 **Molecular interaction analysis of selected epitopes with HLA allele and TAP**  
369 **transporter.**

370 *Tertiary structure modeling of HLA alleles and selected T cell epitopes.* The  
371 Swiss-model was used for homology modeling of the HLA class I and II allele  
372 binders of the chosen epitopes (Arnold et al., 2006). The amino acid sequences  
373 of the HLA allele binders were retrieved from Immuno Polymorphism Database  
374 (IPD-IMGT/HLA) (<https://www.ebi.ac.uk/ipd/imgt/hla/allele.html>). Templates for  
375 homology modeling were chosen based on the highest amino acid sequence  
376 similarity. All the generated HLA allele models had acceptable QMEAN value  
377 (cutoff -4.0) (Supplementary table S1). The QMEAN value gives a composite  
378 quality estimate involving both global as well as local analysis of the model  
379 (Benkert et al., 2008).



380 The PEP-FOLD 2.0 a de novo structure prediction tool at RPBS Web  
381 Portal ([https://mobylerpbs.univ-paris-diderot.fr/cgi-bin/portal.py#forms::PEP-](https://mobylerpbs.univ-paris-diderot.fr/cgi-bin/portal.py#forms::PEP-FOLD)  
382 FOLD) was utilized to generate tertiary structures for the chosen CTL and HTL  
383 epitopes (Shen et al., 2014).

384

385 *Molecular interaction analysis of chosen CTL and HTL epitopes with HLA alleles.*

386 The PatchDock tool (<http://bioinfo3d.cs.tau.ac.il/PatchDock/>) was utilized for *in-*  
387 *silico* molecular docking study of the selected CTL and HTL epitopes with their  
388 respective HLA class I and II allele binders (Bell et al., 2005; Duhovny et al.,  
389 2002; Schneidman-Duhovny et al., 2005). PatchDock utilizes an algorithm for  
390 unbound (real- life) docking of molecules for protein-protein complex formation.  
391 The algorithm carries out the rigid docking, with the surface variability/flexibility  
392 implicitly addressed through liberal intermolecular penetration. The algorithm  
393 focuses on the (i) initial molecular surface fitting on localized, curvature-based  
394 surface patches (ii) use of Geometric Hashing and Pose Clustering for initial  
395 transformation detection (iii) computation of shape complementarity utilizing the  
396 Distance Transform (iv) efficient steric clash detection and geometric fit scoring  
397 based on a multi-resolution shape representation and (v) utilization of biological  
398 information by focusing on hot-spot rich surface patches (Bell et al., 2005;  
399 Duhovny et al., 2002; Schneidman-Duhovny et al., 2005).

400

401 *Molecular interaction analysis of selected CTL epitopes with TAP transporter.*

402 TAP transporter plays an important role in the presentation of CTL epitope. From

403 the cytosol after proteasome processing, the fragmented peptide of foreign  
404 protein gets transported to endoplasmic reticulum (ER) through the TAP  
405 transporter. From the ER these short peptides reach to Golgi bodies and then get  
406 presented on the cell surface (Abele et al., 2004). Molecular interaction study of  
407 the chosen CTL epitopes within the TAP transporter cavity was performed by  
408 molecular docking study utilizing the PatchDock tool. For accurate prediction, the  
409 cryo-EM structure of TAP transporter (PDB ID: 5u1d) was used by removing the  
410 antigen from TAP cavity of the original structure (Oldham et al., 2016).

411

412 **Design, characterization and molecular interaction analysis of Multi-**  
413 **Epitope Vaccines with immune receptor.**

414 *Design of Multi-Epitope Vaccines.* The screened and shortlisted high scoring 38  
415 CTL and 33 HTL epitopes were utilized to design CTL and HTL Multi-Epitope  
416 vaccines (Table 1 and 2). Short peptide EAAAK and GGGGS were used as rigid  
417 and flexible linkers respectively (Fig.2). The GGGGS linker provides proper  
418 conformational flexibility to the vaccine tertiary structure and hence facilitates  
419 stable conformation to the vaccine. The EAAAK linker facilitates in domain  
420 formation and hence facilitates the vaccine to obtain its final stable structure.  
421 Truncated (residues 10-153) *Onchocerca volvulus* activation-associated secreted  
422 protein-1 (Ov-ASP-1) has been utilized as an adjuvant at N terminal of both the  
423 CTL and HTL MEVs (MacDonald et al., 2005; Guo et al., 2015; He et al., 2009;  
424 Hu et al., 2004; Hajighahramani et al., 2017; Chen et al., 2013; Srivastava et al.,  
425 2019; Srivastava et al., 2018).

426  
427  
428  
429  
430  
431  
432  
433  
434  
435  
436  
437  
438  
439  
440  
441  
442  
443  
444  
445  
446  
447  
448

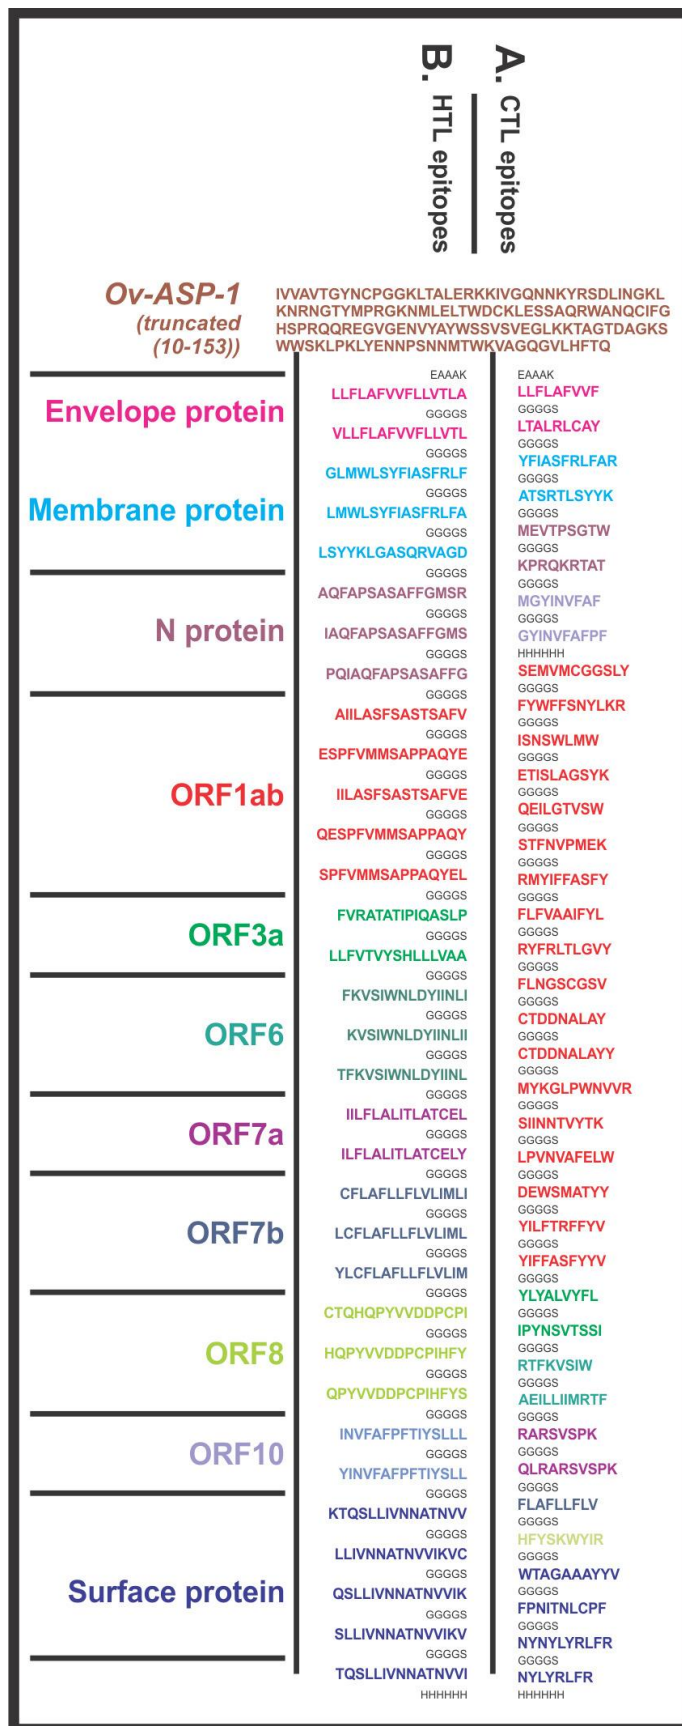

449 **Figure 2. Design of SARS-CoV-2 Multi-Epitope Vaccine (MEVs).** (A) CTL and  
450 (B) HTL epitopes were linked by the short peptide linker 'GGGGS'. Truncated  
451 (residues 10-153) *Onchocerca volvulus* activation-associated secreted protein-1  
452 (Ov-ASP-1) has been utilized at the N terminal of both the MEVs. The short  
453 peptide EAAAK was used to link Ov-ASP-1 at N terminal. Epitopes from different  
454 proteins were colored in different colors. C terminal 6xHis is designed as His tag.

455

#### 456 ***Characterization of designed Multi-Epitope Vaccines***

457 *Physicochemical property analysis of designed MEVs.* The ProtParam  
458 (<https://web.expasy.org/protparam/>) tool was utilized to analyze the  
459 physicochemical properties of the amino acid sequence of the designed CTL and  
460 HTL MEVs (Gasteiger et al., 2005). The ProtParam analysis performs an  
461 empirical investigation for the given query amino acid sequence. ProtParam  
462 computes various physicochemical properties derived from a given protein  
463 sequence.

464

465 *Interferon-gamma inducing epitope prediction.* From the designed amino acid  
466 sequence of both the MEVs potential interferon-gamma (IFN- $\gamma$ ) epitopes were  
467 screened by "IFN epitope" server  
468 (<http://crdd.osdd.net/raghava/ifnepitope/scan.php>) using "Motif and SVM hybrid",  
469 (MERC: Motif-Emerging and with Classes-Identification, and SVM: support  
470 vector machine) method. The tool predicts peptides from protein sequences  
471 having the capacity to induce IFN-gamma release from CD4+ T cells. This

472 module generates overlapping peptides from the query sequence and predicts  
473 IFN-gamma inducing peptides. For the screening, IEDB database with 3705 IFN-  
474 gamma inducing and 6728 non-inducing MHC class II binders are utilized  
475 (Nagpal et al., 2015; Dhanda et al., 2013).

476

477 *MEVs allergenicity and antigenicity prediction.* Both the designed MEVs were  
478 further analyzed for allergenicity and antigenicity prediction by utilizing the  
479 AlgPred (<http://crdd.osdd.net/raghava/algpred/submission.html>) and the Vaxigen  
480 (<http://www.ddg-pharmfac.net/vaxijen/VaxiJen/VaxiJen.html>) tools respectively  
481 (Saha et al., 2006; Doytchinova and Flower 2007). The AlgPred prediction is  
482 based on the similarity of already known epitope with any region of the submitted  
483 protein. For the screening of allergenicity, the Swiss-prot dataset consisting of  
484 101725 non-allergens and 323 allergens is utilized. The VaxiJen utilizes an  
485 alignment-free approach, solely based on the physicochemical properties of the  
486 query amino acid sequence. For the prediction of antigenicity, the Bacterial, viral  
487 and the tumor protein datasets are used by VaxiJen to derive models for the  
488 prediction of whole protein antigenicity. Every set consisted of known 100  
489 antigens and 100 non-antigens.

490

491 *Tertiary structure modeling and refinement of MEVs.* The tertiary structure of  
492 both the designed CTL and HTL MEVs were generated by homology modeling  
493 utilizing the I-TASSER modeling tool ([https://zhanglab.ccmb.med.umich.edu/I-](https://zhanglab.ccmb.med.umich.edu/I-TASSER/)  
494 TASSER/). The I-TASSER is a tool for protein structure prediction based on the

495 sequence-to-structure-to-function paradigm (Roy et al., 2010). The tool  
496 generates three-dimensional (3D) atomic models from multiple threading  
497 alignments and iterative structural assembly simulations for a submitted amino  
498 acid sequence. I-TASSER works based on the structure templates identified by  
499 LOMETS, a meta-server, from the PDB library. I-TASSER only uses the  
500 templates of the highest Z-score which is the difference between the raw and  
501 average scores in the unit of standard deviation. For each target model, the I-  
502 TASSER simulations generate a large ensemble of structural conformations,  
503 called decoys. To select the final models, I-TASSER uses the SPICKER program  
504 to cluster all the decoys based on the pair-wise structure similarity and reports up  
505 to five models. The Normalized Z-score  $>1$  mean a good alignment and vice  
506 versa. The Cov represents the coverage of the threading alignment and is equal  
507 to the number of aligned residues divided by the length of query protein. Ranking  
508 of templet proteins is based on TM-score of the structural alignment between the  
509 query structure model and known structures. The RMSD is the RMSD between  
510 templet residues and query residues that are structurally aligned by TM-align.

511 The refinement of both the generated MEV models was performed by  
512 ModRefiner (<https://zhanglab.ccmb.med.umich.edu/ModRefiner/>) and  
513 GalaxyRefine tool (<http://galaxy.seoklab.org/cgi-bin/submit.cgi?type=REFINE>)  
514 (Dong et al., 2011). TM-score generated by ModRefiner indicates the structural  
515 similarity of the refined model with the original input model. Closer the TM-Score  
516 to 1, higher would be the similarity of original and the refined model. RMSD value  
517 of the refined model shows the conformational deviation from the initial input

518 models.

519 The GalaxyRefine tool refines the query tertiary structure by repeated  
520 structure perturbation as well as by utilizing the subsequent structural relaxation  
521 by the molecular dynamics simulation. The tool GalaxyRefine generates reliable  
522 core structures from multiple templates and then re-builds unreliable loops or  
523 termini by using an optimization-based refinement method (Ko et al., 2012; Wang  
524 et al., 2013; Shin et al., 2014). To avoid any breaks in the 3D model  
525 GalaxyRefine uses the triaxial loop closure method. The MolProbity score  
526 generated for a given refined model indicates the log-weighted combination of  
527 the clash score, the percentage of Ramachandran not favored residues and the  
528 percentage of bad side-chain rotamers.

529

530 *Validation of CTL and HTL MEVs refined models.* Both the refined CTL and HTL  
531 MEV 3D models were further validated by RAMPAGE analysis tool  
532 (<http://mordred.bioc.cam.ac.uk/~rapper/rampage.php>) (S.C. Lovell et al., 2008;  
533 Ramakrishnan, C. et al., 1965). The generated Ramachandran plots for the MEV  
534 models show the sterically allowed and disallowed residues along with their  
535 dihedral psi ( $\psi$ ) and phi ( $\phi$ ) angles.

536

537 *Linear and Discontinuous B-cell epitope prediction from MEVs.* The ElliPro  
538 (ElliPro: Antibody Epitope Prediction tool; <http://tools.iedb.org/ellipro/>) method  
539 available at IEDB, was used to screen the linear and the discontinuous B cell  
540 epitopes from the MEVs vaccine models. The ElliPro method analyses based on

541 the location of residue in the protein's 3D structure. The residues lying outside of  
542 an ellipsoid covering 90% of the inner core protein residues score highest  
543 Protrusion Index (PI) of 0.9; and so on. The discontinuous epitopes predicted by  
544 the ElliPro tool are clustered based on the distance "R" in Å between two  
545 residue's centers of mass lying outside of the largest possible ellipsoid. The  
546 larger value of R indicates larger distant residues (residue discontinuity) are  
547 screened in the epitopes (Kringelum et al., 2012; Ponomarenko et al., 2008).

548

549 ***Molecular interaction analysis of MEVs with immunological receptor.***

550 *Molecular docking study of MEVs and TLR-3.* Molecular interaction analysis of  
551 both the designed MEVs with Toll-Like receptor-3 (TLR-3), was performed by  
552 molecular docking and molecular dynamics simulation. Molecular docking was  
553 performed by PatchDock server (<http://bioinfo3d.cs.tau.ac.il/PatchDock/>)  
554 (Schneidman-Duhovny et al., 2005). PatchDock utilizes an algorithm for unbound  
555 (mimicking real- world environment) docking of molecules for protein-protein  
556 complex formation as explained earlier (Bell et al., 2005; Duhovny et al., 2002).  
557 For molecular docking, the 3D structure of human TLR-3 ectodomain (ECD) was  
558 retrieved from PDB databank (PDB ID: 2A0Z). The study provides dynamical  
559 properties of the designed system with MEVs-TLR3 complexes with a guess at  
560 the interactions between the molecules, and also it gives 'exact' predictions of  
561 bulk properties including the hydrogen bond formation and conformation of the  
562 molecules forming the complex.

563 *Molecular Dynamics (MD) Simulations study of MEVs and TLR-3 complex.* The



564 MEVs-TLR3 molecular interactions were further evaluated using molecular  
565 dynamics simulations analysis. MD simulation studies were performed for 10 ns  
566 by using YASARA (Yet Another Scientific Artificial Reality Application) (Krieger, E.  
567 and Vriend, G., et al., 2015). The simulations were carried out in an explicit water  
568 environment in a dodecahedron simulation box at a constant temperature (298K)  
569 and pressure (1 atm) and pH 7.4 with periodic cell boundary condition. The  
570 solvated systems were neutralized with counter ions (NaCl) (conc. 0.9 M). The  
571 AMBER14 force field have been applied on to the systems during simulation  
572 (Maier, J.A., et al., 2015; Case, D.A., et al., 2014). Long-range electrostatic  
573 energy and forces were calculated using particle-mesh-based Ewald method  
574 (Toukmaji, A., et al., 2000). The solvated structures was minimized by the  
575 steepest descent method at a temperature of 298K and a constant pressure.  
576 Then the complexes were equilibrated for a 1ns period. After equilibration, a  
577 production MD was run for 10 ns at a constant temperature and pressure and  
578 time frames were saved at every 10 ps for each simulation. The RMSD and  
579 RMSF values for C $\alpha$ , Back bone and all the atoms of both the MEV complexes  
580 were analyzed for each simulation conducted.

581

### 582 ***In-silico* analysis of MEVs for cloning and expression potency**

583 *Analysis of cDNA of both the MEVs for cloning and expression in the mammalian*  
584 *host cell line.* Complementary DNA of both the MEVs, codon-optimized for  
585 expression in Mammalian cell line (Human) was generated by Java Codon  
586 Adaptation Tool (<http://www.jcat.de/>). The generated cDNA of both the MEVs

587 was further analyzed by GenScript Rare Codon Analysis Tool  
588 (<https://www.genscript.com/tools/rare-codon-analysis>). The tool analyses the GC  
589 content, Codon Adaptation Index (CAI) and the Tandem rare codon frequency for  
590 a given cDNA (Morla et al., 2016; Wu et al., 2010). The CAI indicates the  
591 possibility of cDNA expression in a chosen expression system. The tandem rare  
592 codon frequency indicates the presence of low-frequency codons in the given  
593 cDNA.

594

595

## 596 **RESULTS & DISCUSSION**

### 597 **Screening of potential epitopes**

#### 598 ***T cell Epitope Prediction***

599 *Screening of Cytotoxic T lymphocyte (CTL) Epitope.* Cytotoxic T lymphocyte  
600 (CTL) epitopes were screened by “MHC-I Binding Predictions” and “MHC-I  
601 Binding Predictions” IEDB tools. These epitopes are shortlisted based on the  
602 total amount of cleavage site in the protein, low IC(50) (nM) value for epitope-  
603 HLA class I allele pairs, and for binding to TAP cavity.

604 The 38 epitopes predicted by “MHC-I Binding Predictions” tool with the  
605 highest “Percentile Rank” were shortlisted for multi-epitope vaccine design and  
606 are listed in table 1. Rest 101 epitopes-HLA I allele pairs are listed in  
607 Supplementary table S8. The 67 epitopes-HLA I allele pairs predicted by “MHC-I  
608 Processing Predictions” tool with the highest “Total score” are listed in  
609 Supplementary table 9.

610 The immunogenicity of the shortlisted CTL epitopes was also determined  
 611 and are mentioned in table 1, Supplementary table S8, and S9. The higher  
 612 immunogenicity score indicates the greater immunogenic potential of the given  
 613 epitope.

614

615 **Table 1. Shortlisted high percentile ranking SARS-CoV-2 CTL epitopes.** Selected  
 616 high percentile CTL epitopes and their respective HLA alleles binders are listed. *In-silico*  
 617 analysis has shown all the selected epitopes to be non-toxic (Non-Toxin) as well as they  
 618 show significant conservancy and high immunogenicity. Six epitopes shown with \*\*  
 619 show exact match with the epitopes published by Grifoni et al., 2020, indicate consensus  
 620 in results.

621

622

623

| SARS-CoV-2 Proteins | S.No | Peptide       | Conservancy      | Immunogenicity | Toxicity  | Allele  | Length | Method used                            | Percentile Rank |
|---------------------|------|---------------|------------------|----------------|-----------|---------|--------|----------------------------------------|-----------------|
| E Protein           | 1    | LLFLAFVVF     | 99.59% (480/482) | 0.2341         | Non-Toxin | B*15:01 | 9      | Consensus (ann/comblib_sidney2008/smm) | 0.1             |
| E Protein           | 2    | LTALRLCAY     | 99.17% (478/482) | 0.01886        | Non-Toxin | A*01:01 | 9      | Consensus (ann/smm)                    | 0.12            |
| M Protein           | 3    | YFIASFRLFAR   | 99.37% (474/477) | 0.19709        | Non-Toxin | A*33:01 | 11     | ann                                    | 0.03            |
| M Protein           | 4    | ATSRTLSTYYK** | 98.95% (472/477) | -0.13563       | Non-Toxin | A*11:01 | 10     | Consensus (ann/smm)                    | 0.06            |
| N protein           | 5    | MEVTPSGTW     | 97.39% (485/498) | -0.06279       | Non-Toxin | B*44:02 | 9      | Consensus (ann/smm)                    | 0.06            |
| N protein           | 6    | KPRQKRTAT     | 97.79% (487/498) | -0.20542       | Non-Toxin | B*07:02 | 9      | Consensus (ann/comblib_sidney2008/smm) | 0.1             |
| orf10               | 7    | MGYINVFVAF    | 99.38% (477/480) | -0.09452       | Non-Toxin | B*35:01 | 9      | Consensus (ann/comblib_sidney2008/smm) | 0.1             |
| orf10               | 8    | GYINVFVAFPF** | 98.31% (232/236) | 0.20158        | Non-Toxin | A*23:01 | 10     | Consensus (ann/smm)                    | 0.11            |
| orf-1ab             | 9    | SEMVMCGGSLY   | 99.12% (452/456) | 0.32633        | Non-Toxin | B*44:02 | 11     | ann                                    | 0.03            |
| orf-1ab             | 10   | FYWFFSNYLKR   | 99.78% (455/456) | 0.37766        | Non-Toxin | A*33:01 | 11     | ann                                    | 0.04            |
| orf-1ab             | 11   | ISNSWLMW      | 99.56% (454/456) | -0.24791       | Non-Toxin | B*58:01 | 8      | ann                                    | 0.05            |
| orf-1ab             | 12   | ETISLAGSYK    | 99.78% (455/456) | 0.08174        | Non-Toxin | A*68:01 | 10     | Consensus (ann/smm)                    | 0.06            |
| orf-1ab             | 13   | QEILGTVSW     | 99.78% (455/456) | 0.27341        | Non-Toxin | B*44:02 | 9      | Consensus (ann/smm)                    | 0.06            |
| orf-1ab             | 14   | STFNVPMEK     | 100% (456/456)   | -0.32016       | Non-Toxin | A*11:01 | 9      | Consensus (ann/smm)                    | 0.06            |
| orf-1ab             | 15   | RMVYFFASFY    | 100% (456/456)   | 0.21107        | Non-Toxin | A*30:02 | 10     | Consensus (ann/smm)                    | 0.06            |
| orf-1ab             | 16   | FLFVAAIFYL    | 99.56% (454/456) | -0.19814       | Non-Toxin | A*02:01 | 10     | Consensus (ann/smm)                    | 0.06            |
| orf-1ab             | 17   | RYFRLTLGVY    | 100% (456/456)   | 0.03976        | Non-Toxin | A*30:02 | 10     | Consensus (ann/smm)                    | 0.06            |
| orf-1ab             | 18   | FLNGSCGSV     | 100% (456/456)   | -0.20585       | Non-Toxin | A*02:03 | 9      | Consensus (ann/smm)                    | 0.06            |
| orf-1ab             | 19   | CTDDNALAY     | 99.37% (476/479) | 0.32004        | Non-Toxin | A*01:01 | 9      | Consensus (ann/smm)                    | 0.06            |
| orf-1ab             | 20   | CTDDNALAYY**  | 99.37% (476/479) | 0.28694        | Non-Toxin | A*01:01 | 10     | Consensus (ann/smm)                    | 0.06            |
| orf-1ab             | 21   | MYKGLPWNVVR   | 100% (456/456)   | -0.11151       | Non-Toxin | A*33:01 | 11     | ann                                    | 0.06            |
| orf-1ab             | 22   | SIINNTVYTK**  | 100% (456/456)   | 0.15936        | Non-Toxin | A*11:01 | 10     | Consensus (ann/smm)                    | 0.06            |
| orf-1ab             | 23   | LPVNVAFELW    | 98.68% (450/456) | -0.00254       | Non-Toxin | B*53:01 | 10     | Consensus (ann/smm)                    | 0.06            |
| orf-1ab             | 24   | DEWSMATYY**   | 99.78% (455/456) | 0.07355        | Non-Toxin | B*44:03 | 9      | Consensus (ann/smm)                    | 0.07            |
| orf-1ab             | 25   | YILFTRFFVY    | 99.56% (454/456) | -0.02845       | Non-Toxin | A*02:06 | 10     | Consensus (ann/smm)                    | 0.07            |
| orf-1ab             | 26   | YIFFASFYYV    | 100% (456/456)   | 0.12661        | Non-Toxin | A*02:06 | 10     | Consensus (ann/smm)                    | 0.07            |
| ORF3a               | 27   | YLYALVYFL**   | 100% (456/456)   | 0.40924        | Non-Toxin | A*02:01 | 9      | Consensus (ann/comblib_sidney2008/smm) | 0.1             |
| ORF3a               | 28   | IPYNSVTSSI    | 99.56% (454/456) | 0.13772        | Non-Toxin | B*51:01 | 10     | Consensus (ann/smm)                    | 0.11            |
| Orf6                | 29   | RTFKVSIW      | 96.88% 466/481   | 0.13151        | Non-Toxin | B*57:01 | 8      | ann                                    | 0.05            |
| Orf6                | 30   | AEILLIIMRTF   | 97.92% 471/481   | -0.32835       | Non-Toxin | B*44:02 | 11     | ann                                    | 0.06            |
| ORF7a               | 31   | RARSVSPK      | 99.79% (480/481) | -0.18221       | Non-Toxin | A*30:01 | 8      | ann                                    | 0.11            |
| ORF7a               | 32   | QLRARSVSPK    | 99.58% (479/481) | 0.1815         | Non-Toxin | A*03:01 | 10     | Consensus (ann/smm)                    | 0.16            |
| orf7b               | 33   | FLAFLFLV      | 98.33% (472/480) | -0.16177       | Non-Toxin | A*02:03 | 9      | Consensus (ann/smm)                    | 0.07            |

|           |    |            |                   |          |           |         |    |                     |      |
|-----------|----|------------|-------------------|----------|-----------|---------|----|---------------------|------|
| orf8      | 34 | HFYSKWYIR  | 98.33% (472/480)  | -0.27456 | Non-Toxin | A*31:01 | 9  | Consensus (ann/smm) | 0.11 |
| S Protein | 35 | WTAGAAAYYV | 99.58% (470/472)  | 0.15455  | Non-Toxin | A*68:02 | 10 | Consensus (ann/smm) | 0.06 |
| S Protein | 36 | FPNITNLCPF | 100.00% (472/472) | 0.1009   | Non-Toxin | B*53:01 | 10 | Consensus (ann/smm) | 0.06 |
| S Protein | 37 | NYNYLYRLFR | 98.52% (465/472)  | 0.08754  | Non-Toxin | A*33:01 | 10 | Consensus (ann/smm) | 0.07 |
| S Protein | 38 | NYLYRLFR   | 98.52% (465/472)  | 0.13144  | Non-Toxin | A*33:01 | 8  | ann                 | 0.07 |

624

625

626 *Screening of Helper T lymphocyte (HTL) epitopes.* The screening of helper T

627 lymphocyte (HTL) epitopes from eleven different proteins of SARS-CoV-2 was

628 performed based on “Percentile rank”. The smaller the value of percentile rank

629 the higher would be the affinity of the peptide with its respective HLA allele

630 binders. The 33 epitopes with high percentile ranking were shortlisted (Table 2).

631 Another 180 potential HTL cell epitopes-HLA allele II pairs with high Percentile

632 rank, screened in our study are listed in Supplementary table S10.

633

634 **Table 2. Shortlisted high scoring SARS-CoV-2 HTL epitopes.** Selected high scoring

635 HTL epitopes and their respective HLA alleles binders are listed. *In-silico* analysis has

636 shown all the selected epitopes to be non-toxic (Non-Toxin) as well as they show

637 significant conservancy. Four epitopes shown with \*\* show exact match with the

638 epitopes published by Grifoni et al., 2020, indicate consensus in results.

639

640

| SARS-CoV-2 Proteins | S.No. | Peptide            | Conservancy      | Non-Toxin | Allele                | Method used                  | Percentile Rank |
|---------------------|-------|--------------------|------------------|-----------|-----------------------|------------------------------|-----------------|
| E Protein           | 1     | LLFLAFVVFLLVTLA    | 99.59% (480/482) | Non-Toxin | DPA1*03:01/DPB1*04:02 | Consensus (comb.lib./smm/nn) | 0.02            |
| E Protein           | 2     | VLLFLAFVVFLLVTL    | 99.59% (480/482) | Non-Toxin | DPA1*03:01/DPB1*04:02 | Consensus (comb.lib./smm/nn) | 0.02            |
| M Protein           | 3     | GLMWLSYFIASFRLF    | 97.48% (465/477) | Non-Toxin | DPA1*01:03/DPB1*02:01 | Consensus (comb.lib./smm/nn) | 0.05            |
| M Protein           | 4     | LMWLSYFIASFRLFA    | 97.69% (466/477) | Non-Toxin | DPA1*01:03/DPB1*02:01 | Consensus (comb.lib./smm/nn) | 0.05            |
| M Protein           | 5     | LSYYKLGASQRVAGD**  | 98.95% (472/477) | Non-Toxin | DRB1*09:01            | Consensus (comb.lib./smm/nn) | 0.06            |
| N Protein           | 6     | AQFAPSASAFFGMSR    | 97.59% (486/498) | Non-Toxin | DRB1*09:01            | Consensus (comb.lib./smm/nn) | 0.01            |
| N Protein           | 7     | IAQFAPSASAFFGMS    | 97.39% (485/498) | Non-Toxin | DRB1*09:01            | Consensus (comb.lib./smm/nn) | 0.01            |
| N Protein           | 8     | PQIAQFAPSASAFFG    | 97.39% (485/498) | Non-Toxin | DRB1*09:01            | Consensus (comb.lib./smm/nn) | 0.01            |
| ORF1ab              | 9     | AIIASFASASTSAFV    | 100% (456/456)   | Non-Toxin | DRB1*09:01            | Consensus (comb.lib./smm/nn) | 0.01            |
| ORF1ab              | 10    | ESPFVMMMSAPPAQYE** | 100% (456/456)   | Non-Toxin | DRB1*01:01            | Consensus (comb.lib./smm/nn) | 0.01            |
| ORF1ab              | 11    | IILASFASASTSAFVE   | 100% (456/456)   | Non-Toxin | DRB1*09:01            | Consensus (comb.lib./smm/nn) | 0.01            |
| ORF1ab              | 12    | QESPFVMMMSAPPAQY   | 100% (456/456)   | Non-Toxin | DRB1*01:01            | Consensus (comb.lib./smm/nn) | 0.01            |
| ORF1ab              | 13    | SPFVMMMSAPPAQYEL   | 100% (456/456)   | Non-Toxin | DRB1*01:01            | Consensus (comb.lib./smm/nn) | 0.01            |

|           |    |                      |                     |           |                           |                                  |      |
|-----------|----|----------------------|---------------------|-----------|---------------------------|----------------------------------|------|
| ORF3a     | 14 | FVRATATIPIQASLP      | 99.37%<br>(478/481) | Non-Toxin | DPA1*02:01/DPB1*14:01     | NetMHCIIpan                      | 0.12 |
| ORF3a     | 15 | LLFVTVYSHLLLVAA      | 97.08%<br>(467/481) | Non-Toxin | DRB1*01:01                | Consensus<br>(comb.lib./simm/nn) | 0.1  |
| ORF6      | 16 | FKVSIWNLDYIINLI      | 99.38%<br>(478/481) | Non-Toxin | DQA1*01:01/DQB1*05:01     | Consensus<br>(comb.lib./simm/nn) | 0.02 |
| ORF6      | 17 | KVSIWNLDYIINLII      | 99.38%<br>(478/481) | Non-Toxin | DQA1*01:01/DQB1*05:01     | Consensus<br>(comb.lib./simm/nn) | 0.02 |
| ORF6      | 18 | TFKVSIWNLDYIINL**    | 99.38%<br>(478/481) | Non-Toxin | DQA1*01:01/DQB1*05:01     | Consensus<br>(comb.lib./simm/nn) | 0.02 |
| ORF7a     | 19 | IILFLALITLATCEL      | 99.79%<br>(479/480) | Non-Toxin | DRB1*01:01                | Consensus<br>(comb.lib./simm/nn) | 0.16 |
| ORF7a     | 20 | ILFLALITLATCELY      | 99.79%<br>(479/480) | Non-Toxin | DRB1*01:01                | Consensus<br>(comb.lib./simm/nn) | 0.16 |
| ORF7b     | 21 | CFLAFLFLVLIMLI       | 97.88%<br>(231/236) | Non-Toxin | DPA1*03:01/DPB1*04:02     | Consensus<br>(comb.lib./simm/nn) | 0.03 |
| ORF7b     | 22 | LCFLAFLFLVLIML       | 97.88%<br>(231/236) | Non-Toxin | DPA1*03:01/DPB1*04:02     | Consensus<br>(comb.lib./simm/nn) | 0.02 |
| ORF7b     | 23 | YLCFLAFLFLVLIM       | 97.88%<br>(231/236) | Non-Toxin | DPA1*03:01/DPB1*04:02     | Consensus<br>(comb.lib./simm/nn) | 0.02 |
| ORF8      | 24 | CTQHQPYYVDDPCPI      | 99.17%<br>(476/480) | Non-Toxin | DRB3*01:01                | Consensus<br>(comb.lib./simm/nn) | 0.08 |
| ORF8      | 25 | HQPYYVDDPCPIHFY      | 99.17%<br>(476/480) | Non-Toxin | DRB3*01:01                | Consensus<br>(comb.lib./simm/nn) | 0.08 |
| ORF8      | 26 | QPYVDDPCPIHFYS       | 99.17%<br>(476/480) | Non-Toxin | DRB3*01:01                | Consensus<br>(comb.lib./simm/nn) | 0.07 |
| ORF10     | 27 | INVFAFPFTIYSLLL      | 99.17%<br>(476/480) | Non-Toxin | HLA-DPA1*01:03/DPB1*02:01 | Consensus<br>(comb.lib./simm/nn) | 0.29 |
| ORF10     | 28 | YINVFAFPFTIYSLL      | 99.37%<br>(476/479) | Non-Toxin | DPA1*01:03/DPB1*02:01     | Consensus<br>(comb.lib./simm/nn) | 0.29 |
| S protein | 29 | KTQSLIVN NATNVV      | 100%<br>(472/472)   | Non-Toxin | DRB1*13:02                | Consensus<br>(simm/nn/sturniolo) | 0.01 |
| S protein | 30 | LLIVN NATNVV I KVC   | 99.36%<br>(469/472) | Non-Toxin | DRB1*13:02                | Consensus<br>(simm/nn/sturniolo) | 0.01 |
| S protein | 31 | QSLIVN NATNVV I K    | 99.79%<br>(471/472) | Non-Toxin | DRB1*13:02                | Consensus<br>(simm/nn/sturniolo) | 0.01 |
| S protein | 32 | SLIVN NATNVV I K V** | 99.79%<br>(471/472) | Non-Toxin | DRB1*13:02                | Consensus<br>(simm/nn/sturniolo) | 0.01 |
| S protein | 33 | TQSLIVN NATNVV I     | 99.79%<br>(471/472) | Non-Toxin | DRB1*13:02                | Consensus<br>(simm/nn/sturniolo) | 0.01 |

641

642

643 *Population Coverage by CTL and HTL epitopes.* The population coverage by the

644 shortlisted epitopes was also studied, in particular involving China, France, Italy,

645 United States of America, South Asia, East Asia, Northeast Asia, and the Middle

646 East. From this study, we may conclude that the combined use of all the

647 shortlisted CTL and HTL epitopes would have an average worldwide population

648 coverage as high as 96.10%, with a standard deviation of 23.74 (Table 3).

649

650 **Table 3. World population coverage by the shortlisted SARS-CoV-2 CTL and HTL**

651 **epitopes combined.** With a standard deviation of 23.74 on an average 96.10 % of the

652 world population could be covered by the joint administration of selected CTL and HTL

653 epitopes (given in Table 1 and 2) as vaccine candidates.

654  
655  
656  
657  
658  
659

a projected population coverage

b average number of epitope hits / HLA combinations recognized by the population

c minimum number of epitope hits / HLA combinations recognized by 90% of the population

| Population/area          | Class I and II combined |                          |                   |
|--------------------------|-------------------------|--------------------------|-------------------|
|                          | % coverage <sup>a</sup> | average_hit <sup>b</sup> | pc90 <sup>c</sup> |
| Algeria                  | 27.85%                  | 1.51                     | 0.69              |
| American Samoa           | 70.35%                  | 1.93                     | 0.34              |
| Argentina                | 96.78%                  | 3.56                     | 1.35              |
| Australia                | 79.62%                  | 2.73                     | 0.49              |
| Austria                  | 99.28%                  | 7.17                     | 2.74              |
| Belgium                  | 97.21%                  | 4.63                     | 1.71              |
| Bolivia                  | 35.81%                  | 2.14                     | 0.77              |
| Brazil                   | 92.28%                  | 3.69                     | 1.15              |
| Bulgaria                 | 95.49%                  | 4.48                     | 1.64              |
| Burkina Faso             | 61.26%                  | 1.3                      | 0.26              |
| Cameroon                 | 88.90%                  | 2.71                     | 0.9               |
| Cape Verde               | 98.02%                  | 5.71                     | 2.07              |
| Central Africa           | 87.66%                  | 3.35                     | 0.81              |
| Central African Republic | 36.40%                  | 1.25                     | 0.16              |
| Chile                    | 90.76%                  | 4.36                     | 1.06              |
| China                    | 90.43%                  | 4.74                     | 1.05              |
| Colombia                 | 24.90%                  | 1.18                     | 0.27              |
| Congo                    | 29.65%                  | 1.58                     | 0.64              |
| Cook Islands             | 22.52%                  | 1.33                     | 0.65              |
| Croatia                  | 97.46%                  | 5.28                     | 1.97              |
| Cuba                     | 97.36%                  | 6.08                     | 2.03              |
| Czech Republic           | 98.68%                  | 5.99                     | 2.31              |
| Denmark                  | 59.30%                  | 3.61                     | 1.23              |
| East Africa              | 90.29%                  | 3.46                     | 1.02              |
| East Asia                | 93.23%                  | 5.49                     | 1.29              |
| England                  | 99.45%                  | 7.37                     | 3.14              |
| Equatorial Guinea        | 15.47%                  | 0.81                     | 0.58              |
| Ethiopia                 | 34.14%                  | 1.72                     | 0.71              |
| Europe                   | 98.35%                  | 6.12                     | 2.32              |
| Finland                  | 99.58%                  | 5.27                     | 2.46              |
| France                   | 98.20%                  | 6.39                     | 2.31              |
| Georgia                  | 93.92%                  | 4.08                     | 1.31              |
| Germany                  | 99.34%                  | 7.17                     | 2.92              |
| Greece                   | 26.34%                  | 1.51                     | 0.68              |
| Guinea-Bissau            | 95.03%                  | 4.49                     | 1.37              |
| Hong Kong                | 84.82%                  | 2.7                      | 0.66              |
| India                    | 86.82%                  | 3.86                     | 0.76              |
| Indonesia                | 78.44%                  | 2.93                     | 0.46              |
| Iran                     | 94.14%                  | 4.47                     | 1.45              |
| Ireland Northern         | 99.55%                  | 7.7                      | 3.3               |

|                       |        |      |      |
|-----------------------|--------|------|------|
| Ireland South         | 99.28% | 7.31 | 3.16 |
| Israel                | 84.33% | 3.49 | 0.64 |
| Italy                 | 96.70% | 4.11 | 1.74 |
| Ivory Coast           | 65.09% | 1.16 | 0.29 |
| Japan                 | 92.78% | 5.3  | 1.23 |
| Jordan                | 85.10% | 3.54 | 0.67 |
| Kenya                 | 86.65% | 2.27 | 0.75 |
| Korea; South          | 95.79% | 6.18 | 1.72 |
| Macedonia             | 43.69% | 2.18 | 0.18 |
| Malaysia              | 80.94% | 3.79 | 0.52 |
| Mali                  | 95.75% | 2.67 | 1.3  |
| Martinique            | 43.47% | 1.8  | 0.18 |
| Mexico                | 93.68% | 3.6  | 1.35 |
| Mongolia              | 87.03% | 4.25 | 0.77 |
| Morocco               | 97.32% | 5.55 | 2.01 |
| Netherlands           | 40.49% | 2.35 | 0.84 |
| New Caledonia         | 61.85% | 2.73 | 0.26 |
| New Zealand           | 24.11% | 1.39 | 0.66 |
| Niue                  | 20.26% | 1.2  | 0.63 |
| North Africa          | 94.14% | 4.19 | 1.3  |
| North America         | 97.36% | 6    | 2.09 |
| Northeast Asia        | 90.30% | 4.71 | 1.04 |
| Norway                | 52.39% | 3.08 | 1.05 |
| Oceania               | 75.64% | 3.29 | 0.41 |
| Oman                  | 94.27% | 3.2  | 1.35 |
| Pakistan              | 85.00% | 2.54 | 0.67 |
| Papua New Guinea      | 71.23% | 3.29 | 0.35 |
| Peru                  | 95.12% | 3.38 | 1.52 |
| Philippines           | 67.23% | 1.92 | 0.61 |
| Poland                | 98.46% | 6.18 | 2.36 |
| Portugal              | 96.27% | 5.25 | 1.75 |
| Romania               | 95.90% | 3.54 | 1.56 |
| Russia                | 94.88% | 5.26 | 1.49 |
| Rwanda                | 45.12% | 1.85 | 0.18 |
| Samoa                 | 43.64% | 2.65 | 0.89 |
| Sao Tome and Principe | 96.32% | 4.15 | 1.54 |
| Saudi Arabia          | 96.53% | 4.87 | 1.65 |
| Scotland              | 73.06% | 4.19 | 0.37 |
| Senegal               | 94.11% | 3.54 | 1.24 |
| Serbia                | 62.91% | 1.07 | 0.27 |
| Singapore             | 86.92% | 4.37 | 0.76 |
| Slovenia              | 43.37% | 2.58 | 0.88 |
| South Africa          | 88.81% | 2.6  | 0.89 |
| South America         | 81.68% | 2.95 | 0.55 |
| South Asia            | 90.37% | 4.25 | 1.03 |
| Southeast Asia        | 82.33% | 3.79 | 0.57 |



660  
661  
662  
663  
664  
665  
666  
667  
668  
669  
670  
671  
672  
673  
674  
675  
676  
677  
678  
679  
680  
681  
682  
683  
684  
685  
686  
687  
688  
689  
690  
691  
692  
693  
694

|                           |               |             |             |
|---------------------------|---------------|-------------|-------------|
| Southwest Asia            | 86.38%        | 3.13        | 0.73        |
| Spain                     | 87.57%        | 3.8         | 0.8         |
| Sri Lanka                 | 52.39%        | 1.59        | 0.42        |
| Sudan                     | 87.98%        | 2.69        | 0.83        |
| Sweden                    | 99.29%        | 7.32        | 2.59        |
| Taiwan                    | 84.93%        | 4.28        | 0.66        |
| Thailand                  | 91.26%        | 4.81        | 1.17        |
| Tonga                     | 33.43%        | 1.98        | 0.69        |
| Tunisia                   | 94.64%        | 4.17        | 1.38        |
| Turkey                    | 61.05%        | 2.54        | 0.51        |
| Uganda                    | 92.00%        | 2.99        | 1.13        |
| United States             | 97.45%        | 6.04        | 2.11        |
| Venezuela                 | 69.56%        | 1.16        | 0.33        |
| Vietnam                   | 86.19%        | 4.11        | 0.72        |
| West Africa               | 94.34%        | 4.44        | 1.32        |
| West Indies               | 96.71%        | 5.04        | 1.74        |
| Zambia                    | 97.50%        | 3.1         | 1.67        |
| Zimbabwe                  | 93.60%        | 3.4         | 1.21        |
|                           |               |             |             |
| <b>World</b>              | <b>96.10%</b> | <b>5.55</b> | <b>1.8</b>  |
|                           |               |             |             |
| <b>Average</b>            | <b>78.62</b>  | <b>3.73</b> | <b>1.16</b> |
| <b>Standard deviation</b> | <b>23.74</b>  | <b>1.67</b> | <b>0.73</b> |

### ***B Cell epitope prediction***

695 *Sequence-based B Cell epitope prediction.* To screen B cell epitopes we utilized  
696 the Bepipred Linear Epitope Prediction method. In our study, we screened 12 B  
697 cell epitopes, from eleven SARS-CoV-2 proteins, which show partial or complete  
698 overlap with shortlisted CTL and HTL epitope (Table 4). Another 206 B Cell  
699 epitope, with the epitope length of at least four amino acids and maximum 20  
700 amino acids were screened and are listed in Supplementary table S11.

701  
702  
703  
704  
705  
706  
707

**Table 4. Shortlisted SARS-CoV-2 B Cell epitopes.** BepiPred Linear B Cell epitopes showing sequence overlap with CTL and HTL epitopes are shortlisted. *In-silico* analysis has shown all the selected epitopes to be non-toxic (Non-Toxin) as well as they show significant amino acid sequence conservancy.



708

| SARS-CoV-2 Proteins | S.No | Overlapping B Cell Epitope (BepiPred method)                      | Conservancy      | Length | Toxicity  |
|---------------------|------|-------------------------------------------------------------------|------------------|--------|-----------|
| M protein           | 1    | KL GASQRVAGDS                                                     | 98.74% (471/477) | 12     | Non-Toxin |
| N protein           | 2    | RLNQLESKMSGKGQQQGQTVTKKSAEASK<br>KPRQKRTATKA                      | 96.99% (483/498) | 42     | Non-Toxin |
| ORF1ab              | 3    | GTTQACTDDNALAYYNTTK                                               | 99.78% 455/456   | 20     | Non-Toxin |
| ORF3a               | 4    | QGEIKDATPSDF                                                      | 99.37% (478/481) | 12     | Non-Toxin |
| ORF3a               | 5    | PYNSVT                                                            | 97.92% (471/481) | 6      | Non-Toxin |
| ORF7a               | 6    | LYHYQECVR                                                         | 99.79% (479/480) | 9      | Non-Toxin |
| ORF7a               | 7    | VKHVYQLRARSVSPKLFIRQEEVQEL                                        | 97.92% (470/480) | 26     | Non-Toxin |
| ORF8                | 8    | QSCTQHQPYYVDDPCPIHFYSKW                                           | 95.83% (460/480) | 23     | Non-Toxin |
| ORF8                | 9    | RVGARKSAP                                                         | 99.17% (476/480) | 9      | Non-Toxin |
| S protein           | 10   | TPGDSSSGWTA                                                       | 99.58% (470/472) | 11     | Non-Toxin |
| S protein           | 11   | FPNITNLCPFGEVFNATRFASVYAWNRKRISNCVA                               | 99.58% (470/472) | 35     | Non-Toxin |
| S protein           | 12   | NLDSKVGGNYNYLYRLFRKSNLKPFERDISTEY<br>QAGSTPCNGVEGFNCYFPLQSYGFQPTN | 96.19% (454/472) | 62     | Non-Toxin |

709

710

## 711 **Characterization of potential epitopes**

712 *Epitope conservation analysis.* Sequence conservation analysis of the screened  
 713 CTL, HTL and B cell epitopes have shown highly conserved nature of the  
 714 shortlisted epitopes. Both the CTL epitopes and the HTL epitope were found to  
 715 be significantly conserved with their 100% amino acid sequence amongst the  
 716 NCBI retrieved protein sequences of SARS-CoV-2 (CTL epitopes 96.88% to  
 717 100% conserved and HTL epitopes were 97.08% to 100% conserved (Table 1, 2  
 718 4, Supplementary table S8, S9, S10 & S11).

719

720 *Epitope toxicity prediction.* Toxicity analysis of all the screened CTL, HTL and B  
 721 Cell epitopes was also performed. The ToxinPred study of all the shortlisted  
 722 epitopes shows that they all are non-toxic in nature (Table 1, 2 4, Supplementary  
 723 table S8, S9, S10 & S11).

724

725 *Overlapping residue analysis.* Amino acid sequence overlap analysis amongst  
726 the shortlisted CTL, HTL and B cell epitopes from eleven SARS-CoV-2 proteins  
727 was performed by the Multiple Sequence Alignment (MSA) analysis tool Clustal  
728 Omega. The analysis has shown that several epitopes of CTL, HTL and B cell  
729 were having amino acid sequences overlap. The CTL, HTL and B cell epitopes  
730 having two or more than two amino acid residues overlap are shown in Fig.2.

731

732

733

734

735

736

737

738

739

740

741

742

743

744

745

746

747

748  
749  
750  
751  
752  
753  
754  
755  
756  
757  
758  
759  
760  
761  
762  
763  
764  
765  
766  
767  
768  
769  
770

## Overlapping T & B cell epitopes across proteome of SARS-CoV-2

|                      |                                                                                                                                                                                                                                                                                                                                                                                                                                                                                                                                                                                                                                                                                                                                                                                                                                                                                                                                                                                                                                                                                                                                                                                                                                                                                                                                                                                                                                                                                                                                                                           |
|----------------------|---------------------------------------------------------------------------------------------------------------------------------------------------------------------------------------------------------------------------------------------------------------------------------------------------------------------------------------------------------------------------------------------------------------------------------------------------------------------------------------------------------------------------------------------------------------------------------------------------------------------------------------------------------------------------------------------------------------------------------------------------------------------------------------------------------------------------------------------------------------------------------------------------------------------------------------------------------------------------------------------------------------------------------------------------------------------------------------------------------------------------------------------------------------------------------------------------------------------------------------------------------------------------------------------------------------------------------------------------------------------------------------------------------------------------------------------------------------------------------------------------------------------------------------------------------------------------|
| ORF1ab               | <p> <span style="color: blue;">-IILASFSASTSAFVE</span><br/> <span style="color: blue;">AIIASFSASTSAFVE</span><br/>           474-489 AIIASFSASTSAFVE         </p> <p> <span style="color: blue;">---SPFVMSAPPAQYEL</span><br/> <span style="color: blue;">QESPFVMSAPPAQY--</span><br/> <span style="color: blue;">-ESPFVMSAPPAQYE-</span><br/>           1800-1816 QESPFVMSAPPAQYEL         </p> <p> <span style="color: red;">-----YILFRFFYV---</span><br/> <span style="color: blue;">WFLAYILFRFFYVL---</span><br/> <span style="color: blue;">---LAYILFRFFYVLGL-</span><br/> <span style="color: blue;">---FLAYILFRFFYVLG-</span><br/> <span style="color: blue;">---AYILFRFFYVLGLA</span><br/>           2327-2344 WFLAYILFRFFYVLGLA         </p> <p> <span style="color: red;">-----YIFFASFYV</span><br/> <span style="color: red;">RMYIFFASFY-</span><br/> <span style="color: red;">RMYIFFASFYV</span><br/>           2382-2393 RMYIFFASFYV         </p> <p> <span style="color: red;">-----CTDDNALAY-----</span><br/> <span style="color: red;">-----CTDDNALAY-----</span><br/> <span style="color: green;">GTTQACTDDNALAYNTTK</span><br/>           4157-4176 GTTQACTDDNALAYNTTK         </p> <p> <span style="color: blue;">RAMPNMLRIMASLVL---</span><br/> <span style="color: blue;">-----PNMLRIMASLVLARK-</span><br/> <span style="color: blue;">-----NMLRIMASLVLARKH</span><br/> <span style="color: blue;">---MPNMLRIMASLVLAR--</span><br/> <span style="color: blue;">--AMPNMLRIMASLVL---</span><br/>           5016-5034 RAMPNMLRIMASLVLARKH         </p> |
| Surface protein      | <p> <span style="color: blue;">-----LLIVNNATNVVIVKVC</span><br/> <span style="color: blue;">-----SLLIVNNATNVVIVKVC</span><br/> <span style="color: blue;">-----QSLIVNNATNVVIVK--</span><br/> <span style="color: blue;">---TQSLIVNNATNVVI---</span><br/> <span style="color: blue;">KTQSLIVNNATNVV---</span><br/>           113-131 KTQSLIVNNATNVVIVKVC         </p> <p> <span style="color: red;">-----WTAGAAAYV</span><br/> <span style="color: blue;">TPGDSSSGWTA-----</span><br/>           250-267 TPGDSSSGWTAGAAAYV         </p> <p> <span style="color: red;">FPNITNLCPF-----</span><br/> <span style="color: red;">FPNITNLCPFGEVFNATRFASVYAWNRKRISNCVA</span><br/> <span style="color: red;">FPNITNLCPFGEVFNATRFASVYAWNRKRISNCVA</span><br/>           329-363 FPNITNLCPFGEVFNATRFASVYAWNRKRISNCVA         </p> <p> <span style="color: red;">-----NYNYLRLFR-----</span><br/> <span style="color: red;">-----NYNYLRLFR-----</span><br/> <span style="color: green;">NLDKSVGGNYNYLRLFRKSNLKPFFERDISTEIQAGSTPCNGVEGFNCYFPLQSYGFQPTN</span><br/> <span style="color: green;">NLDKSVGGNYNYLRLFRKSNLKPFFERDISTEIQAGSTPCNGVEGFNCYFPLQSYGFQPTN</span><br/>           440-501 NLDKSVGGNYNYLRLFRKSNLKPFFERDISTEIQAGSTPCNGVEGFNCYFPLQSYGFQPTN         </p>                                                                                                                                                                                                                                                                                                                  |
| ORF3a                | <p> <span style="color: blue;">-----FVRATAPIQASLP</span><br/> <span style="color: blue;">QGEIKDATPSDF-----</span><br/>           17-42 QGEIKDATPSDFVRATAPIQASLP         </p> <p> <span style="color: red;">IPYNSVTSSI</span><br/> <span style="color: red;">-PYNSVT--</span><br/>           158-167 IPYNSVTSSI         </p>                                                                                                                                                                                                                                                                                                                                                                                                                                                                                                                                                                                                                                                                                                                                                                                                                                                                                                                                                                                                                                                                                                                                                                                                                                               |
| Envelope protein     | <p> <span style="color: red;">-LLFLAFVVF-----</span><br/> <span style="color: red;">-LLFLAFVVFLLVTLA</span><br/> <span style="color: red;">VLLFLAFVVFLLVTL-</span><br/> <span style="color: red;">VLLFLAFVVFLLVTLA</span><br/>           17-32         </p>                                                                                                                                                                                                                                                                                                                                                                                                                                                                                                                                                                                                                                                                                                                                                                                                                                                                                                                                                                                                                                                                                                                                                                                                                                                                                                               |
| Membrane Protein     | <p> <span style="color: red;">-----YFIASFRLFAR</span><br/> <span style="color: blue;">-LMWLSYFIASFRLF-</span><br/> <span style="color: blue;">GLMWLSYFIASFRLF-</span><br/>           89-105 GLMWLSYFIASFRLFAR         </p> <p> <span style="color: red;">ATSRTLSSYK-----</span><br/> <span style="color: blue;">-----LSYKLGASQRVAGD-</span><br/> <span style="color: blue;">-----KLGASQRVAGDS</span><br/>           171-197 ATSRTLSSYKLGASQRVAGDS         </p>                                                                                                                                                                                                                                                                                                                                                                                                                                                                                                                                                                                                                                                                                                                                                                                                                                                                                                                                                                                                                                                                                                            |
| ORF6                 | <p> <span style="color: red;">AEILLIMRTF-----</span><br/> <span style="color: red;">-----RTFKVSIW-----</span><br/> <span style="color: blue;">-----KVSINWLDYIINLI</span><br/> <span style="color: blue;">-----FKVSIWLDYIINLI-</span><br/> <span style="color: blue;">-----TFKVSINWLDYIINLI-</span><br/>           12-37 AEILLIMRTFKVSIWLDYIINLI         </p>                                                                                                                                                                                                                                                                                                                                                                                                                                                                                                                                                                                                                                                                                                                                                                                                                                                                                                                                                                                                                                                                                                                                                                                                              |
| ORF7a                | <p> <span style="color: blue;">-ILFLALITLATCELY-----</span><br/> <span style="color: blue;">IILFLALITLATCEL</span><br/> <span style="color: blue;">-----LYHYQECVR</span><br/>           3-25 IILFLALITLATCELYHYQECVR         </p> <p> <span style="color: red;">-----RARSVSPK-----</span><br/> <span style="color: red;">-----QLRARSVSPK-----</span><br/> <span style="color: blue;">VKHVVQLRARSVSPKLFIRQEEVQEL</span><br/>           71-96 VKHVVQLRARSVSPKLFIRQEEVQEL         </p>                                                                                                                                                                                                                                                                                                                                                                                                                                                                                                                                                                                                                                                                                                                                                                                                                                                                                                                                                                                                                                                                                       |
| ORF7b                | <p> <span style="color: red;">-----FLAFLFLV-----</span><br/> <span style="color: blue;">---CFLAFLFLVLIIMI</span><br/> <span style="color: blue;">-LCFLAFLFLVLIIM-</span><br/> <span style="color: blue;">YLCFLAFLFLVLIIM-</span><br/>           10-26 YLCFLAFLFLVLIIMI         </p>                                                                                                                                                                                                                                                                                                                                                                                                                                                                                                                                                                                                                                                                                                                                                                                                                                                                                                                                                                                                                                                                                                                                                                                                                                                                                       |
| ORF8                 | <p> <span style="color: red;">-----HFYSKWYIR-----</span><br/> <span style="color: blue;">-----QPYYVDDPCPIHFYS</span><br/> <span style="color: blue;">-----HQPYVDDPCPIHFY</span><br/> <span style="color: blue;">-----CTQHQPYYVDDPCPI-----</span><br/> <span style="color: blue;">QSQTHQPYYVDDPCPIHFYSKW-----</span><br/> <span style="color: blue;">-----RVGARKSAP</span><br/>           23-56 QSQTHQPYYVDDPCPIHFYSKWYIRVGARKSAP         </p>                                                                                                                                                                                                                                                                                                                                                                                                                                                                                                                                                                                                                                                                                                                                                                                                                                                                                                                                                                                                                                                                                                                             |
| Nucleocapsid Protein | <p> <span style="color: red;">-----KPRQKRTAT-</span><br/> <span style="color: blue;">RLNQLSKMSGKGGQQGQTVTKKSAEASKKPRQKRTATKA</span><br/>           226-267 RLNQLSKMSGKGGQQGQTVTKKSAEASKKPRQKRTATKA         </p> <p> <span style="color: blue;">-----AQFAPSASAFFGMSR</span><br/> <span style="color: blue;">---JAQFAPSASAFFGMS-</span><br/> <span style="color: blue;">PQIAQFAPSASAFFG---</span><br/>           302-319 PQIAQFAPSASAFFGMSR         </p>                                                                                                                                                                                                                                                                                                                                                                                                                                                                                                                                                                                                                                                                                                                                                                                                                                                                                                                                                                                                                                                                                                                    |
| ORF10                | <p> <span style="color: red;">---GYINVAFPF-----</span><br/> <span style="color: red;">MGYINVAF-----</span><br/> <span style="color: blue;">---YINVAFPFPTIYSLL</span><br/>           1-17 MGYINVAFPFPTIYSLL         </p>                                                                                                                                                                                                                                                                                                                                                                                                                                                                                                                                                                                                                                                                                                                                                                                                                                                                                                                                                                                                                                                                                                                                                                                                                                                                                                                                                   |

771 **Figure 3. Overlapping SARS-CoV-2 CTL, HTL and B cell epitopes.** Multiple  
772 sequence alignment performed by Clustal Omega at EBI to identify the  
773 consensus overlapping regions of CTL (red), HTL (blue) and B cell epitopes  
774 (green) amongst shortlisted epitopes. Epitopes with overlapping regions amongst  
775 all the three types of epitopes (CTL, HTL and B Cell epitopes) were chosen for  
776 further studies (encircled).

777

778 *Epitope selected for molecular interaction study with HLA allele and TAP*  
779 *transporter.* The epitopes showing overlap amongst all the three types of  
780 epitopes i.e CTL, HTL and B cell epitopes have been encircled in Fig.2 and are  
781 chosen for further study for their interaction with HLA allele and TAP (Transporter  
782 Associated with Antigen Processing) transporter.

783

784 **Molecular interaction analysis of selected epitopes with HLA allele and TAP**  
785 **transporter.**

786 *Molecular interaction analysis of chosen CTL and HTL epitopes with HLA alleles.*

787 The molecular docking study of chosen CTL and HTL epitopes with their  
788 respective HLA class I and II allele binders was performed by PatchDock tool.  
789 The study revealed a significant molecular interaction between all the chosen  
790 epitopes and their HLA allele binders showing multiple hydrogen bond formations  
791 (Fig.3). Furthermore, the B-factor analysis of all the epitope-HLA allele  
792 complexes has also shown the epitope ligand to have stable (blue) binding  
793 conformation in complex with the HLA allele molecule (VIBGYOR color

794 presentation, blue being very stable) Fig.4.

795

796

797

798

799

800

801

802

803

804

805

806

807

808

809

810

811

812

813

814

815

816

817

818

819

820

821

822

823

824

825

826

827

828

829

830

831

832

833

834

835

836

837

838

839

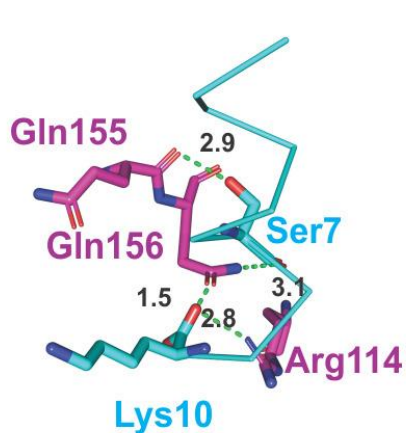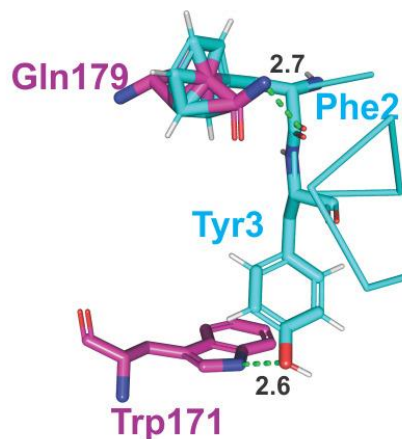

1. ATSRTLSYYK-HLA-A\*11:01

2. HFYSKWYIR-HLA-A\*31:01

### CTL epitopes - HLA Class I allele complexes

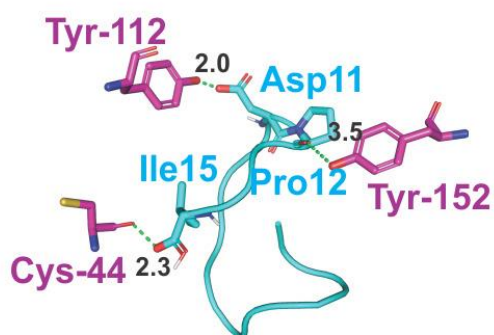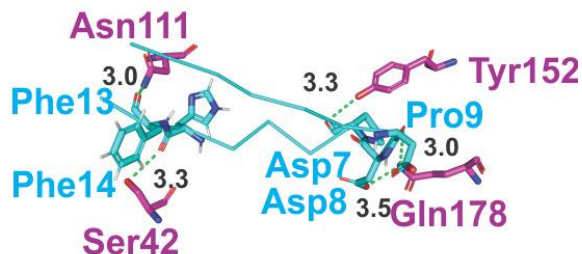

3. CTQHQPYYVDDPCPI-HLA-DRB3\*01:01

4. HQPYYVDDPCPIHFY-HLA-DRB3\*01:01

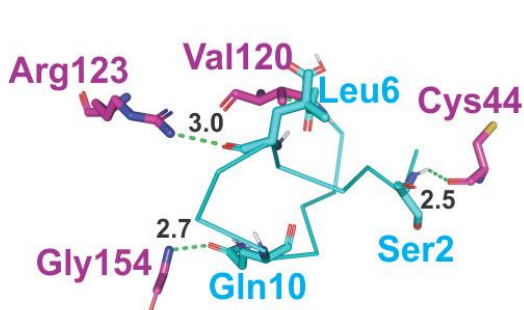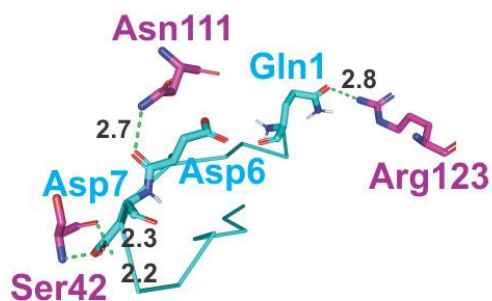

5. LSYYKLGASQRVAGD-HLA-DRB1\*09:01

6. QPYYVDDPCPIHFYS-HLA-DRB3\*01:01

### HTL epitopes - HLA Class II allele complexes

840 **Figure 4. Molecular Docking analysis of SARS-CoV-2 CTL epitopes and**  
841 **HLA alleles.** Molecular docking of chosen CTL and HTL epitopes (cyan sticks)  
842 with binding amino acid residues of their respective HLA class I and class II allele  
843 binders (magenta sticks). The study shows the docked complexes to form a  
844 stable complex with multiple hydrogen bonds (green dots, lengths in Angstroms)  
845 formation. Images were generated by the PyMOL Molecular Graphics System,  
846 Version 2.0 Schrödinger, LLC.

847

848

849

850

851

852

853

854

855

856

857

858

859

860

861

862



863

864

865

866

867

868

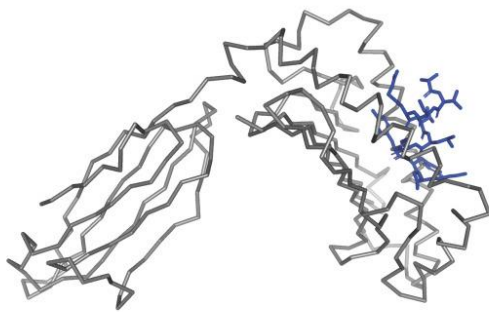

1. ATSRTLSYYK-HLA-A\*11:01

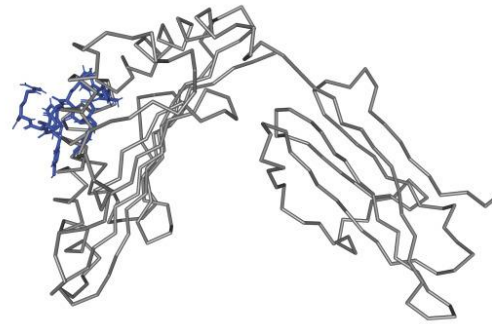

2. HFYSKWYIR-HLA-A\*31:01

869

870

### CTL epitopes - HLA Class I allele complexes

871

872

873

874

875

876

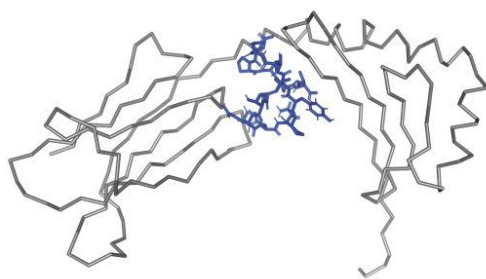

3. CTQHQPYYVDDPCPI-HLA-DRB3\*01:01

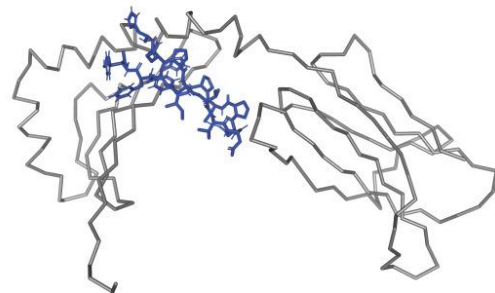

4. HQPYVDDPCPIHFY-HLA-DRB3\*01:01

877

878

879

880

881

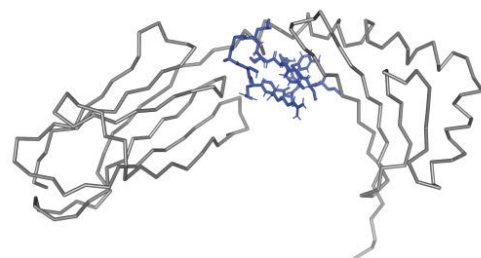

5. LSYYKLGASQRVAGD-HLA-DRB1\*09:01

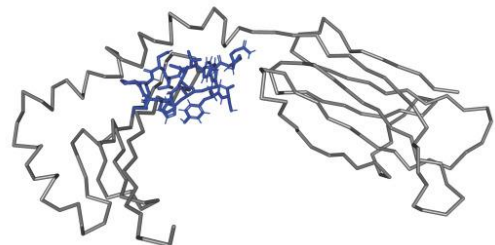

6. QPYVDDPCPIHFYS-HLA-DRB3\*01:01

882

883

### HTL epitopes - HLA Class II allele complexes

884

885



886 **Figure 5. B-Factor of CTL and HTL epitope in complex with HLA class I and II**  
887 **allele.** CTL and HTL Epitopes are shown in sticks and HLA Class I and II alleles are  
888 shown in ribbon. The HLA alleles are shown in gray. The regions of the epitope in the  
889 complex are shown in a rainbow (VIBGYOR), the regions in blue being very stable and  
890 the region towards red being relatively unstable. In the complexes shown above, most of  
891 the regions of epitopes are in blue indicating the complexes to be highly stable.

892

893 *Molecular interaction analysis of selected CTL epitopes with TAP transporter.*

894 The molecular docking interaction analysis of the chosen CTL epitopes with the  
895 TAP transporter cavity has shown a significantly strong molecular interaction with  
896 several hydrogen bonds formation at different sites of the TAP transporter cavity.  
897 Two sites of interaction were of particular interest, one closer to the cytoplasmic  
898 end and another closer to the ER lumen (Fig.5). This study confirms the  
899 feasibility of transportation of chosen CTL epitopes from the cytoplasm to the ER  
900 lumen which is an essential event for the representation of epitope by the HLA  
901 allele molecules on the surface of antigen- presenting cells.

902

903

904

905

906

907

908

Epitope **ATSR**TL**SY**YK through TAP cavity

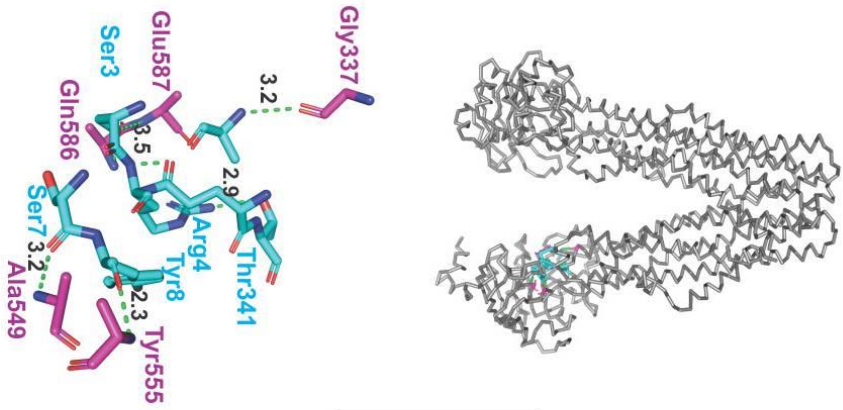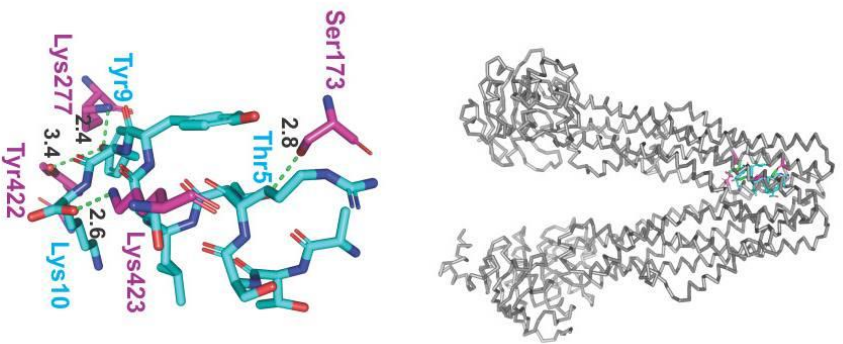

Epitope **HF**YSKWYIR through TAP cavity

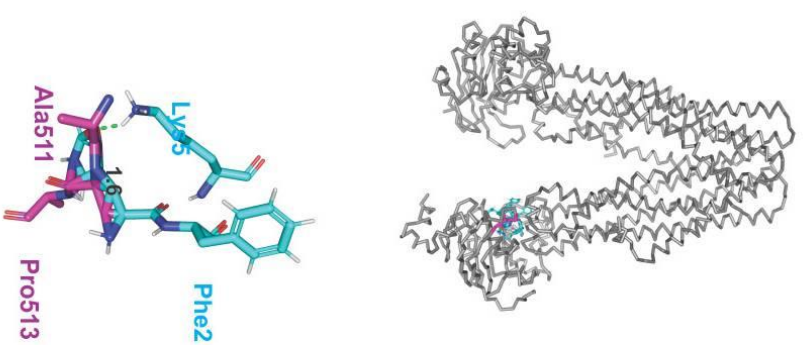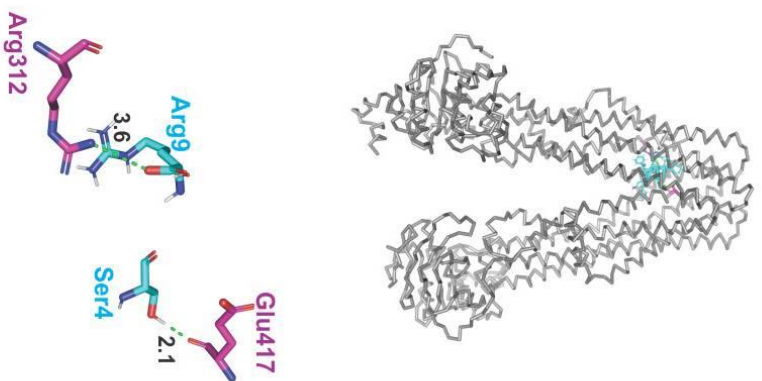

909  
910  
911  
912  
913  
914  
915  
916  
917  
918  
919  
920  
921  
922  
923  
924  
925  
926  
927  
928  
929  
930  
931

932 **Figure 6. Molecular docking analysis of CTL epitopes within the TAP**  
933 **transporter cavity.** Molecular interaction of CTL epitopes (cyan sticks) within the  
934 TAP cavity (gray ribbon/sticks) is shown. Detailed interaction between the  
935 residues of epitopes and TAP transporter residues have been shown with  
936 hydrogen formation shown with green dots. H bonds are shown in green dots  
937 with lengths in Angstroms.

938

939 **Characterization and molecular interaction analysis of designed Multi-**  
940 **Epitope Vaccines with immune receptor**

941 ***Characterization of designed Multi-Epitope Vaccines***

942 *Physicochemical property analysis of designed MEVs.* ProtParam analysis for  
943 both the CTL and HTL MEVs was performed to analyze their physicochemical  
944 properties. The empirical physicochemical properties of the CTL and HTL MEVs  
945 are given in the table 5. The aliphatic index and grand average of hydropathicity  
946 (GRAVY) of both the MEVs indicate the globular and hydrophilic nature of both  
947 the MEVs. The instability index score of both the MEVs indicates the stable  
948 nature of the protein molecules (Table 5).

949

950

951

952

953

954

955 **Table 5. Physicochemical property analysis based on amino acid sequence**  
956 **of designed CTL and HTL multi-epitope vaccine.**

| <b><u>MEVs</u></b>    | <b>Amino acid length</b> | <b>Molecular Weight</b> | <b>Theoretical pI</b> | <b>Expected half-life</b>                              | <b>Aliphatic index</b> | <b>Grand average of hydrophobicity (GRAVY)</b> | <b>Instability index score</b> |
|-----------------------|--------------------------|-------------------------|-----------------------|--------------------------------------------------------|------------------------|------------------------------------------------|--------------------------------|
| <b><u>CTL MEV</u></b> | 704 aa                   | 72.62 kDa               | 9.70                  | E.Coli: 10 Hr<br>Yeast: 30 Hr<br>Mammalian cell: 20 Hr | 61.09                  | -0.090                                         | 44.31                          |
| <b><u>HTL MEV</u></b> | 810 aa                   | 82.80 kDa               | 8.64                  | Coli: 10 Hr<br>Yeast: 30 Hr<br>Mammalian cell: 20 Hr   | 96.43                  | 0.501                                          | 40.28                          |

957

958

959 *Interferon-gamma inducing epitope prediction.* Interferon-gamma (IFN- $\gamma$ )  
960 inducing epitopes are involved in both the adaptive as well as in the innate  
961 immune response. The IFN- $\gamma$  inducing 15 mer peptide epitopes were screened  
962 from the amino acid sequence of CTL and HTL MEVs by utilizing the IFNepitope  
963 server. A total of 20 CTL MEV and 20 HTL MEV INF- $\gamma$  inducing POSITIVE  
964 epitopes with a score of 1 or more than 1 were shortlisted (Supplementary table  
965 S2).

966

967

968

969

970

971

972

973

974

975

976

977

978

979

980

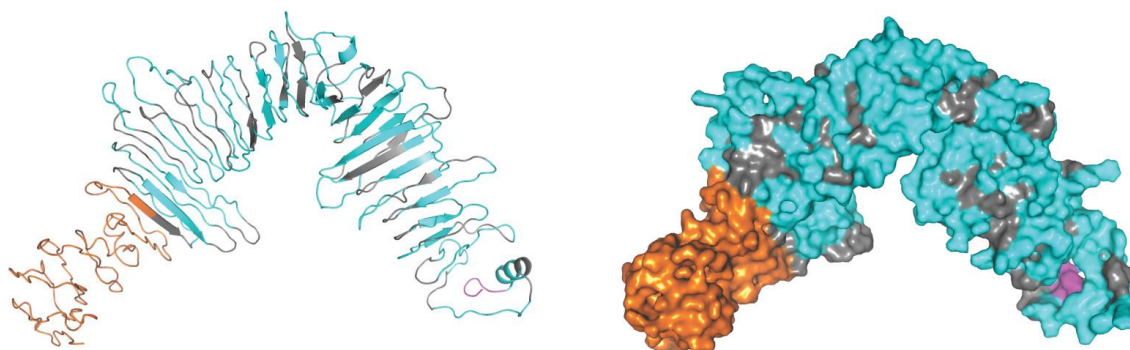

### A. CTL Multi-epitope vaccine model

981

982

983

984

985

986

987

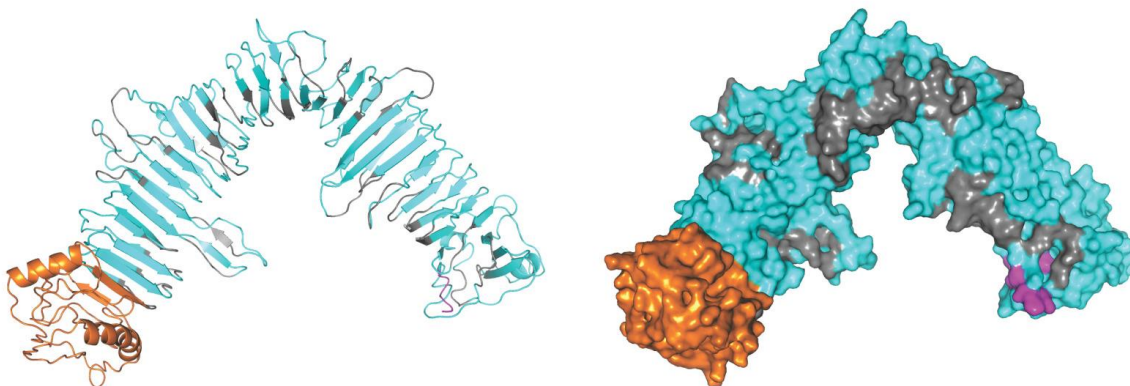

### B. HTL Multi-epitope vaccine model

988

989

990 **Figure 7. Tertiary structure modelling of CTL and HTL Multi-Epitope**

991 **Vaccines.** Tertiary structural models of CTL and HTL MEVs have been shown.

992 The epitopes are shown in cyan. The adjuvant (Ov-ASP-1) is shown in orange.

993 The linkers are shown in gray and 6xHis tag is shown in magenta. Both the

994 cartoon and surface presentation of both the MEVs are shown.



995  
996  
997  
998  
999  
1000  
1001  
1002  
1003  
1004  
1005  
1006  
1007  
1008  
1009  
1010  
1011  
1012  
1013  
1014  
1015  
1016  
1017

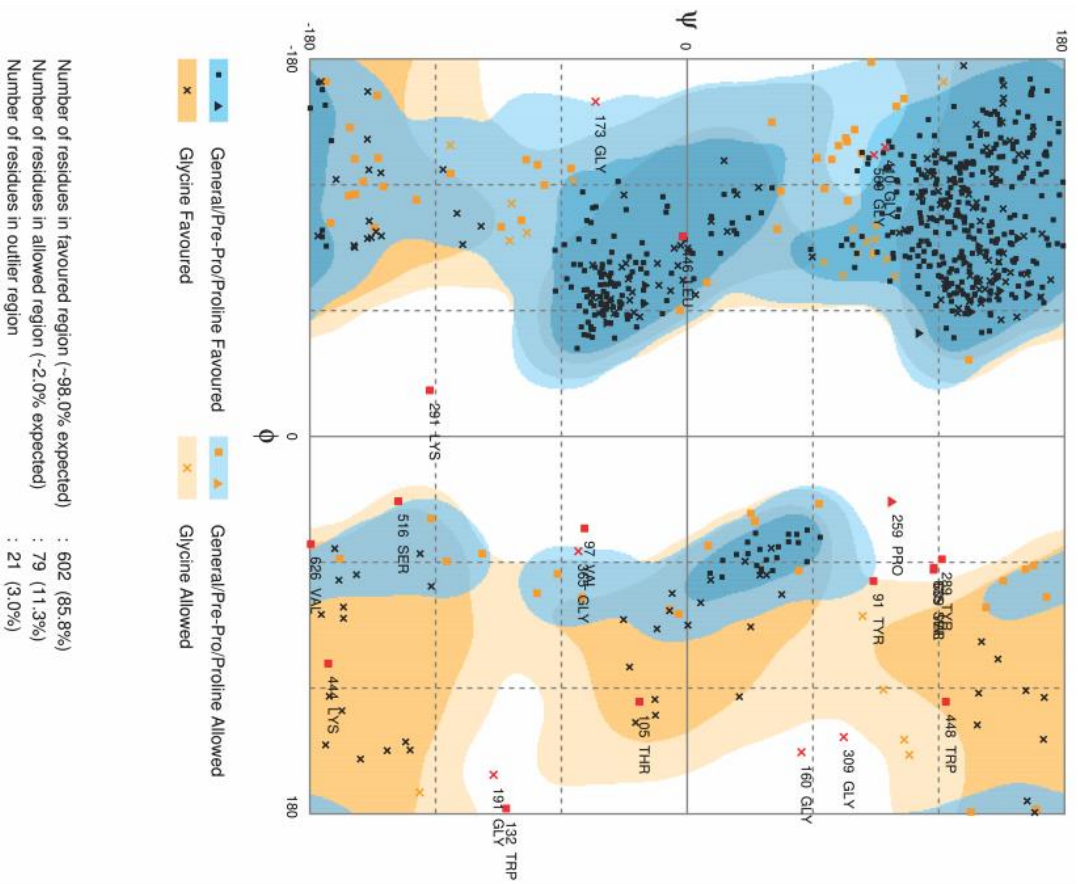

**A. CTL Multi-epitope vaccine RAMPAGE analysis**

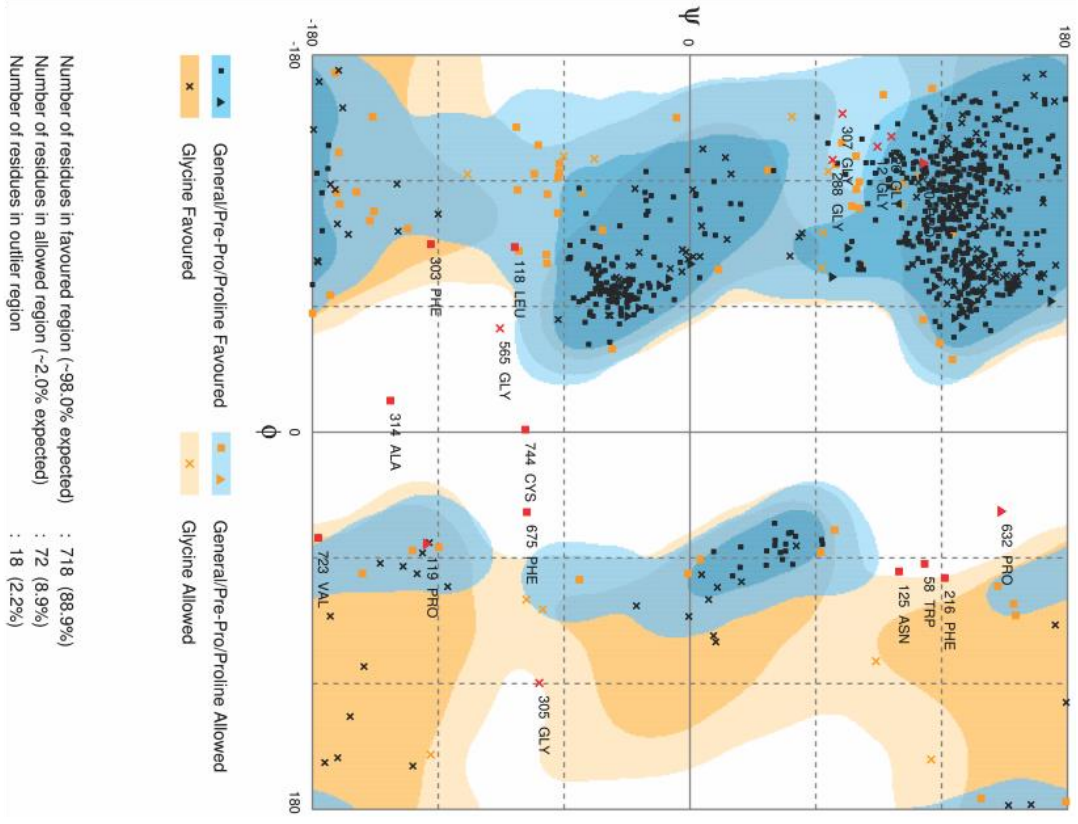

**B. HTL Multi-epitope vaccine model RAMPAGE analysis**

1018 **Figure 8. RAMPAGE analysis of CTL and HTL MEVs.** The RAMPAGE analysis  
1019 of both the CTL and HTL MEVs has been done and shown here.

1020

1021 *MEVs allergenicity and antigenicity prediction.* Both the CTL and HTL MEVs  
1022 were found to be NON-ALLERGEN by the AlgPred analysis (scoring -  
1023 0.95185601 and -1.1293352 respectively; threshold being -0.4). The CTL and  
1024 HTL MEVs were also analyzed by VaxiJen to be probable ANTIGENS (prediction  
1025 score 0.4485 and 0.4215 respectively; default threshold being 0.4). Hence with  
1026 the mentioned analysis tools both the CTL and HTL MEVs are predicted to be  
1027 non-allergic as well as potentially antigenic in nature.

1028

1029 *Tertiary structure modeling and refinement of MEVs.* 3D homology models were  
1030 generated for both the CTL and HTL MEVs by utilizing the I-TASSER modeling  
1031 tool (Fig.7). The models were generated for CTL Multi-epitope vaccine (PDB hit  
1032 5n8pA, Norm. Z-score of 1.49, Cov of 0.92, TM-score of 0.916 and RMSD of  
1033 1.04 Å) and HTL Multi-epitope vaccine (PDB hit 5n8pA, Norm. Z-score of 1.52,  
1034 Cov of 0.97, TM-score of 0.916 and RMSD of 1.04 Å).

1035 Both the generated CTL and HTL 3D models were further refined by  
1036 ModRefiner to fix any gaps and then followed by GalaxyRefine refinement. The  
1037 refinement by ModRefiner showed the TM-score of 0.9189 and 0.9498 for the  
1038 CTL and HTL models respectively, hence being close to 1, the initial and the  
1039 refined models were structurally similar. After refinement, the RMSD for CTL and  
1040 HTL models with respect to the initial model was 3.367Å and 2.318Å

1041 respectively. Further, both the CTL and HTL MEVs models were refined by  
1042 GalaxyRefine and model 1 was chosen based on best scorings parameters. The  
1043 CTL MEV model refinement output model (Rama favoured was 83.6%, GDT-HA  
1044 was 0.9371, RMSD was 0.459, MolProbity was 2.539, Clash score was 23.2, and  
1045 Poor rotamers was 1.8) and the HTL MEV model refinement output model (Rama  
1046 favoured was 87.7%, GDT-HA was 0.9552, RMSD was 0.402, MolProbity was  
1047 2.537, Clash score was 27.9, and Poor rotamers was 1.6) show a well-refined  
1048 and acceptable models for both of the MEVs. After refinement, all the mentioned  
1049 parameters have found to be improved significantly in comparison to the initial  
1050 CTL and HTL MEV models (Supplementary table S3).

1051

1052 *Validation of CTL and HTL MEVs refined models.* Both the CTL and HTL model  
1053 were analyzed by the RAMPAGE analysis tool after refinement. The refined CTL  
1054 MEV model was found to have 85.8% residues in favored region, 11.3% residues  
1055 in allowed region, and only 3.0% residues in the outlier region; while the refined  
1056 HTL MEV model was found to have 88.9% of residues in favored region, 8.9%  
1057 residues in allowed region, and only 2.2% residues in the outlier region (Fig.8)

1058

1059 *Linear and Discontinuous B-cell epitope prediction from MEVs.* The linear and  
1060 discontinuous B-cell epitope prediction was performed to enlist potential linear  
1061 and discontinuous epitopes from the refined 3D models of CTL and HTL MEVs  
1062 utilizing the ElliPro tool available on IEDB server. The screening revealed that the  
1063 CTL MEV carries 17 linear and 2 potential discontinuous B cell epitopes and that



1064 of HTL MEV carries 17 linear and 4 potential discontinuous epitopes. The high  
1065 range of the PI (Protrusion Index) score of the linear and discontinuous epitopes  
1066 from CTL and HTL MEVs show a high potential of the epitopes to cause humoral  
1067 immune response (PI score: CTL MEV linear & discontinuous B cell epitopes -  
1068 0.511 to 0.828 & 0.664 to 0.767 respectively; HTL MEV linear and discontinuous  
1069 B cell epitopes - 0.518 to 0.831 & 0.53 to 0.776 respectively) (Supplementary  
1070 table S4,S5, S6, S7).

1071

1072 ***Molecular interaction analysis of MEVs with immunological receptor.***

1073 *Molecular docking study of MEVs and TLR-3.* Both the refined models of CTL  
1074 and HTL MEVs were further studied for their molecular interaction with the  
1075 ectodomain (ECD) of human TLR-3. Therefore, molecular docking of CTL and  
1076 HTL MEVs model with the TLR-3 crystal structure model (PDB ID: 2A0Z) was  
1077 performed utilizing the PatchDock tool. Generated docking conformation with the  
1078 highest scores of 20776 and 20350 for CTL and HTL MEVs respectively were  
1079 chosen for further study. The highest docking score indicates the best geometric  
1080 shape complementarity fitting conformation of MEVs and the TLR-3 receptor as  
1081 predicted by the PatchDock tool. Both the CTL and HTL MEVs were fitting into  
1082 the ectodomain region of TLR-3 after docking (Fig.9A, 9C). The CTL and HTL  
1083 MEVs have shown to form multiple hydrogen bonds within the ectodomain cavity  
1084 region of TLR-3.

1085 The B-factor analysis of MEVs-TLR3 complexes was also performed. The  
1086 B-factor indicates the displacement of the atomic positions from an average

1087 (mean) value i.e. the more flexible an atom is the larger the displacement from  
1088 the mean position will be (mean-squares displacement) (Fig.9B, 9D). The B-  
1089 factor analysis of the CTL and HTL MEVs bound to the TLR3 receptor shows that  
1090 most of the regions of MEVs bound to TLR3 are stable nature in nature. The B-  
1091 Factor analysis has been represented by the VIBGYOR color presentation with  
1092 blue represents low B-factor and red represents high B-factor. Hence, the results  
1093 suggest a stable complex formation tendency for both the CTL and HTL MEVs  
1094 with the ectodomain of the human TLR-3 receptor (Fig.9B, 9D).

1095

1096

1097

1098

1099

1100

1101

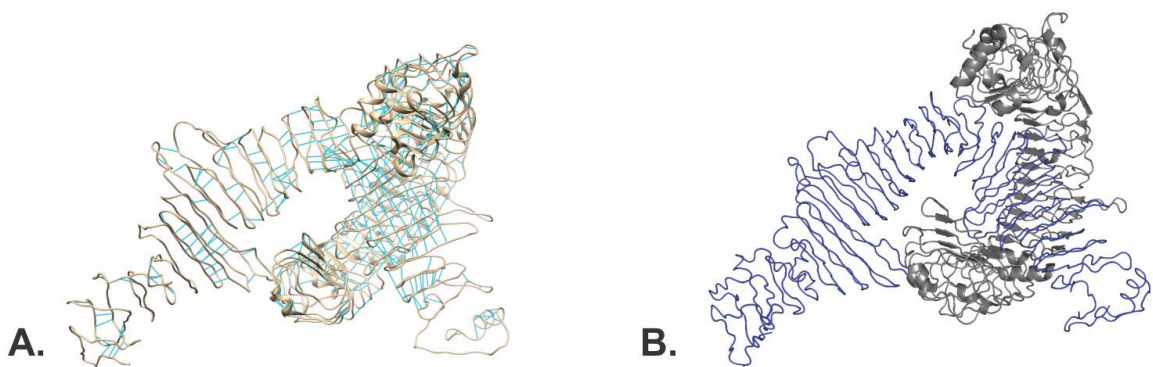

1102

**CTL Multi-epitope vaccine model in complex with TLR3**

1103

1104

1105

1106

1107

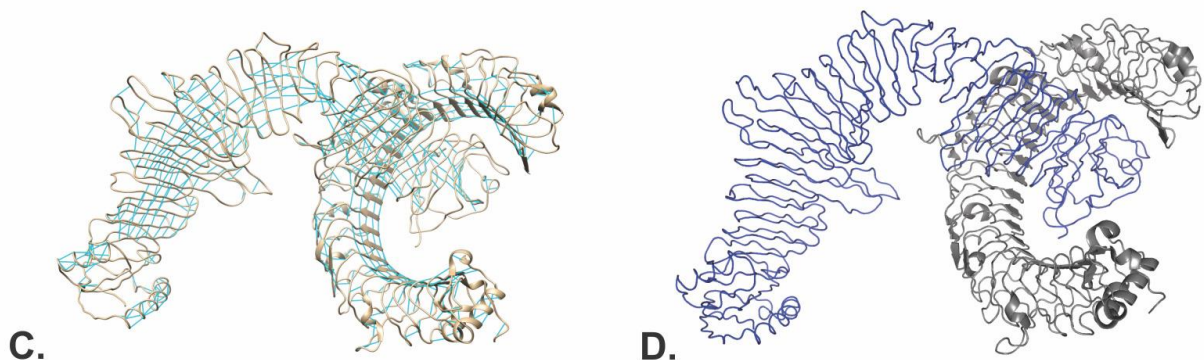

1108

**HTL Multi-epitope vaccine model in complex with TLR3**

1109

1110 **Figure 9. Molecular Docking study of CTL and HTL MEVs with TLR-3**  
1111 **receptor. (A), (C)** The docking complex of CTL-TLR and HTL-TLR3 have been  
1112 shown. The TLR3 is shown in the cartoon, and the MEVs are shown in the  
1113 ribbon. Hydrogen bond formation is shown by cyan lines. **(B), (D)** B-factor  
1114 presentation for the docked MEVs to the TLR3 receptor. The presentation is in  
1115 VIBGYOR color, with blue showing low B-factor and red show high B-factor. Here  
1116 most of the MEV regions are in blue showing low B-factor and hence indicate  
1117 stable complex formation with TLR3 receptor. Images were generated by PyMol  
1118 and UCSF Chimera (Pettersen et al., 2004).

1119

1120 *Molecular Dynamics (MD) Simulations study of MEVs and TLR-3 complex.* Both  
1121 the complexes of CTL MEV – TLR3 and the HTL MEV – TLR3 were further  
1122 subjected for molecular dynamics simulation analysis to investigate the stability  
1123 of the molecular interaction involved. Both the MEVs-TLR3 complexes have  
1124 shown a very convincing and reasonably stable root mean square deviation  
1125 (RMSD) values for C $\alpha$  , Back bone, and all atom (CTL-MEV-TLR3 Complex: ~4  
1126 to ~7.5 Å; HTL-MEV-TLR3 Complex: ~ 3.0 to ~9.8 Å) which stabilizing towards  
1127 the end, Fig 10. A & C. The RMSD of both complexes was maintained to the  
1128 above mentioned RMSD range for a given time window of 10 ns at reasonably  
1129 invariable temperature (~278 K) and pressure (~1 atm). Molecular docking and  
1130 molecular dynamics simulation study of all the MEVs-TLRs complexes indicate a  
1131 stable complex formation tendency. All most all the amino acid residues of the  
1132 CTL and HTL MEVs in complexed with TLR3 have shown to have root mean

1133 square fluctuation (RMSF) in acceptable range (~2 to ~6 Å), Fig. 10 B & D.

1134 These results indicate both the CTL MEV – TLR3 and HTL MEV – TLR3

1135 complexes to have a stable nature with acceptable molecular interaction

1136 tendency.

1137

1138

1139

1140

1141

1142

1143

1144

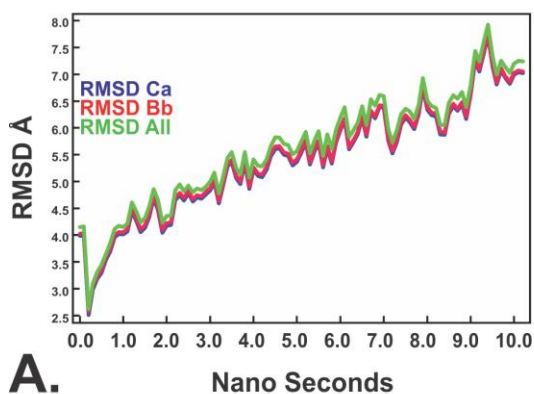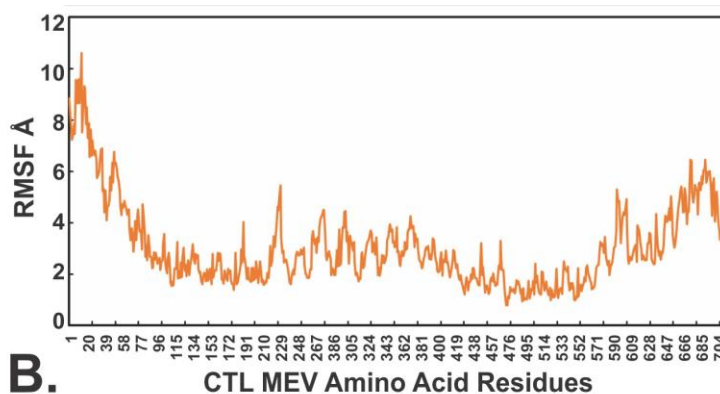

1145

**A. CTL Multi-epitope COVID19 vaccine - Toll Like Receptor 3 complex**

1146

1147

1148

1149

1150

1151

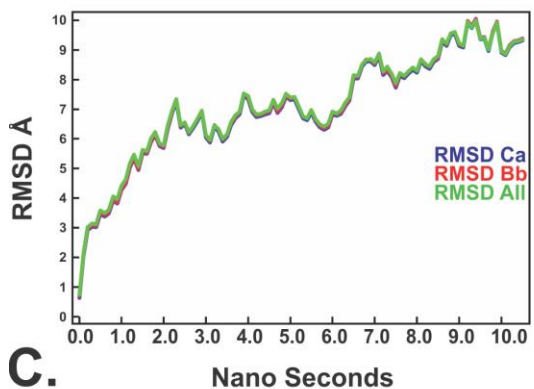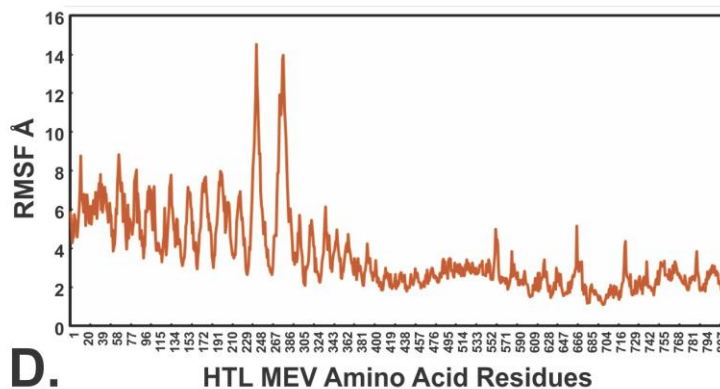

1152

**C. HTL Multi-epitope COVID19 vaccine - Toll Like Receptor 3 complex**

1153

1154

1155

1156 **Figure 10. Molecular Dynamics simulation of CTL and HTL MEVs with TLR-**  
1157 **3 receptor. (A), (C):** Root Mean Square Deviation (RMSD) for C $\alpha$ , Back bone  
1158 and all atoms (RMSD Ca, RMSD Bb, & RMSD All) respectively for The CTL  
1159 MEV – TLR3 complex and The HTL MEV – TLR3 complex. , docking complex of  
1160 CTL-TLR and HTL-TLR3 have been shown. **(B), (D):** Root Mean Square  
1161 Fluctuation (RMSF) for all the amino acid residues of CTL MEV and the HTL  
1162 MEV in complex with TLR3 immune receptor.

1163

#### 1164 ***In-silico* analysis of MEVs for cloning and expression potency**

1165 *Analysis of cDNA of both the MEVs for cloning and expression in the mammalian*  
1166 *host cell line.* Complementary DNA optimized for CTL and HTL expression in the  
1167 mammalian host cell line (Human) was generated by utilizing the Java Codon  
1168 Adaptation Tool. Further, the generated optimized cDNA's for both the MEVs  
1169 were analyzed by utilizing the GenScript Rare Codon Analysis Tool. The analysis  
1170 revealed that the codon-optimized cDNA of both the CTL and HTL MEVs bear all  
1171 the crucial and favorable compositions for high- level expression in a mammalian  
1172 cell line (CTL-MEV: GC content 70.40%, CAI (Codon Adaptation Index) score  
1173 1.00 and 0% tandem rare codons; HTL MEV: GC content 69.26%, CAI score  
1174 1.00 and 0% tandem rare codons). Ideally, the GC content of a cDNA should be  
1175 30% to 70%, CAI score that indicates the possibility of cDNA expression in a  
1176 chosen expression system should be between 0.8-1.0, and the tandem rare  
1177 codon frequency that indicates the presence of low-frequency codons in cDNA  
1178 should be <30%. The tandem rare codons may hinder the proper expression of

1179 the cDNA or even interrupt the translational machinery of the chosen expression  
1180 system. Hence as per the GenScript Rare Codon analysis, the cDNA of both the  
1181 MEVs satisfies all the mentioned parameters and are predicted to have high  
1182 expression in the mammalian host cell line (Human).

1183

## 1184 **CONCLUSION**

1185 In the present study, we have designed and proposed two multi-epitope  
1186 vaccines derived from multiple CTL and HTL epitopes against SARS-CoV-2  
1187 (COVID19). The chosen CTL and HTL epitopes show significant sequence  
1188 overlap with screened linear B cell epitopes. The shortlisted CTL and HTL  
1189 epitopes were utilized to design CTL and HTL multi-epitope vaccine. Both the  
1190 generated CTL and HTL multi-epitope vaccine tertiary models have shown to  
1191 carry potential linear and discontinuous B cell epitopes as well as potential INF- $\gamma$   
1192 epitopes. Hence the designed MEVs are predicted to have the potential to elicit  
1193 humoral as well as cellular immune responses. Since *Onchocerca volvulus*  
1194 activation-associated secreted protein-1 (Ov-ASP-1) binds to the APCs and  
1195 trigger pro-inflammatory cytokine production via Toll-like receptor 3 (TLR3), the  
1196 truncated (residues 10-153) Ov-ASP-1 has been utilized as an adjuvant at N  
1197 terminal of both the CTL and HTL MEVs models. Chosen overlapping clustering  
1198 epitopes were validated for their molecular interaction with their respective HLA  
1199 allele binders by molecular docking studies. The molecular interaction of the  
1200 chosen CTL epitopes within the TAP transporter cavity was also analyzed.  
1201 Analysis of the average world population coverage by both the shortlisted CTL



1202 and HTL epitopes combined revealed coverage of 96.10% world population. The  
1203 molecular interaction analysis of both the CTL and HTL MEVs with the  
1204 immunoreceptor TLR3 has shown very convincing structural fitting of the MEVs  
1205 into the ectodomain of TLR3 receptor cavity. This result was further confirmed by  
1206 the molecular dynamics simulation studies of both the CTL MEV – TLR3 and  
1207 HTL MEV – TLR3 complexes, indicating stable molecular complex formation  
1208 tendency for both the MEVs in complex with TLR3. The cDNA for both the MEVs  
1209 was generated considering codon-biasing for expression in the mammalian host  
1210 cell line (Human). Both the cDNA has been optimized in respect of their GC  
1211 content and zero tandem rare codons for the cDNA to have high expression  
1212 possibility in the mammalian host cell line (Human). Hence for further studies,  
1213 both the design of CTL and HTL MEVs could be cloned, expressed and tested  
1214 for *in-vivo* validations and animal trials as potential vaccine candidates against  
1215 SARS-CoV-2 infection.

1216

1217 **Supplementary table S1. Homology modeling for HLA alleles.** Tertiary  
1218 structures of HLA alleles were modeled by homology modeling using SwissModel  
1219 server. Templates were chosen with the highest sequence identity. Generated  
1220 models with acceptable QMEAN values were chosen for further studies.

1221

1222 **Supplementary table S2. INF- $\gamma$  epitopes from CTL and HTL MEVs.** INF- $\gamma$   
1223 inducing (POSITIVE) epitopes from CTL and HTL MEVs were screened by using  
1224 “Motif and SVM hybrid” (MERC1 & SVM) approach.

1225

1226 **Supplementary table S3. Refinement models of CTL and HTL MEVs.** Both  
1227 the CTL and HTL MEVs models were refined by GalaxyWEB server. After  
1228 refinement, in particular the Rama favored residues increased significantly.

1229

1230 **Supplementary table S4. B Cell linear epitopes of CTL MEVs.** Linear B Cell  
1231 epitopes predicted by ElliPro (IEDB) from CTL MEVs.

1232

1233 **Supplementary table S5. B Cell discontinuous epitopes of CTL MEVs.**  
1234 Discontinuous B Cell epitopes predicted by ElliPro (IEDB) from CTL MEVs.

1235  
1236 **Supplementary table S6. B Cell linear epitopes of HTL MEVs.** Linear B Cell  
1237 epitopes predicted by ElliPro (IEDB) from HTL MEVs.

1238  
1239 **Supplementary table S7. B Cell discontinuous epitopes of HTL MEVs.**  
1240 Discontinuous B Cell epitopes predicted by ElliPro (IEDB) from HTL MEVs.

1241  
1242 **Supplementary table S8. Shortlisted high scoring CTL epitopes (MHC-I**  
1243 **Binding Predictions).** Selected high scoring CTL epitopes and their respective  
1244 HLA alleles binders predicted by “MHC-I Binding Predictions” IEDB tool. *In-silico*  
1245 analysis has shown all the selected epitopes to be non-toxic (Non-Toxin) as well  
1246 as they show significant conservancy and high immunogenicity.

1247  
1248 **Supplementary table S9. Shortlisted high scoring CTL epitopes (MHC-I**  
1249 **Processing Predictions).** Selected high scoring CTL epitopes and their  
1250 respective HLA alleles binders predicted by “MHC-I Processing Predictions”  
1251 IEDB tool. The screening gives detailed and combined scoring “Total score” for  
1252 Proteasomal cleavage/TAP transport/MHC class I combined. *In-silico* analysis  
1253 have shown all the selected epitopes to be non-toxic (Non-Toxin) as well as they  
1254 show significant conservancy with high immunogenicity.

1255  
1256 **Supplementary table S10. Shortlisted high scoring HTL epitopes (MHC-II**  
1257 **Binding Predictions).** Selected high “Percentile rank” HTL epitopes with their  
1258 respective HLA class II alleles binders predicted by the “MHC-II Binding  
1259 Predictions” tool of IEDB are listed. *In-silico* analysis has shown all the selected  
1260 epitopes to be non-toxic (Non-Toxin) as well as they show significant  
1261 conservancy.

1262  
1263 **Supplementary table S11. Shortlisted B Cell epitopes (BepiPred Linear B**  
1264 **Cell Prediction).** B cell linear epitopes with length of 4 to 20 amino acids,  
1265 predicted by the “BepiPred Linear B Cell Prediction” IEDB tool, from eleven  
1266 SARS-CoV-2 proteins, are listed here. *In-silico* analysis has shown all the  
1267 selected epitopes to be non-toxic (Non-Toxin) as well as they show significant  
1268 amino acid sequence conservancy.

1269

## 1270 **AUTHOR CONTRIBUTION:**

1271 Protocol design: S.S., M.K.; Methodology performed by S.S., S.V., M.K., R.K.;

1272 Global Economic risk analysis: R.K.B.; Data analysis, scientific writing and



1273 revising the article: S.S., S.V., M.K., R.K., R.K.B., A.K.S., H.J.S., M.Kolbe, KCP.

1274

1275 **ADDITIONAL INFORMATION:**

1276 Authors declare to have no competing interests.

1277

1278 **REFERENCES:**

1279 Abele, R. and Tampé, R., 2004. The ABCs of immunology: structure and function  
1280 of TAP, the transporter associated with antigen processing. *Physiology*,  
1281 19(4), pp.216-224.

1282 Antoniou, A.N., Powis, S.J. and Elliott, T., 2003. Assembly and export of MHC  
1283 class I peptide ligands. *Current opinion in immunology*, 15(1), pp.75-81.

1284 Arnold K, Bordoli L, Kopp J, and Schwede T (2006). The SWISS-MODEL  
1285 Workspace: A web-based environment for protein structure homology  
1286 modelling. *Bioinformatics.*,22,195-201.

1287 Bell, J.K., Botos, I., Hall, P.R., Askins, J., Shiloach, J., Segal, D.M. and Davies,  
1288 D.R., 2005. The molecular structure of the Toll-like receptor 3 ligand-  
1289 binding domain. *Proceedings of the National Academy of Sciences of the*  
1290 *United States of America*, 102(31), pp.10976-10980.

1291 Benkert, P., Tosatto, S.C. and Schomburg, D., 2008. QMEAN: A comprehensive  
1292 scoring function for model quality assessment. *Proteins: Structure,*  
1293 *Function, and Bioinformatics*, 71(1), pp.261-277.

1294 Bui H. H, Sidney J, Dinh K, Southwood S, Newman M. J, Sette A. 2006.  
1295 Predicting population coverage of T-cell epitope-based diagnostics and  
1296 vaccines. *BMC Bioinformatics* 17:153.

1297 Bui HH, Sidney J, Li W, Fusseder N, Sette A. 2007. Development of an epitope  
1298 conservancy analysis tool to facilitate the design of epitope-based  
1299 diagnostics and vaccines. *BMC Bioinformatics* 8:361.

1300 Calis JJA, Maybeno M, Greenbaum JA, Weiskopf D, De Silva AD, Sette A,  
1301 Kesmir C, Peters B. 2013. Properties of MHC class I presented peptides  
1302 that enhance immunogenicity. *PloS Comp. Biol.* 8(1):361.

1303 Case, D.A., Babin, V., Berryman, J.T., Betz, R.M., Cai, Q., Cerutti, D.S.,  
1304 Cheatham III, T.E., Darden, T.A., Duke, R.E., Gohlke, H. and Goetz, A.W.,  
1305 2014. The FF14SB force field. *Amber*, 14, pp.29-31.

1306 Chen, X., Zaro, J.L. and Shen, W.C., 2013. Fusion protein linkers: property,

- 1307 design and functionality. *Advanced drug delivery reviews*, 65(10),  
1308 pp.1357-1369.
- 1309 Delneste, Y., Beauvillain, C. and Jeannin, P., 2007. Innate immunity: structure  
1310 and function of TLRs. *Medecine sciences: M/S*, 23(1), pp.67-73.
- 1311 Dhanda, S. K., Vir, P. & Raghava, G. P. Designing of interferon-gamma inducing  
1312 MHC class-II binders. *Biol. Direct.* 8, 30 (2013).
- 1313 Dong Xu and Yang Zhang. Improving the Physical Realism and Structural  
1314 Accuracy of Protein Models by a Two-step Atomic-level Energy  
1315 Minimization. *Biophysical Journal*, vol 101, 2525-2534 (2011).
- 1316 Duhovny D, Nussinov R, Wolfson HJ. Efficient Unbound Docking of Rigid  
1317 Molecules. In Gusfield et al., Ed. *Proceedings of the 2'nd Workshop on  
1318 Algorithms in Bioinformatics(WABI) Rome, Italy, Lecture Notes in  
1319 Computer Science 2452*, pp. 185-200, Springer Verlag, 2002
- 1320 Farina, C., Krumbholz, M., Giese, T., Hartmann, G., Aloisi, F. and Meinl, E.,  
1321 2005. Preferential expression and function of Toll-like receptor 3 in human  
1322 astrocytes. *Journal of neuroimmunology*, 159(1-2), pp.12-19.
- 1323 Gasteiger, E., Hoogland, C., Gattiker, A., Duvaud, S.E., Wilkins, M.R., Appel,  
1324 R.D. and Bairoch, A., 2005. Protein identification and analysis tools on the  
1325 ExPASy server (pp. 571-607). Humana Press.
- 1326 Grifoni, A., Sidney, J., Zhang, Y., Scheuermann, R.H., Peters, B. and Sette, A.,  
1327 2020. A Sequence Homology and Bioinformatic Approach Can Predict  
1328 Candidate Targets for Immune Responses to SARS-CoV-2. *Cell Host &  
1329 Microbe*.
- 1330 Guo, J., Yang, Y., Xiao, W., Sun, W., Yu, H., Du, L., Lustigman, S., Jiang, S.,  
1331 Kou, Z. and Zhou, Y., 2015. A truncated fragment of Ov-ASP-1 consisting  
1332 of the core pathogenesis-related-1 (PR-1) domain maintains adjuvanticity  
1333 as the full-length protein. *Vaccine*, 33(16), pp.1974-1980.
- 1334 Gupta, S., Kapoor, P., Chaudhary, K., Gautam, A., Kumar, R., Raghava, G.P.  
1335 and Open Source Drug Discovery Consortium, 2013. In silico approach for  
1336 predicting toxicity of peptides and proteins. *PLoS One*, 8(9), p.e73957.
- 1337 Hajjigharamani, N., Nezafat, N., Eslami, M., Negahdaripour, M., Rahmatabadi,  
1338 S.S. and Ghasemi, Y., 2017. Immunoinformatics analysis and in silico  
1339 designing of a novel multi-epitope peptide vaccine against *Staphylococcus  
1340 aureus*. *Infection, Genetics and Evolution*, 48, pp.83-94.
- 1341 He, Y., Barker, S.J., MacDonald, A.J., Yu, Y., Cao, L., Li, J., Parhar, R., Heck, S.,  
1342 Hartmann, S., Golenbock, D.T. and Jiang, S., 2009. Recombinant Ov-  
1343 ASP-1, a Th1-biased protein adjuvant derived from the helminth  
1344 *Onchocerca volvulus*, can directly bind and activate antigen-presenting  
1345 cells. *The Journal of Immunology*, 182(7), pp.4005-4016.
- 1346 Hoof, I., Peters, B., Sidney, J., Pedersen, L.E., Sette, A., Lund, O., Buus, S. and

- 1347 Nielsen, M., 2009. NetMHCpan, a method for MHC class I binding  
1348 prediction beyond humans. *Immunogenetics*, 61(1), p.1.
- 1349 Hu W, Li F, Yang X, Li Z, Xia H, Li G, Wang Y, Zhang Z. A flexible peptide linker  
1350 enhances the immunoreactivity of two copies HBsAg preS1 (21-47) fusion  
1351 protein. *J Biotechnol.* 2004;107:83–90.
- 1352 Irini A Doytchinova and Darren R Flower. VaxiJen: a server for prediction of  
1353 protective antigens, tumour antigens and subunit vaccines. *BMC*  
1354 *Bioinformatics.* 2007 8:4.
- 1355 Ko, J., Park, H., Heo, L., and Seok, C., GalaxyWEB server for protein structure  
1356 prediction and refinement, *Nucleic Acids Res.* 40 (W1), W294-W297  
1357 (2012).
- 1358 Krieger, E. and Vriend, G., 2015. New ways to boost molecular dynamics  
1359 simulations. *Journal of computational chemistry*, 36(13), pp.996-1007.
- 1360 Kringelum, J.V., Lundegaard, C., Lund, O. and Nielsen, M., 2012. Reliable B cell  
1361 epitope predictions: impacts of method development and improved  
1362 benchmarking. *PLoS computational biology*, 8(12).
- 1363 Larsen JE, Lund O, Nielsen M. 2006. Improved method for predicting linear B-  
1364 cell epitopes. *Immunome Res* 2:2.
- 1365 MacDonald, A.J., Cao, L., He, Y., Zhao, Q., Jiang, S. and Lustigman, S., 2005.  
1366 rOv-ASP-1, a recombinant secreted protein of the helminth *Onchocerca*  
1367 *volvulus*, is a potent adjuvant for inducing antibodies to ovalbumin, HIV-1  
1368 polypeptide and SARS-CoV peptide antigens. *Vaccine*, 23(26), pp.3446-  
1369 3452.
- 1370 Maier, J.A., Martinez, C., Kasavajhala, K., Wickstrom, L., Hauser, K.E. and  
1371 Simmerling, C., 2015. ff14SB: improving the accuracy of protein side chain  
1372 and backbone parameters from ff99SB. *Journal of chemical theory and*  
1373 *computation*, 11(8), pp.3696-3713.
- 1374 Morla, S., Makhija, A. & Kumar, S. Synonymous codon usage pattern in  
1375 glycoprotein gene of rabies virus. *Gene.* 584, 1–6 (2016).
- 1376 Nagpal, G., Gupta, S., Chaudhary, K., Dhanda, S.K., Prakash, S. and Raghava,  
1377 G.P., 2015. VaccineDA: Prediction, design and genome-wide screening of  
1378 oligodeoxynucleotide-based vaccine adjuvants. *Scientific reports*, 5,  
1379 p.12478.
- 1380 NCBI protein sequence database: SARS-CoV-2 (Severe acute respiratory  
1381 syndrome coronavirus 2) Sequences  
1382 (<https://www.ncbi.nlm.nih.gov/genbank/sars-cov-2-seqs/>)
- 1383 Nielsen, M., Lundegaard, C. and Lund, O., 2007. Prediction of MHC class II  
1384 binding affinity using SMM-align, a novel stabilization matrix alignment  
1385 method. *BMC bioinformatics*, 8(1), p.238.
- 1386 Oldham, M.L., Grigorieff, N. and Chen, J., 2016. Structure of the Transporter

- 1387 associated with antigen processing trapped by herpes simplex virus. *eLife*,  
1388 5, p.e21829.
- 1389 Peters B, Bulik S, Tampe R, Van Endert PM, Holzhutter HG. 2003. Identifying  
1390 MHC class I epitopes by predicting the TAP transport efficiency of epitope  
1391 precursors. *J Immunol*171:1741-1749.
- 1392 Pettersen, E.F., Goddard, T.D., Huang, C.C., Couch, G.S., Greenblatt, D.M.,  
1393 Meng, E.C. and Ferrin, T.E., 2004. UCSF Chimera—a visualization  
1394 system for exploratory research and analysis. *Journal of computational  
1395 chemistry*, 25(13), pp.1605-1612.
- 1396 Ponomarenko JV, Bui H, Li W, Fusseder N, Bourne PE, Sette A, Peters B. 2008.  
1397 ElliPro: a new structure-based tool for the prediction of antibody epitopes.  
1398 *BMC Bioinformatics* 9:514.
- 1399 PyMOL: The PyMOL Molecular Graphics System, Version 2.0 Schrödinger, LLC.
- 1400 Ramakrishnan, C. and Ramachandran, G.N., 1965. Stereochemical criteria for  
1401 polypeptide and protein chain conformations: II. Allowed conformations for  
1402 a pair of peptide units. *Biophysical journal*, 5(6), pp.909-933.
- 1403 Roy, A., Kucukural, A. and Zhang, Y., 2010. I-TASSER: a unified platform for  
1404 automated protein structure and function prediction. *Nature protocols*,  
1405 5(4), p.725.
- 1406 S.C. Lovell, I.W. Davis, W.B. Arendall III, P.I.W. de Bakker, J.M. Word, M.G.  
1407 Prisant, J.S. Richardson and D.C. Richardson (2002) Structure validation  
1408 by Calpha geometry: phi,psi and Cbeta deviation. *Proteins: Structure,  
1409 Function & Genetics*. 50: 437-450.
- 1410 Saha, S. & Raghava, G. AlgPred: prediction of allergenic proteins and mapping  
1411 of IgE epitopes. *Nucleic. Acids. Res.* 34, W202–W209 (2006).
- 1412 Schneidman-Duhovny D, Inbar Y, Nussinov R, Wolfson HJ. PatchDock and  
1413 SymmDock: servers for rigid and symmetric docking. *Nucl. Acids. Res.* 33:  
1414 W363-367, 2005.
- 1415 Shen, Y., Maupetit, J., Derreumaux, P. and Tufféry, P., 2014. Improved PEP-  
1416 FOLD approach for peptide and miniprotein structure prediction. *Journal of  
1417 chemical theory and computation*, 10(10), pp.4745-4758.
- 1418 Shin, W.H., Lee, G.R., Heo, L., Lee, H. and Seok, C., 2014. Prediction of protein  
1419 structure and interaction by GALAXY protein modeling programs. *Bio  
1420 Design*, 2(1), pp.1-11.
- 1421 Sidney, J., Assarsson, E., Moore, C., Ngo, S., Pinilla, C., Sette, A. and Peters,  
1422 B., 2008. Quantitative peptide binding motifs for 19 human and mouse  
1423 MHC class I molecules derived using positional scanning combinatorial  
1424 peptide libraries. *Immunome research*, 4(1), p.2.
- 1425 Sievers, F., Wilm, A., Dineen, D., Gibson, T.J., Karplus, K., Li, W., Lopez, R.,  
1426 McWilliam, H., Remmert, M., Söding, J. and Thompson, J.D., and Higgins

- 1427 D.G., 2011. Fast, scalable generation of high-quality protein multiple  
1428 sequence alignments using Clustal Omega. *Molecular systems biology*,  
1429 7(1), p.539.
- 1430 Srivastava, S., Kamthania, M., Kumar Pandey, R., Kumar Saxena, A., Saxena,  
1431 V., Kumar Singh, S., Kumar Sharma, R. and Sharma, N., 2019. Design of  
1432 novel multi-epitope vaccines against severe acute respiratory syndrome  
1433 validated through multistage molecular interaction and dynamics. *Journal*  
1434 *of Biomolecular Structure and Dynamics*, 37(16), pp.4345-4360.
- 1435 Srivastava, S., Kamthania, M., Singh, S., Saxena, A.K. and Sharma, N., 2018.  
1436 Structural basis of development of multi-epitope vaccine against middle  
1437 east respiratory syndrome using in silico approach. *Infection and drug*  
1438 *resistance*, 11, p.2377.
- 1439 Sturniolo, T., Bono, E., Ding, J., Raddrizzani, L., Tuereci, O., Sahin, U.,  
1440 Braxenthaler, M., Gallazzi, F., Protti, M.P., Sinigaglia, F. and Hammer, J.,  
1441 1999. Generation of tissue-specific and promiscuous HLA ligand  
1442 databases using DNA microarrays and virtual HLA class II matrices.  
1443 *Nature biotechnology*, 17(6), p.555.
- 1444 Tenzer S, Peters B, Bulik S, Schoor O, Lemmel C, Schatz MM, Kloetzel PM,  
1445 Rammensee HG, Schild H, Holzhutter HG. 2005. Modeling the MHC class  
1446 I pathway by combining predictions of proteasomal cleavage, TAP  
1447 transport and MHC class I binding. *Cell Mol Life Sci* 62:1025-1037.
- 1448 Totura, A.L., Whitmore, A., Agnihothram, S., Schäfer, A., Katze, M.G., Heise,  
1449 M.T. and Baric, R.S., 2015. Toll-like receptor 3 signaling via TRIF  
1450 contributes to a protective innate immune response to severe acute  
1451 respiratory syndrome coronavirus infection. *MBio*, 6(3), pp.e00638-15.
- 1452 Toukmaji, A., Sagui, C., Board, J. and Darden, T., 2000. Efficient particle-mesh  
1453 Ewald based approach to fixed and induced dipolar interactions. *The*  
1454 *Journal of chemical physics*, 113(24), pp.10913-10927.
- 1455 United nations conference on trade and development report 9<sup>th</sup> March 2020  
1456 (<https://unctad.org/en/pages/PressRelease.aspx?OriginalVersionID=548>)
- 1457 Wang, P., Sidney, J., Kim, Y., Sette, A., Lund, O., Nielsen, M. and Peters, B.,  
1458 2010. Peptide binding predictions for HLA DR, DP and DQ molecules.  
1459 *BMC bioinformatics*, 11(1), p.568.
- 1460 Wang, Z. and Xu, J., 2013. Predicting protein contact map using evolutionary and  
1461 physical constraints by integer programming. *Bioinformatics*, 29(13),  
1462 pp.i266-i273.
- 1463 World Health Organization report, Coronavirus disease 2019 (COVID-19)  
1464 Situation Report – 61, 21<sup>st</sup> March 2020 ([https://www.who.int/docs/default-source/coronaviruse/situation-reports/20200321-sitrep-61-covid-19.pdf?sfvrsn=6aa18912\\_2](https://www.who.int/docs/default-source/coronaviruse/situation-reports/20200321-sitrep-61-covid-19.pdf?sfvrsn=6aa18912_2))  
1466

1467 Wu, X., Wu, S., Li, D., Zhang, J., Hou, L., Ma, J., Liu, W., Ren, D., Zhu, Y. and  
1468 He, F., 2010. Computational identification of rare codons of Escherichia  
1469 coli based on codon pairs preference. *Bmc Bioinformatics*, 11(1), p.61.  
1470



**Eleven SARS-CoV-2 proteins were chosen**  
*Protein sequences retrieved from NCBI*

**Screening of potential CTL, HTL and B Cell epitopes**

Screening of CTL epitope  
(IEDB "MHC-I Binding Predictions" and  
"MHC-I Processing Predictions")

Screening of HTL epitopes  
(IEDB "MHC-II Binding Predictions")

Screening of protein sequence based B Cell epitope  
(IEDB "B Cell Epitope Prediction Tools")

Population coverage by screened  
CTL and HTL epitopes (IEDB "Population Coverage")

**Characterization of screened potential epitopes**

Epitope conservation analysis  
(IEDB "Epitope Conservancy Analysis")

Epitope toxicity prediction  
(ToxinPred)

Overlapping residue analysis for  
CTL, HTL & B Cell epitopes (Clustal Omega)

bioRxiv preprint doi: <https://doi.org/10.1101/2020.04.01.019299>; this version posted April 16, 2020. The copyright holder for this preprint (which was not certified by peer review) is the author/funder. All rights reserved. No reuse allowed without permission.

**Molecular interaction study of selected  
overlapping CTL & HTL epitopes with HLA allele and TAP transporter**

3D structure modelling of HLA alleles  
and selected CTL & HTL epitopes (Swiss-model & PEP-FOLD2.0)

Molecular interaction analysis of selected  
overlapping Ctl and HTL epitopes with HLA allele  
(PatchDock Tool)

Molecular interaction analysis of selected  
CTL epitopes with TAP transporter  
(PatchDock Tool)

**Design and characterisation of  
CTL & HTL Multi-Epitope Vaccines**

Interferon gama inducing epitope  
prediction from designed MEVs ("IFNepitope")

MEVs allergenicity and  
antigenicity prediction (AlgPred & VaxiJen)

Physicochemical  
analysis of MEVs (ProtParam)

**3D structure modelling and refinement of CTL &  
HTL MEVs (I-TASSER, ModRefiner, GalaxyWEB)**

*In-silico* validation of refined CTL  
& HTL MEV models (RAMPAGE)

Discontinuous B-cell epitope prediction  
from CTL & HTL MEVs (IEDB "ElliPro")

**Molecular interaction analysis of  
CTL & HTL MEVs with TLR3**  
(PatchDock)

***In-silico* analysis of cDNA of CTL & HTL MEVs for  
cloning and expression in mammalian cell line (Human)**  
(Codon Usage Wrangler Tool & GenScript Rare Codon Analysis Tool)



# A. CTL epitopes

# B. HTL epitopes

## Ov-ASP-1 (truncated (10-153))

IVVAVTGYNCPPGGKLTALERKKIVGQNNKYRSDLINGKL  
KNRNGTYMPRGKNMLELTWDCCKLESSAQRWANQCIFG  
HSPRQQREGVGENVYAYWSSVSVEGLKKTAGTDAGKS  
WWSKLPKLYENNPSSNNMTWKVAGQGVLHFTQ

### Envelope protein

EAAAK  
LLFLAFVVFLLVTLA

EAAAK  
LLFLAFVVF

### Membrane protein

GGGGS  
VLLFLAFVVFLLVTL

GGGGS  
LTALRLCAY

GGGGS  
GLMWLSYFIASFRLF

GGGGS  
YFIASFRLFAR

GGGGS  
LMWLSYFIASFRLFA

GGGGS  
ATSRTLSYYK

GGGGS  
LSYYKLGASQRVAGD

GGGGS  
MEVTPSGTW

GGGGS  
AQFAPSASAFFGMSR

GGGGS  
KPRQKRTAT

GGGGS  
IAQFAPSASAFFGMS

GGGGS  
MGYINVFAF

GGGGS  
PQIAQFAPSASAFFG

GGGGS  
GYINVFAFPF

GGGGS  
AIIASFSAFV

HHHHHH  
SEMVMCGGSLY

GGGGS  
ESPFVMMSAPPAQYE

GGGGS  
FYWFFSNYLKR

GGGGS  
IILASFSAFVE

GGGGS  
ISNSWLMW

GGGGS  
QESPFVMMSAPPAQY

GGGGS  
ETISLAGSYK

GGGGS  
SPFVMMSAPPAQYEL

GGGGS  
QEILGTVSW

GGGGS  
LFLALITLATCEL

GGGGS  
STFNVPMEK

GGGGS  
LLFVTYSHLLLVA

GGGGS  
RMYIFFASFY

GGGGS  
FKVSIWNLDYIINLI

GGGGS  
LFLVAAIFYL

GGGGS  
KVSIWNLDYIINLII

GGGGS  
RYFRLTLGVY

GGGGS  
TFKSIWNLDYIINL

GGGGS  
FLNGSCGSV

GGGGS  
IILFLALITLATCEL

GGGGS  
CTDDNALAY

GGGGS  
ILFLALITLATCELY

GGGGS  
CTDDNALAYY

GGGGS  
CFLAFLLFLVLIMLI

GGGGS  
MYKGLPWNVVR

GGGGS  
LCFLAFLLFLVLIML

GGGGS  
SIINNTVYTK

GGGGS  
YLCFLAFLLFLVLIM

GGGGS  
LPNVAFELW

GGGGS  
CTQHQPYYVDDPCPI

GGGGS  
DEWSMATYY

GGGGS  
HQPYYVDDPCPIHFY

GGGGS  
YILFTRFFYV

GGGGS  
QPYVDDPCPIHFYS

GGGGS  
YIFFASFYYV

GGGGS  
INVFAFPFTIYSLLL

GGGGS  
YLYALVYFL

GGGGS  
YINVFAFPFTIYSL

GGGGS  
IPYNSVTSSI

GGGGS  
KTQSLIVNNTATNVV

GGGGS  
RTFKVSIW

GGGGS  
LLIVNNTATNVVIVKVC

GGGGS  
AEILLIIMRTF

GGGGS  
QSLIVNNTATNVVIVK

GGGGS  
RARSVSPK

GGGGS  
SLLIVNNTATNVVIVK

GGGGS  
QLRARSVSPK

GGGGS  
TQSLIVNNTATNVVI

GGGGS  
FLAFLLFLV

GGGGS

GGGGS  
HFYSKWYIR

GGGGS

GGGGS  
WTAGAAAYYV

HHHHHH

GGGGS  
FPNITNLCPF

### Surface protein

GGGGS  
NUNYLYRLFR

GGGGS  
NYLYRLFR

HHHHHH

bioRxiv preprint doi: <https://doi.org/10.1101/2020.04.01.019293>; this version posted April 16, 2020. The copyright holder for this preprint (which was not certified by peer review) is the author/funder. All rights reserved. No reuse allowed without permission.



# Overlapping T & B cell epitopes across proteome of SARS-CoV-2

|                      |                                                                                                                                                                                                                                                                                                                                                                                                                                                                                                                                                                                                                                                                              |
|----------------------|------------------------------------------------------------------------------------------------------------------------------------------------------------------------------------------------------------------------------------------------------------------------------------------------------------------------------------------------------------------------------------------------------------------------------------------------------------------------------------------------------------------------------------------------------------------------------------------------------------------------------------------------------------------------------|
| ORF1ab               | <p>-----YILFTRFFYV-----<br/>WFLAYILFTRFFYVL---<br/>----LAYILFTRFFYVLGL-<br/>--FLAYILFTRFFYVLG--<br/>-----AYILFTRFFYVLGLA</p> <p>-----YIFFASFYYV<br/>RMYIFFASFY--<br/>RMYIFFASFYYV</p> <p>-----IILASFSASTSAFVE<br/>AAILASFSASTSAFV-<br/>474-489 AAILASFSASTSAFVE</p> <p>1800-1816 ---SPFVMMMSAPPAQYEL<br/>QESPFVMMMSAPPAQY--<br/>-ESPFVMMMSAPPAQYE-<br/>QESPFVMMMSAPPAQYEL</p> <p>2327-2344</p> <p>-----CTDDNALAY-----<br/>-----CTDDNALAYY-----<br/>GTTQACTDDNALAYYNTTK<br/>4157-4176 GTTQACTDDNALAYYNTTK</p> <p>5016-5034 RAMPNMLRIMASLVL---<br/>-----PNMLRIMASLVLARK-<br/>-----NMLRIMASLVLARKH<br/>---MPNMLRIMASLVLAR--<br/>--AMPNMLRIMASLVLA--<br/>RAMPNMLRIMASLVLARKH</p> |
| Surface protein      | <p>-----LLIVNNATNVVIKVC<br/>----SLLIVNNATNVVIKV-<br/>---QSLIVNNATNVVIK--<br/>--TQSLIVNNATNVVI--<br/>KTQSLIVNNATNVV---<br/>KTQSLIVNNATNVVIKVC<br/>113-131</p> <p>250-267 -----WTAGAAAYYV<br/>TPGDSSSGWTA-----<br/>TPGDSSSGWTAGAAAYYV</p> <p>329-363 FPNITNLCPF-----<br/>FPNITNLCPFGEVFNATRFASVYAWNRKRISNCVA<br/>FPNITNLCPFGEVFNATRFASVYAWNRKRISNCVA</p> <p>-----NINYLYRFLR-----<br/>-----NYLYRFLR-----<br/>NLDKSVGGNYNYLYRFLRKS NLKPFERDISTEIQAGSTPCNGVEGFNCYFPLQSYGFQPTN<br/>440-501 NLDKSVGGNYNYLYRFLRKS NLKPFERDISTEIQAGSTPCNGVEGFNCYFPLQSYGFQPTN</p>                                                                                                                      |
| ORF3a                | <p>-----FVRATATIPIQASLP<br/>QGEIKDATPSDF-----<br/>17-42 QGEIKDATPSDFVVRATATIPIQASLP</p> <p>158-167 IPYNSVTSSI<br/>-PYNSVT--<br/>IPYNSVTSSI</p>                                                                                                                                                                                                                                                                                                                                                                                                                                                                                                                               |
| Envelope protein     | <p>-----LLFLAFVVF-----<br/>-LLFLAFVVFLLVTLA<br/>VLLFLAFVVFLLVTL-<br/>VLLFLAFVVFLLVTLA<br/>17-32</p>                                                                                                                                                                                                                                                                                                                                                                                                                                                                                                                                                                          |
| Membrane Protein     | <p>-----YFIASFRLFAR<br/>--LMWLSYFIASFRLF-<br/>GLMWLSYFIASFRLF--<br/>89-105 GLMWLSYFIASFRLFAR</p> <p>171-191 ATSRTLSTYYK-----<br/>-----LSYYKLGASQRVAGD-<br/>-----KLGASQRVAGDS<br/>ATSRTLSTYYKLGASQRVAGDS</p>                                                                                                                                                                                                                                                                                                                                                                                                                                                                  |
| ORF6                 | <p>AEILLIIMRTF-----<br/>-----RTFKVSIW-----<br/>-----KVSINWLDYIINLII<br/>-----FKVSINWLDYIINLI-<br/>-----TFKVSINWLDYIINL--<br/>12-37 AEILLIIMRTFKVSINWLDYIINLII</p>                                                                                                                                                                                                                                                                                                                                                                                                                                                                                                            |
| ORF7a                | <p>-----ILFLALITLATCELY-----<br/>IILFLALITLATCEL-----<br/>-----LYHYQECVR<br/>3-25 IILFLALITLATCELYHYQECVR</p> <p>71-96 -----RARSVSPK-----<br/>-----QLRARSVSPK-----<br/>VKHVYQLRARSVSPKLFIRQEEVQEL</p>                                                                                                                                                                                                                                                                                                                                                                                                                                                                        |
| ORF7b                | <p>-----FLAFLFLV-----<br/>---CFLAFLFLVLI<br/>-LCFLAFLFLVLI<br/>YLCFLAFLFLVLI<br/>10-26 YLCFLAFLFLVLI</p>                                                                                                                                                                                                                                                                                                                                                                                                                                                                                                                                                                     |
| ORF8                 | <p>-----HFYSKWYIR-----<br/>-----QPYVDDPCPIHFYS-----<br/>-----HQPYVDDPCPIHFY-----<br/>-----CTQHQPYYVDDPCPI-----<br/>QSQCTQHQPYYVDDPCPIHFYSKW-----<br/>-----RVGARKSAP<br/>23-56 QSQCTQHQPYYVDDPCPIHFYSKWYIRVARKSAP</p>                                                                                                                                                                                                                                                                                                                                                                                                                                                         |
| Nucleocapsid Protein | <p>-----KPRQKRTAT--<br/>RLNQLESKMSGKGGQQGQQTVTKKSAAEASKKPRQKRTATKA<br/>226-267</p> <p>302-319 -----AQFAPSASAFFGMSR<br/>-----IAQFAPSASAFFGMS-<br/>PQIAQFAPSASAFFG--<br/>PQIAQFAPSASAFFGMSR</p>                                                                                                                                                                                                                                                                                                                                                                                                                                                                                |
| ORF10                | <p>-----GYINVFAPF-----<br/>MGYINVFAP-----<br/>-----YINVFAPFTIYSL<br/>1-17 MGYINVFAPFTIYSL</p>                                                                                                                                                                                                                                                                                                                                                                                                                                                                                                                                                                                |

bioRxiv preprint doi: <https://doi.org/10.1101/2020.04.01.019299>; this version posted April 16, 2020. The copyright holder for this preprint (which was not certified by peer review) is the author/funder. All rights reserved. No reuse allowed without permission.



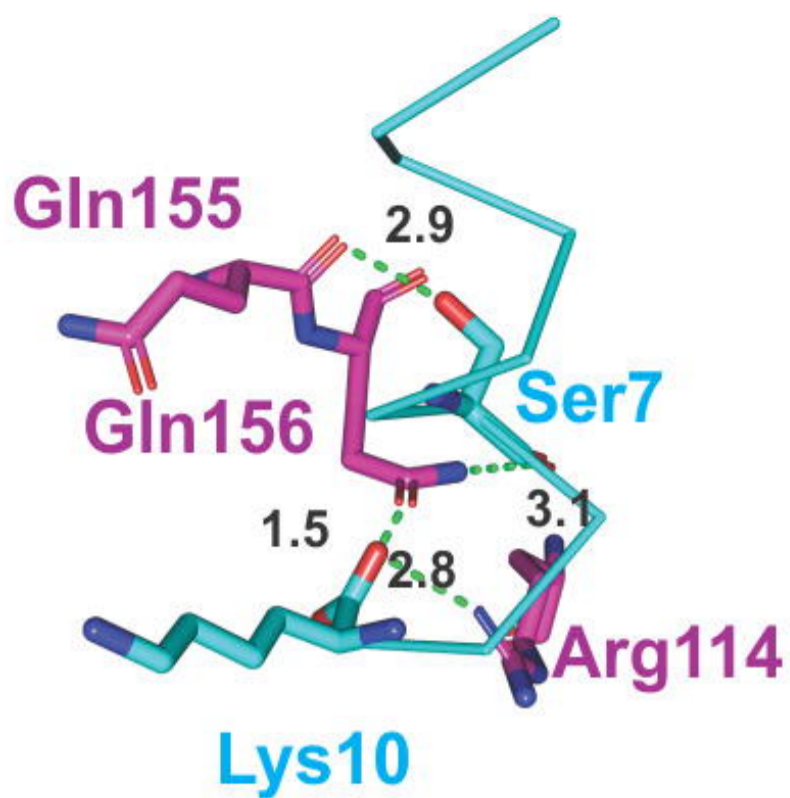

1. ATSRTL<sup>S</sup>YYK-HLA-A\*11:01

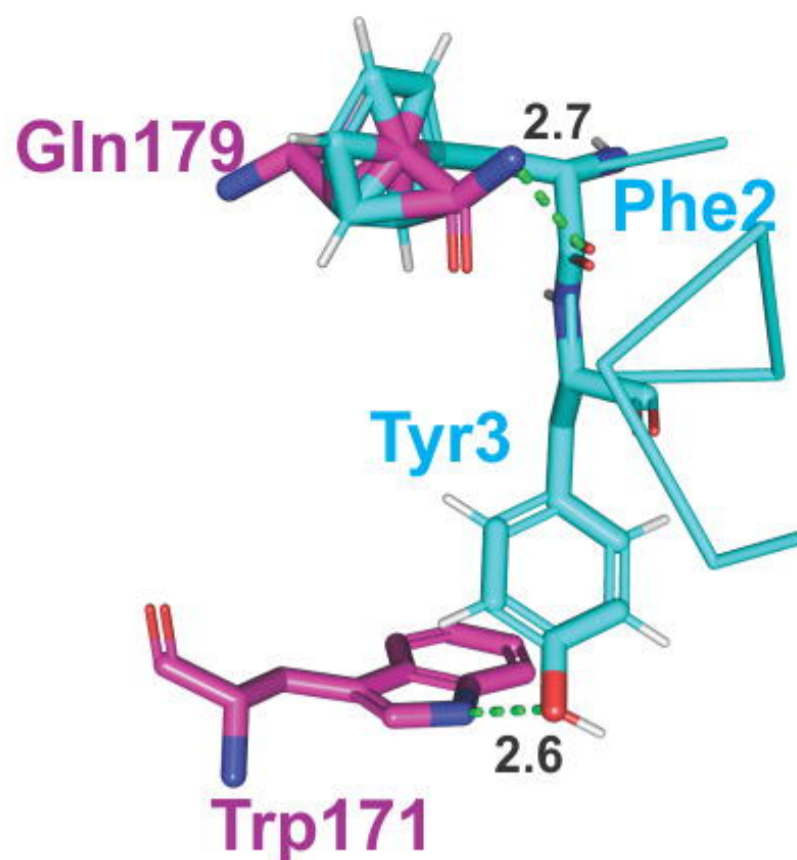

2. HFYSK<sup>W</sup>YIR-HLA-A\*31:01

## CTL epitopes - HLA Class I allele complexes

bioRxiv preprint doi: <https://doi.org/10.1101/2020.04.01.019299>; this version posted April 16, 2020. The copyright holder for this preprint (which was not certified by peer review) is the author/funder. All rights reserved. No reuse allowed without permission.

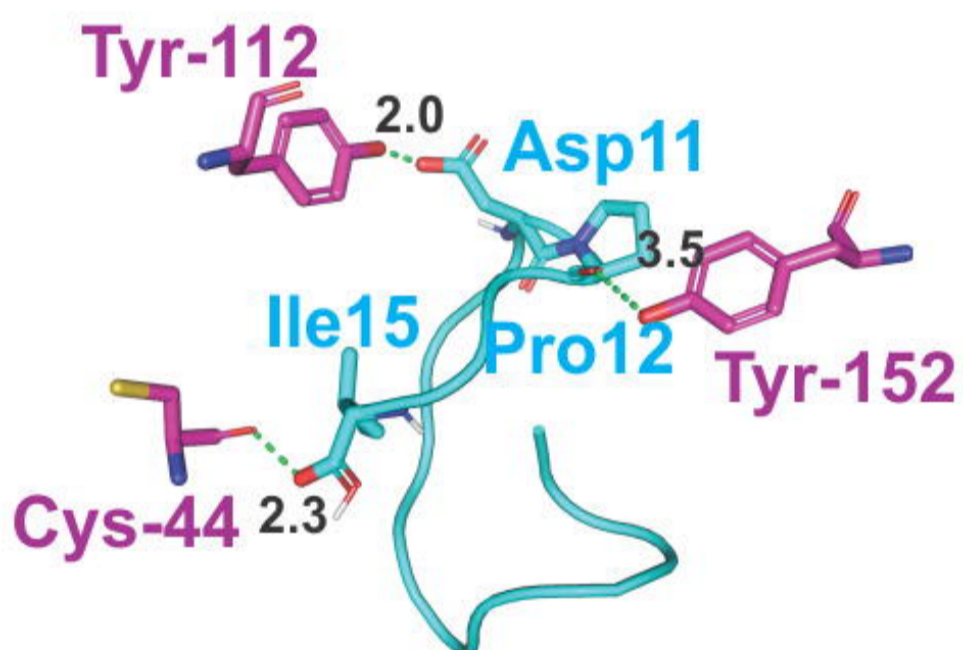

3. CTQHQP<sup>Y</sup>VVDDPCPI-HLA-DRB3\*01:01

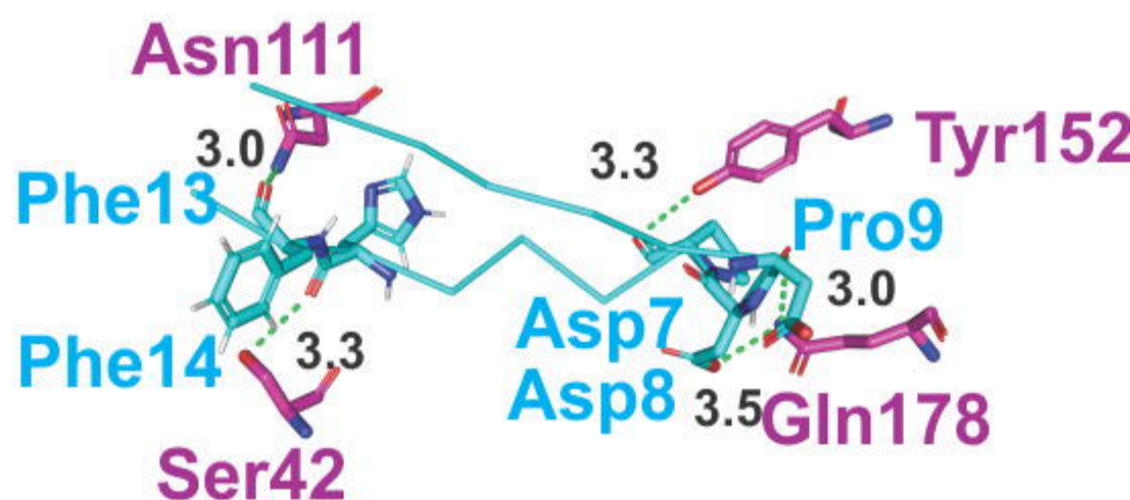

4. HQPYV<sup>V</sup>DDPCPIHFY-HLA-DRB3\*01:01

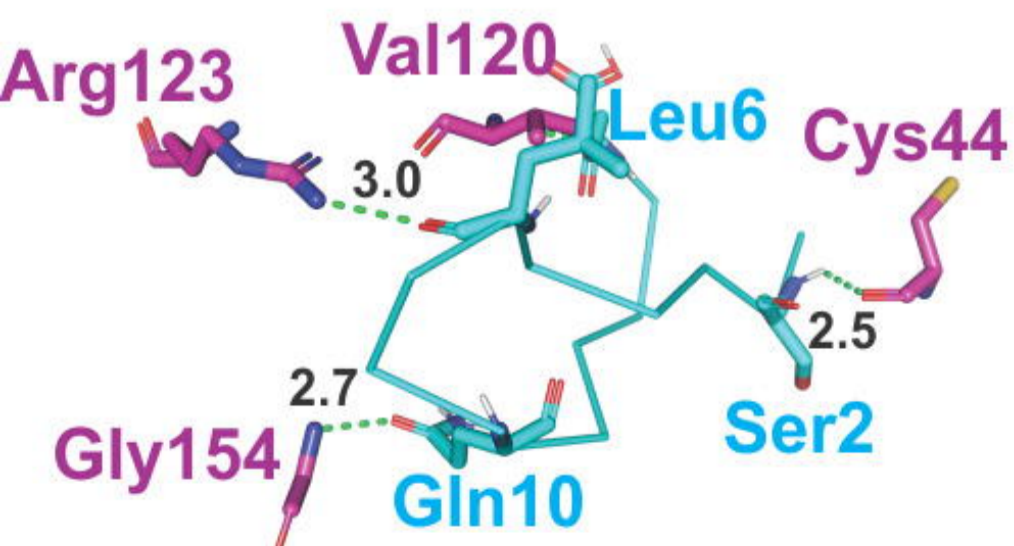

5. LSYYK<sup>L</sup>LGASQ<sup>R</sup>VAGD-HLA-DRB1\*09:01

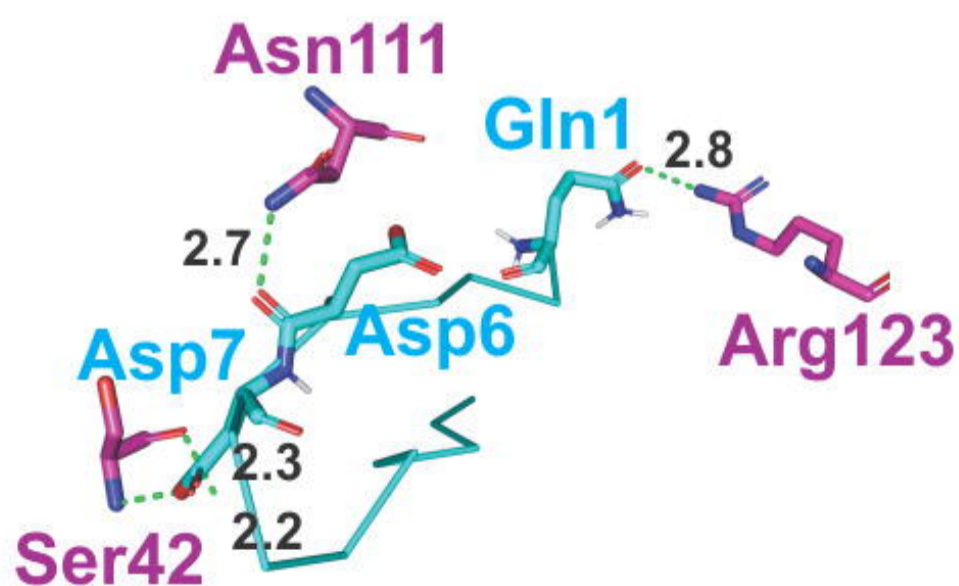

6. QPYV<sup>V</sup>DDPCPIHFYS-HLA-DRB3\*01:01

## HTL epitopes - HLA Class II allele complexes



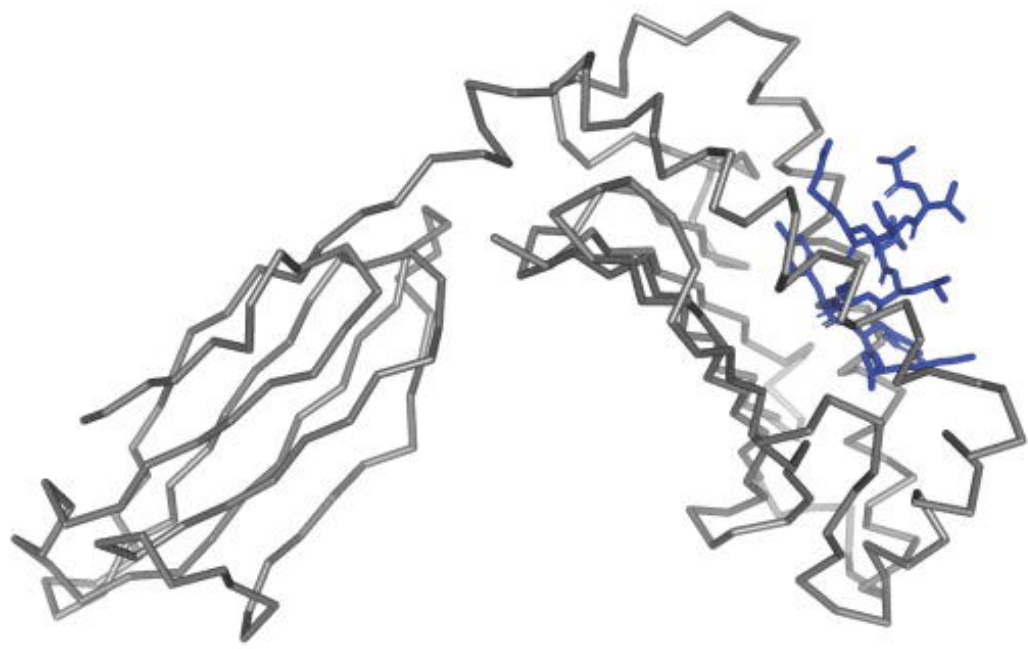

1. ATSRTLSYYK-HLA-A\*11:01

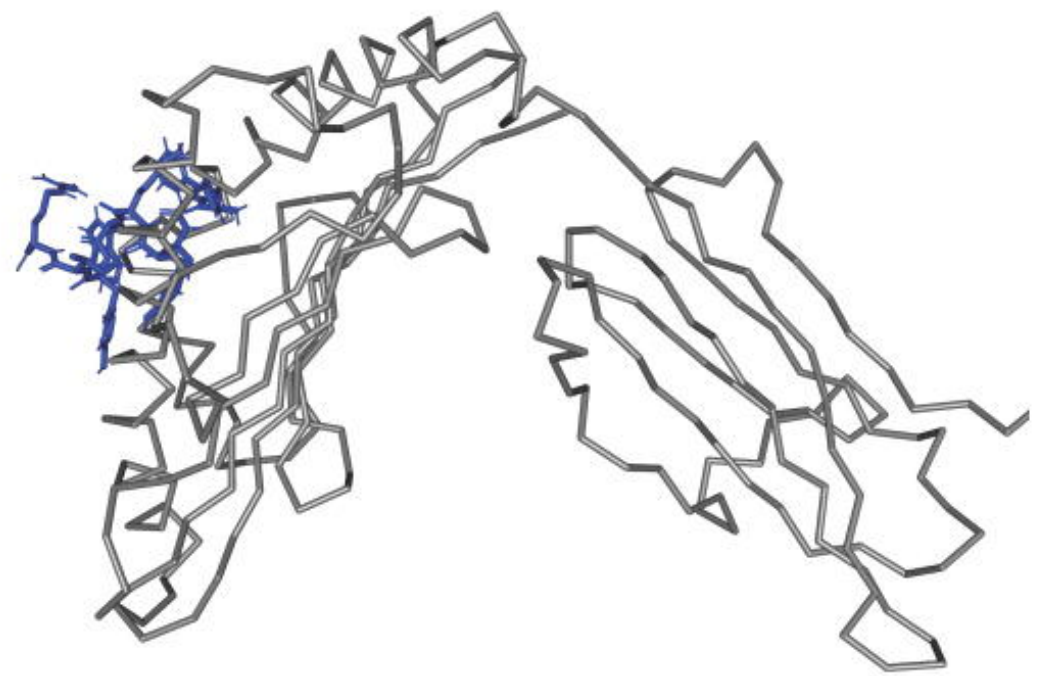

2. HFYSKWYIR-HLA-A\*31:01

bioRxiv preprint doi: <https://doi.org/10.1101/2020.04.01.019299>; this version posted April 16, 2020. The copyright holder for this preprint (which was not certified by peer review) is the author/funder. All rights reserved. No reuse allowed without permission.

## CTL epitopes - HLA Class I allele complexes

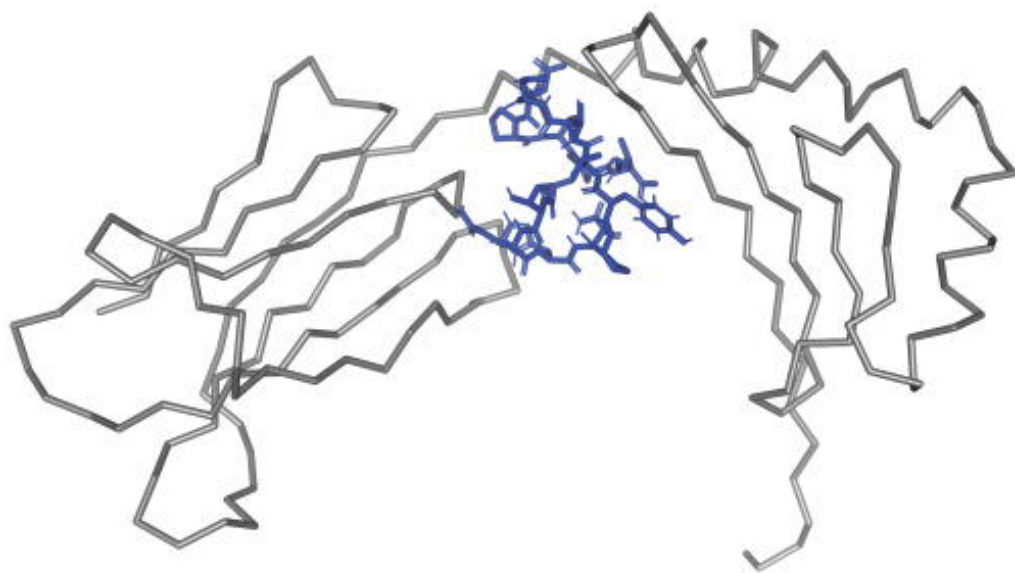

3. CTQHQPYYVDDPCPI-HLA-DRB3\*01:01

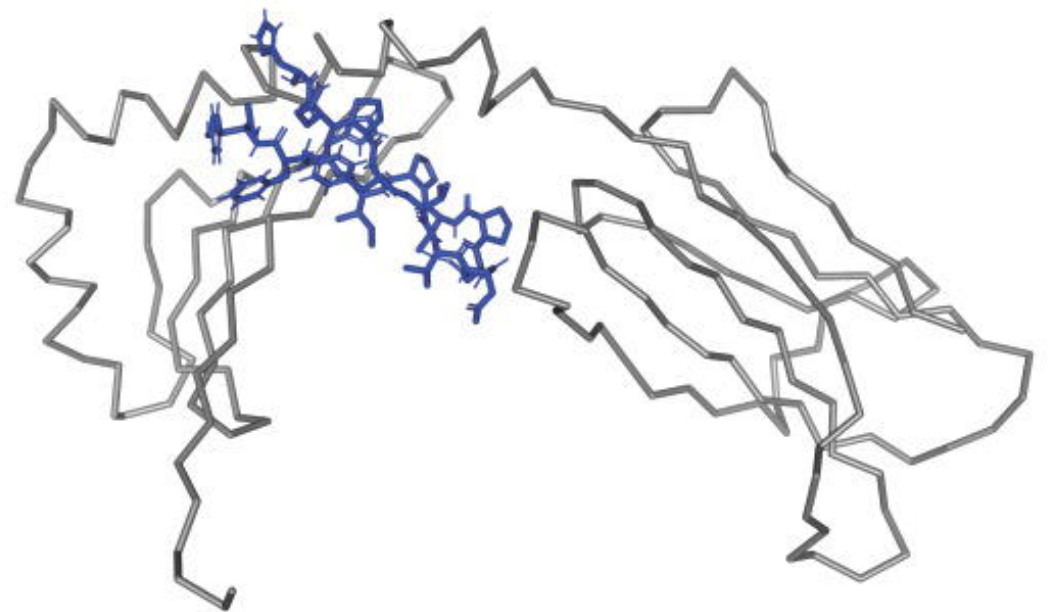

4. HQPYVDDPCPIHFY-HLA-DRB3\*01:01

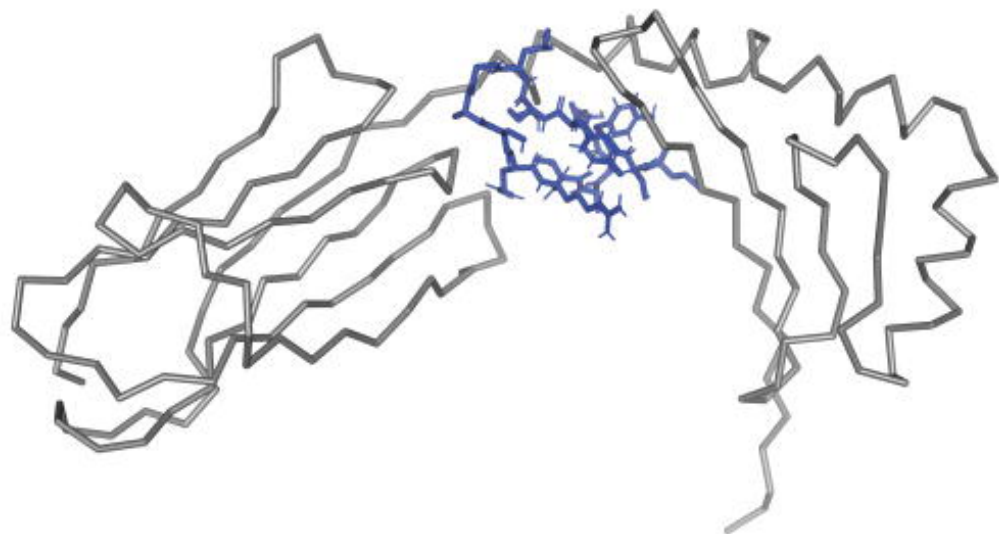

5. LSYYKLGASQRVAGD-HLA-DRB1\*09:01

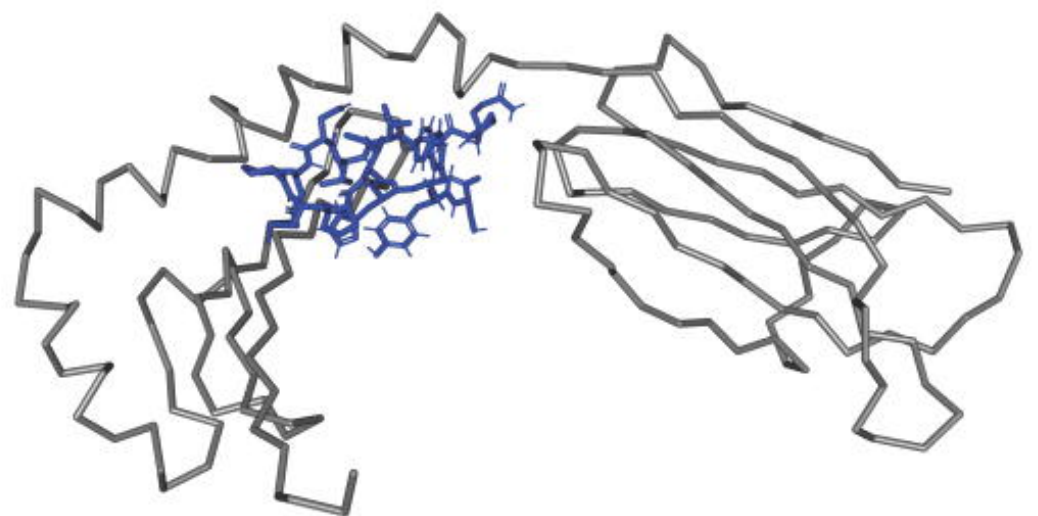

6. QPYVDDPCPIHFYS-HLA-DRB3\*01:01

## HTL epitopes - HLA Class II allele complexes



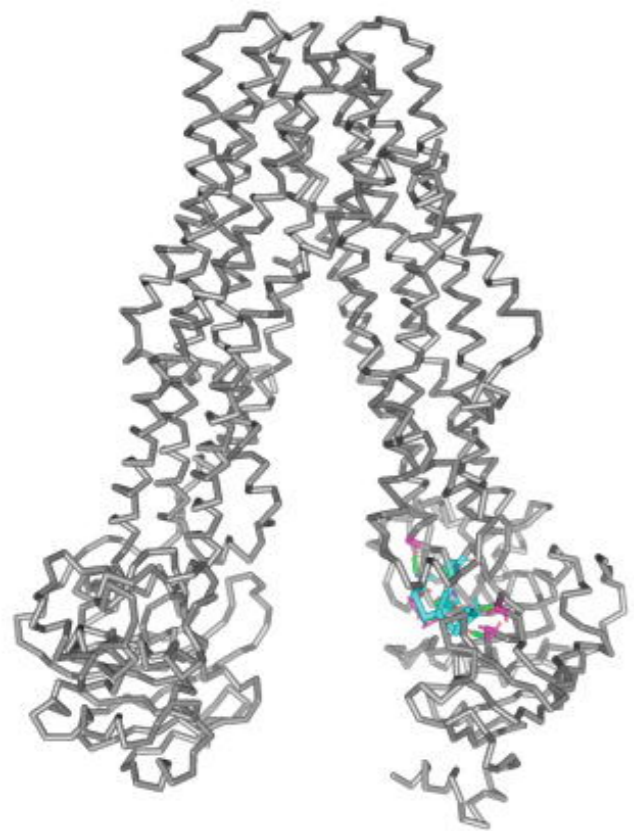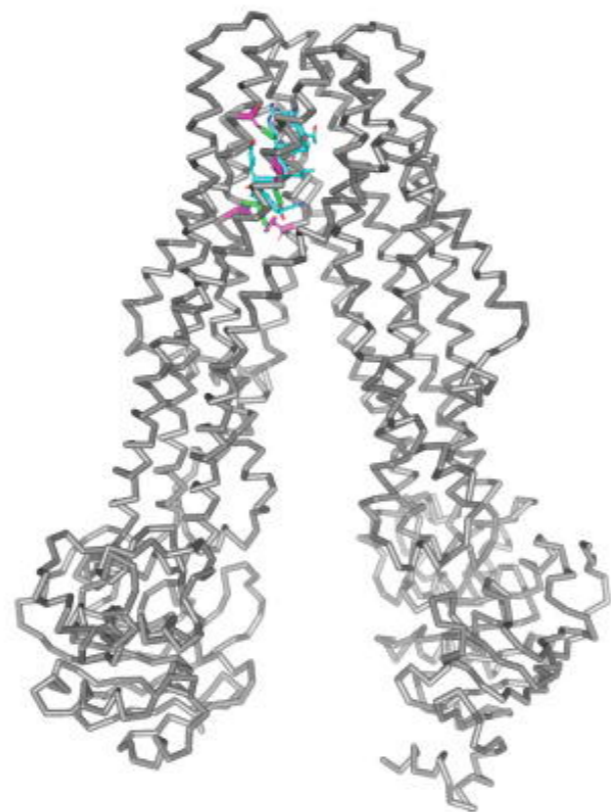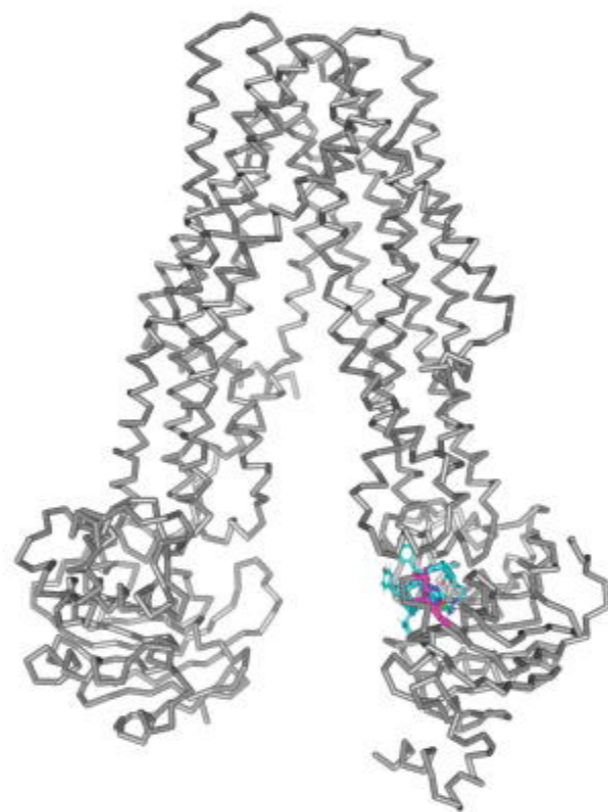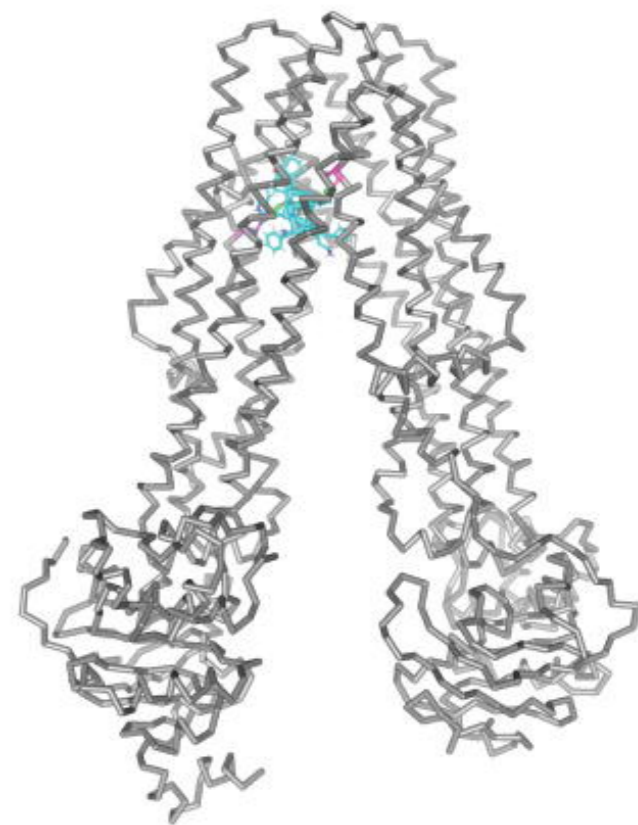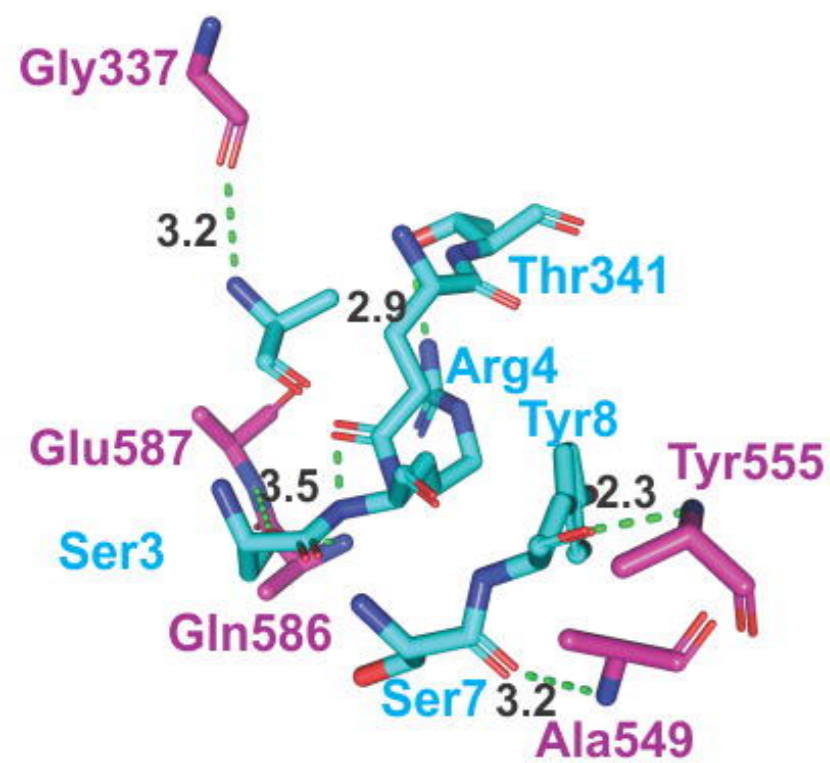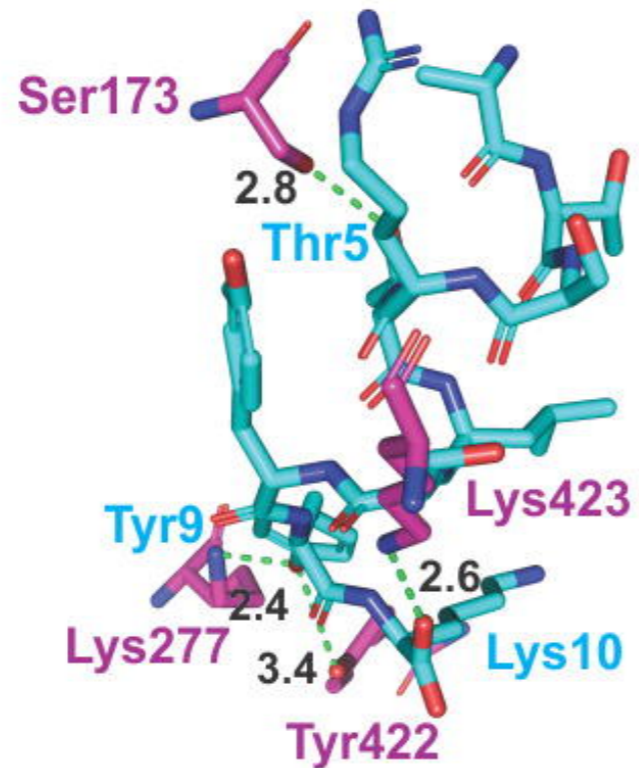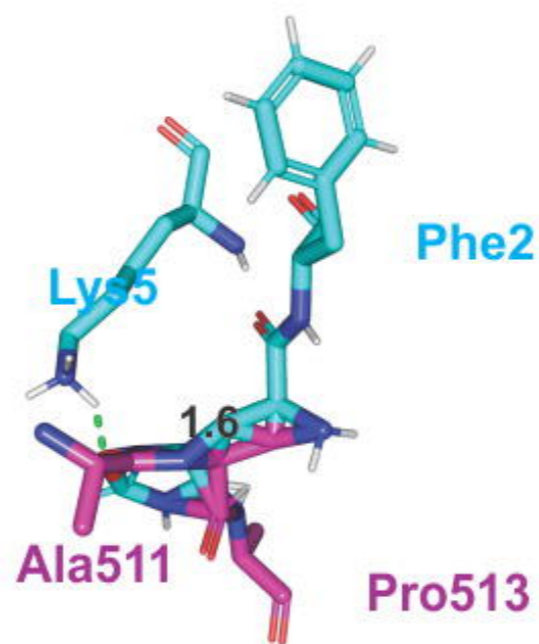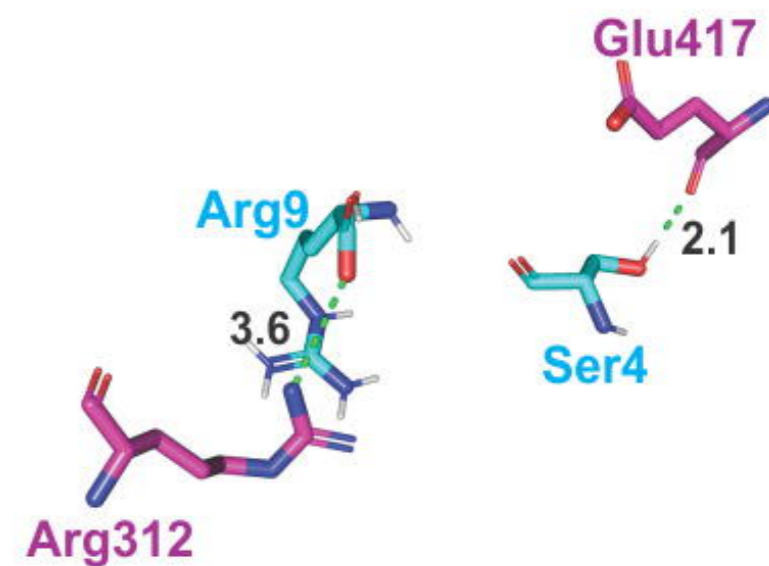

Epitope ATSRTLSYYK through TAP cavity

Epitope HFYSKWYIR through TAP cavity



bioRxiv preprint doi: <https://doi.org/10.1101/2020.04.01.019299>; this version posted April 16, 2020. The copyright holder for this preprint (which was not certified by peer review) is the author/funder. All rights reserved. No reuse allowed without permission.

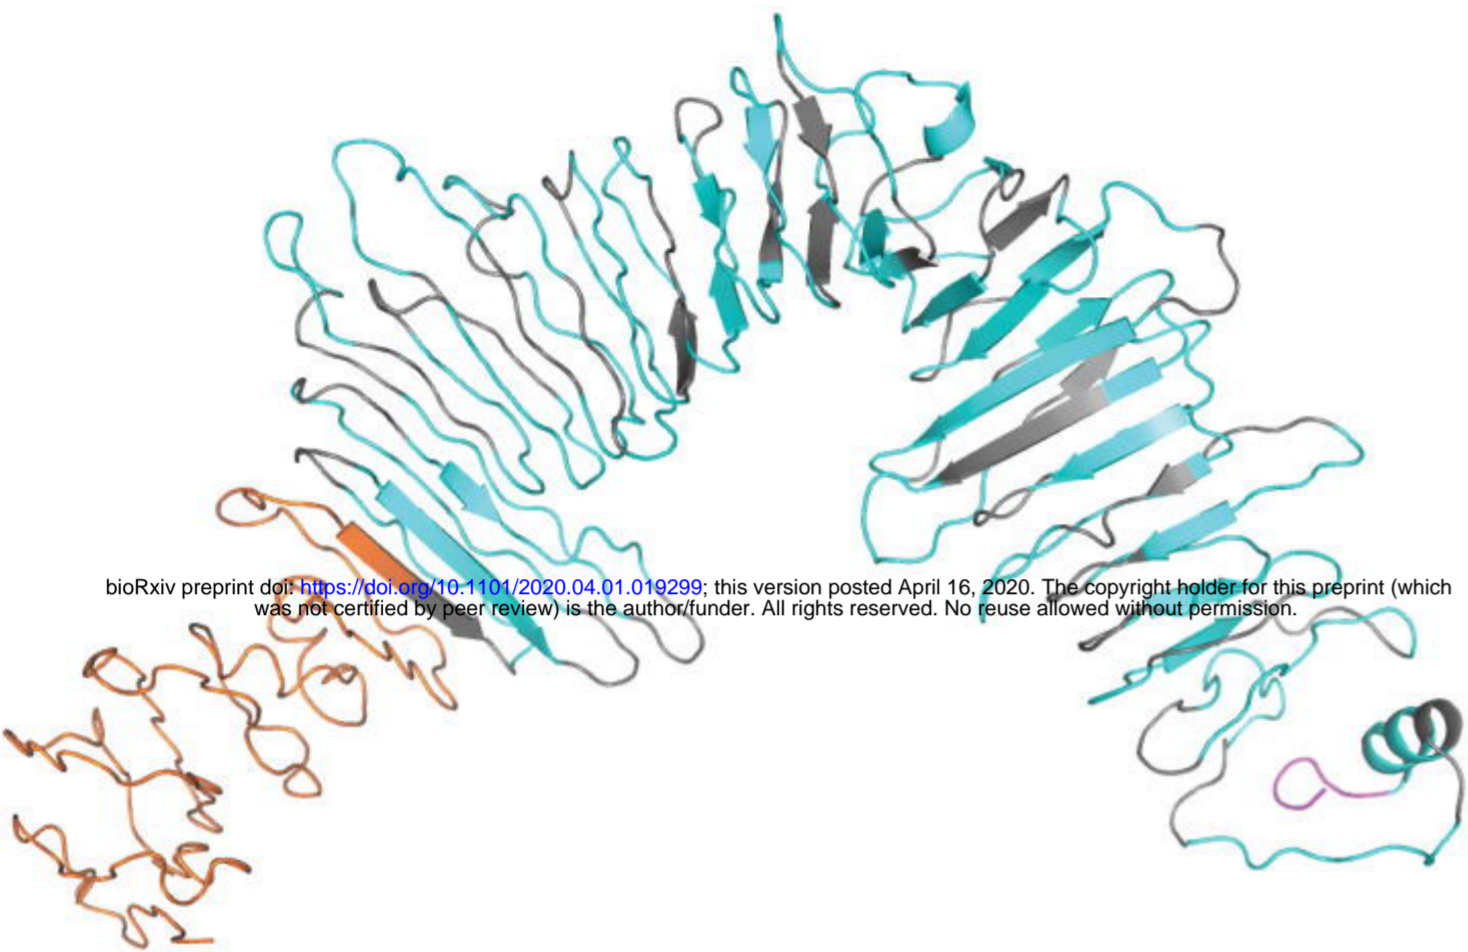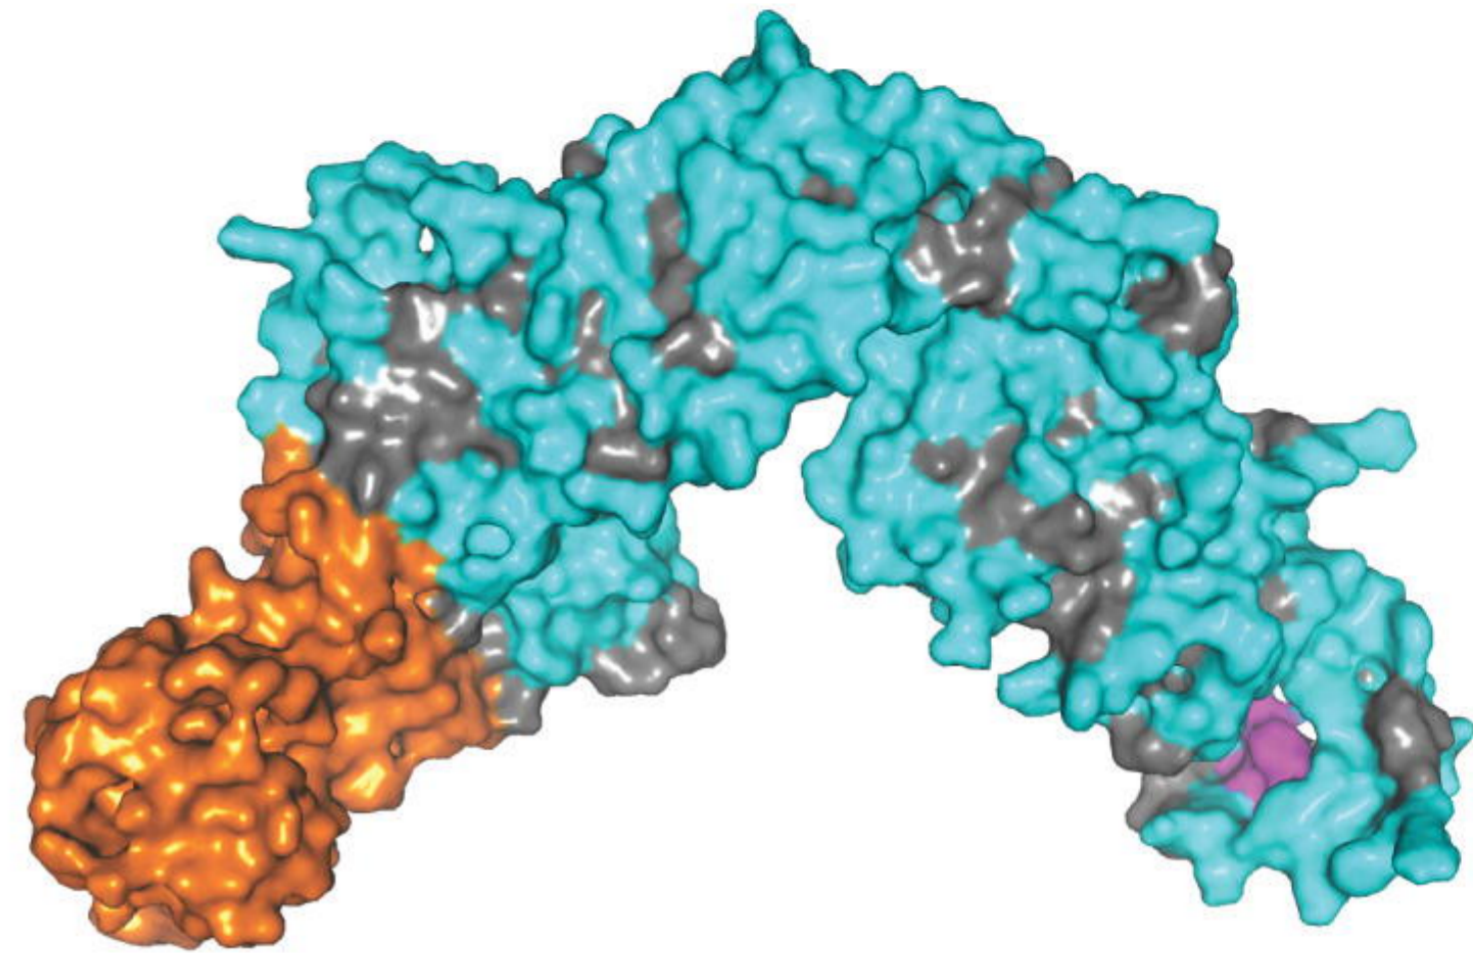

## A. CTL Multi-epitope vaccine model

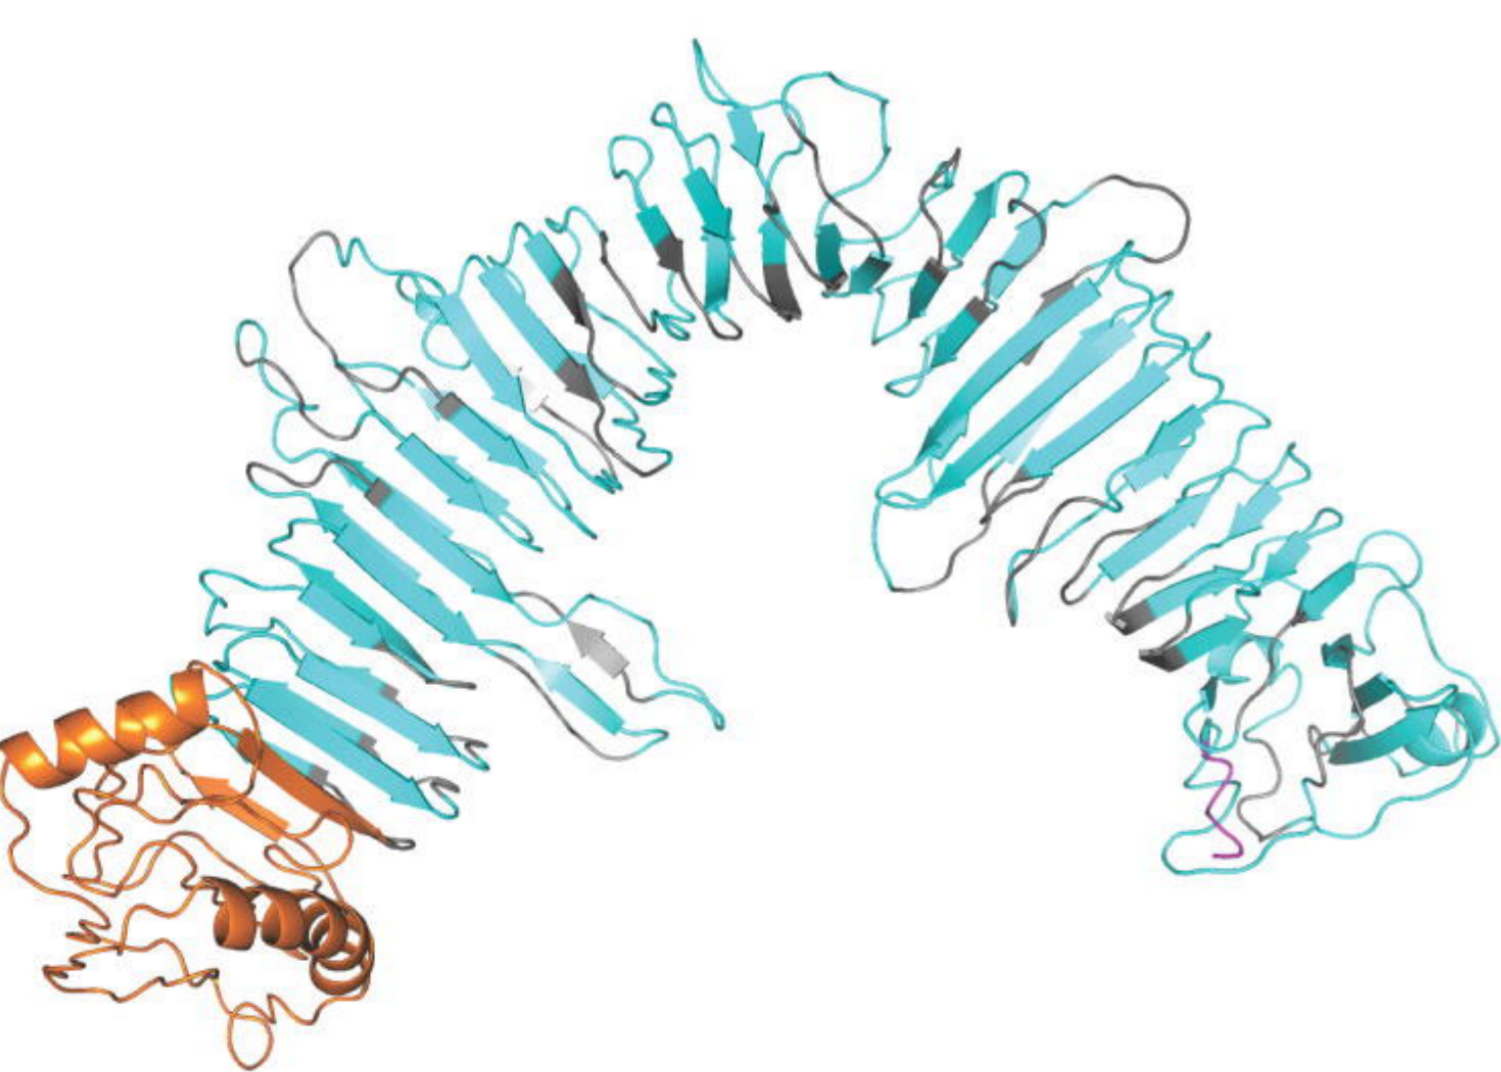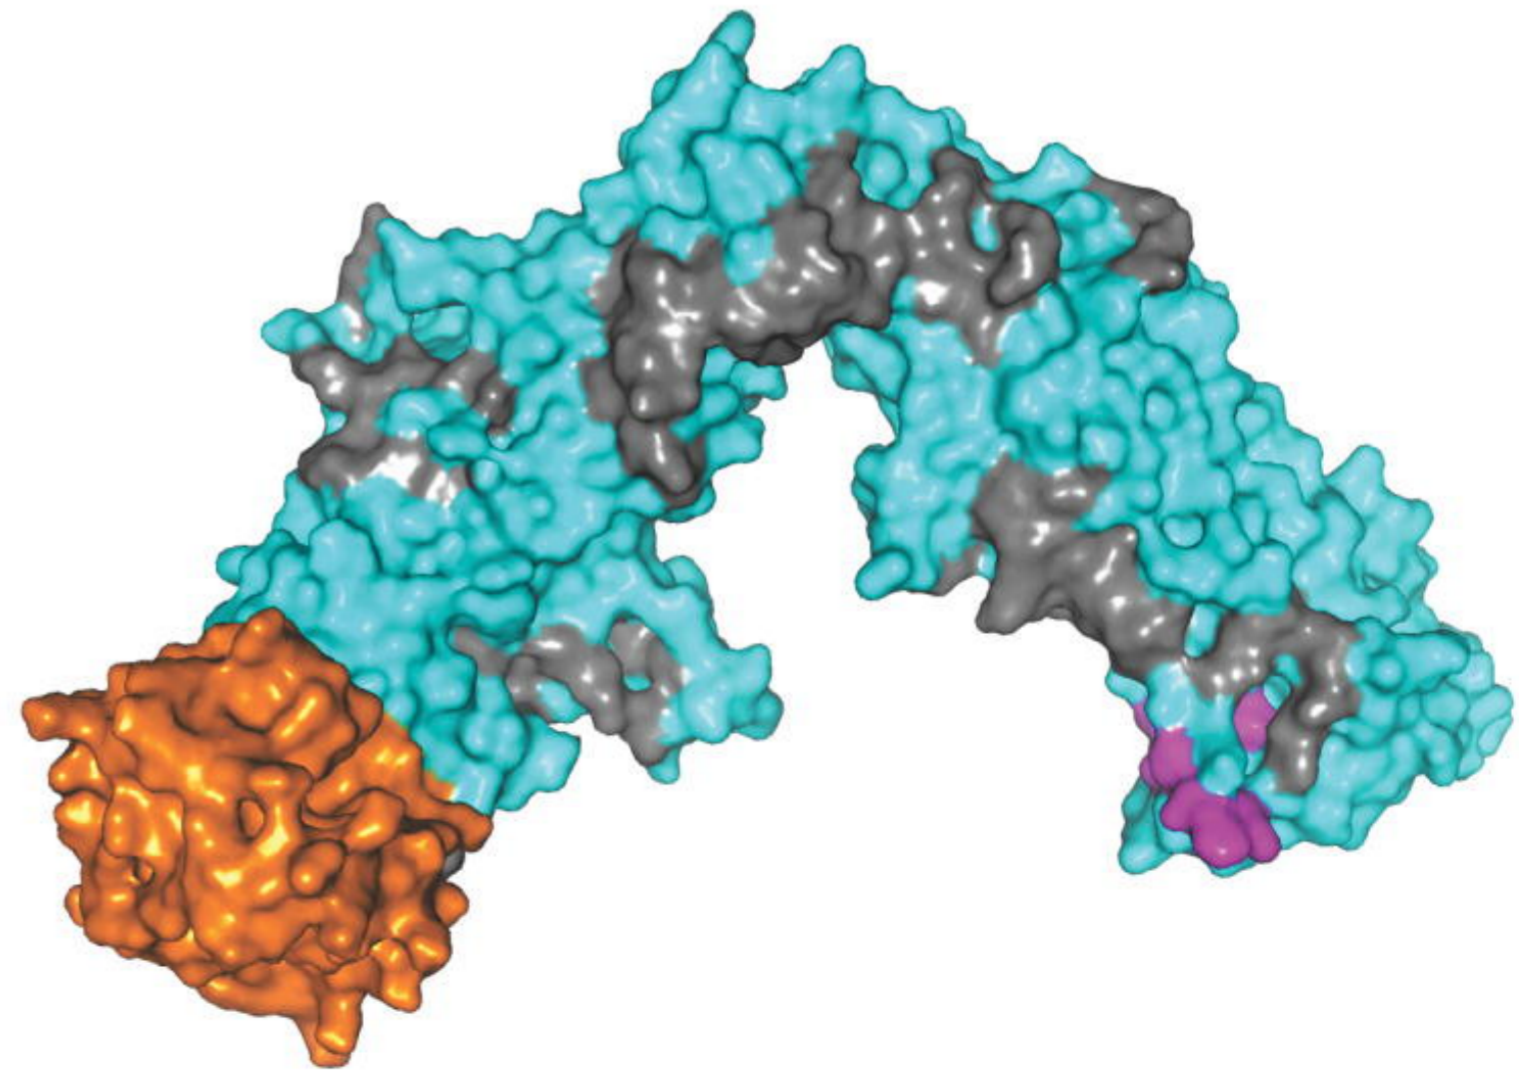

## B. HTL Multi-epitope vaccine model



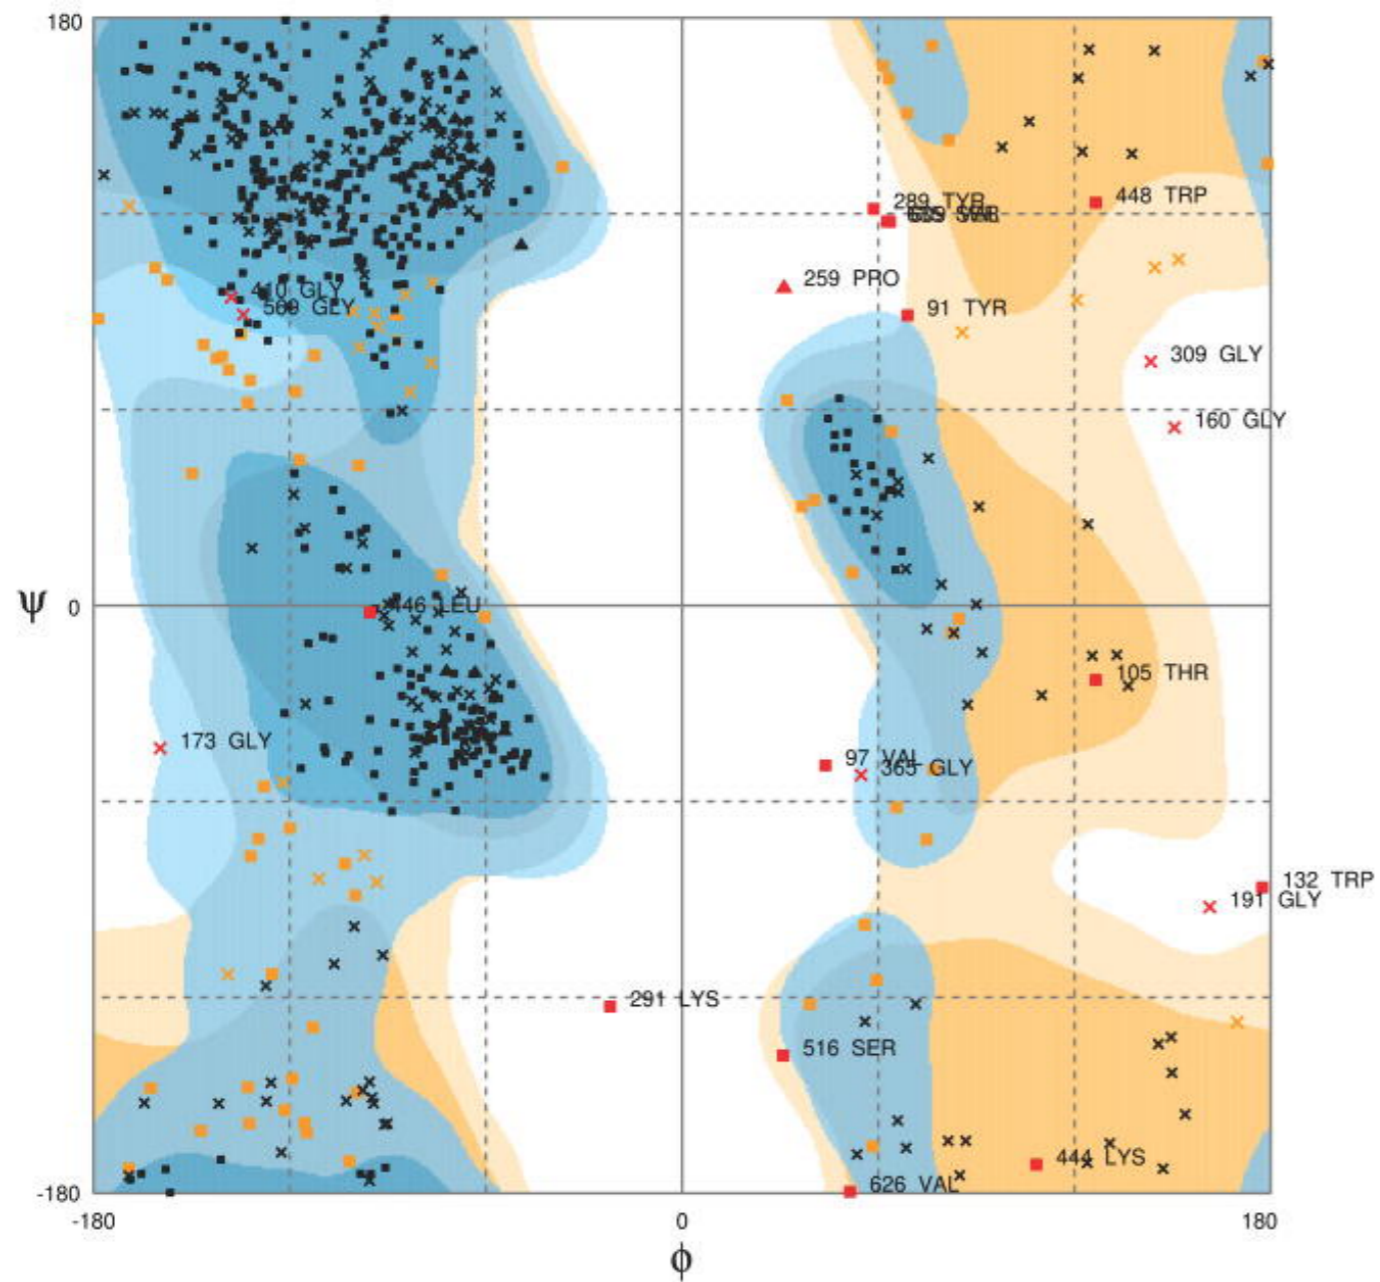

■ ▲ General/Pre-Pro/Proline Favoured    ■ ▲ General/Pre-Pro/Proline Allowed  
x Glycine Favoured    x Glycine Allowed

Number of residues in favoured region (~98.0% expected) : 602 (85.8%)  
 Number of residues in allowed region (~2.0% expected) : 79 (11.3%)  
 Number of residues in outlier region : 21 (3.0%)

**A. CTL Multi-epitope vaccine RAMPAGE analysis**

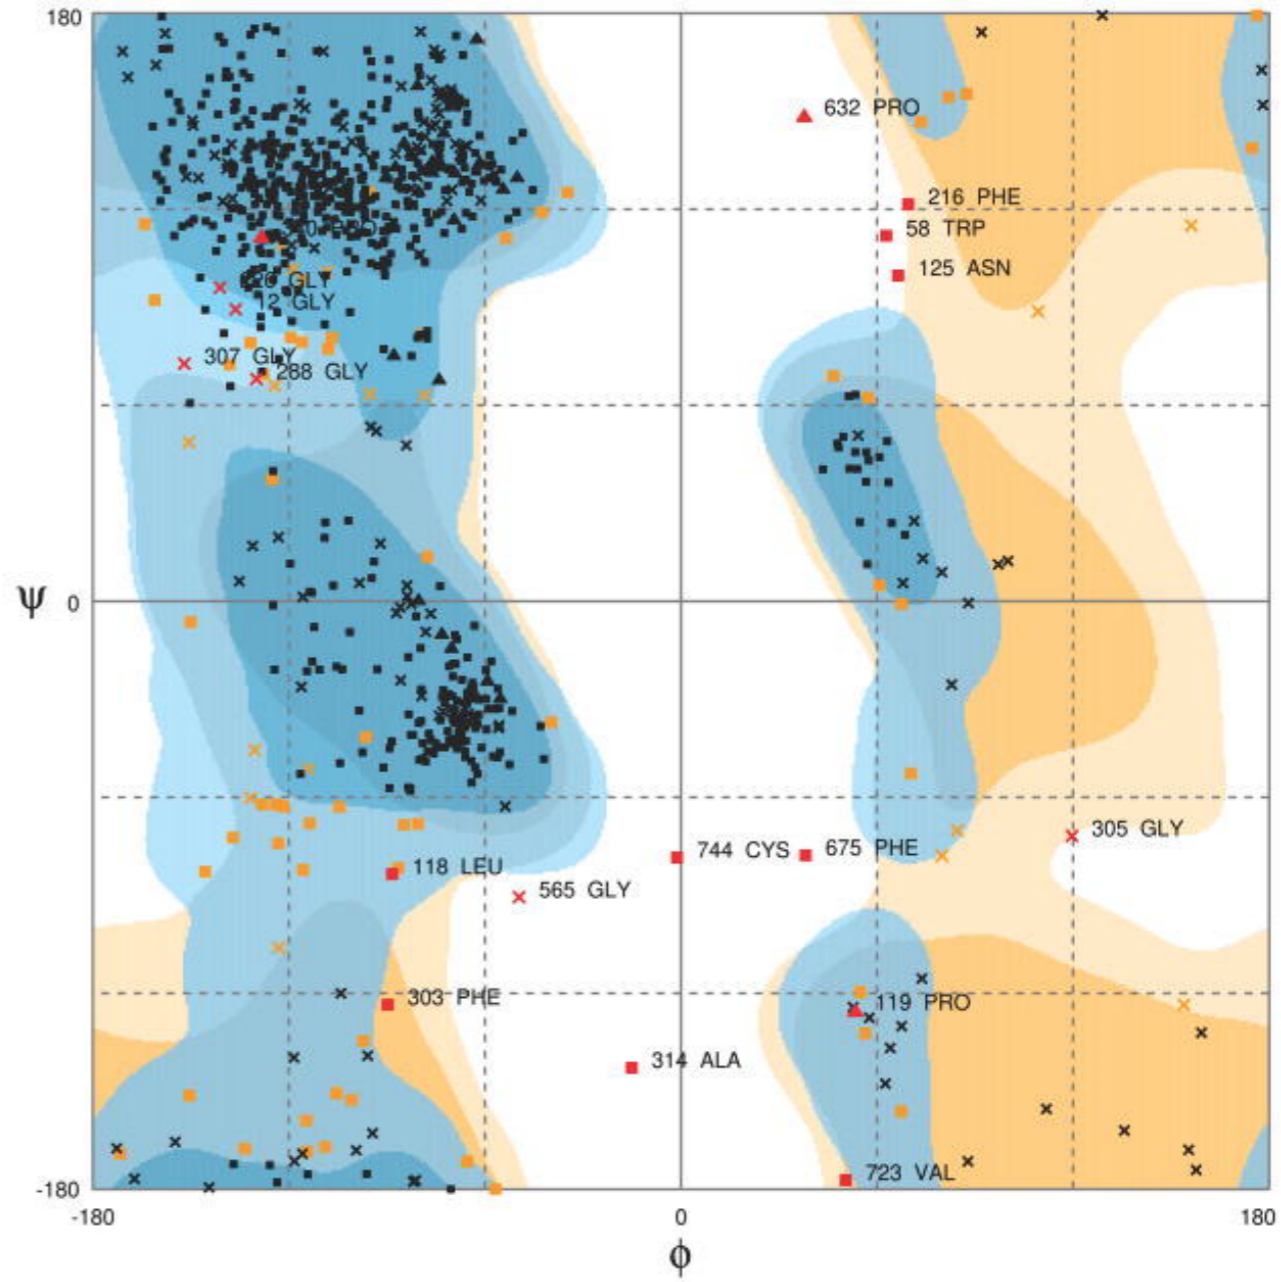

■ ▲ General/Pre-Pro/Proline Favoured    ■ ▲ General/Pre-Pro/Proline Allowed  
x Glycine Favoured    x Glycine Allowed

Number of residues in favoured region (~98.0% expected) : 718 (88.9%)  
 Number of residues in allowed region (~2.0% expected) : 72 (8.9%)  
 Number of residues in outlier region : 18 (2.2%)

**B. HTL Multi-epitope vaccine model RAMPAGE analysis**



**A.**

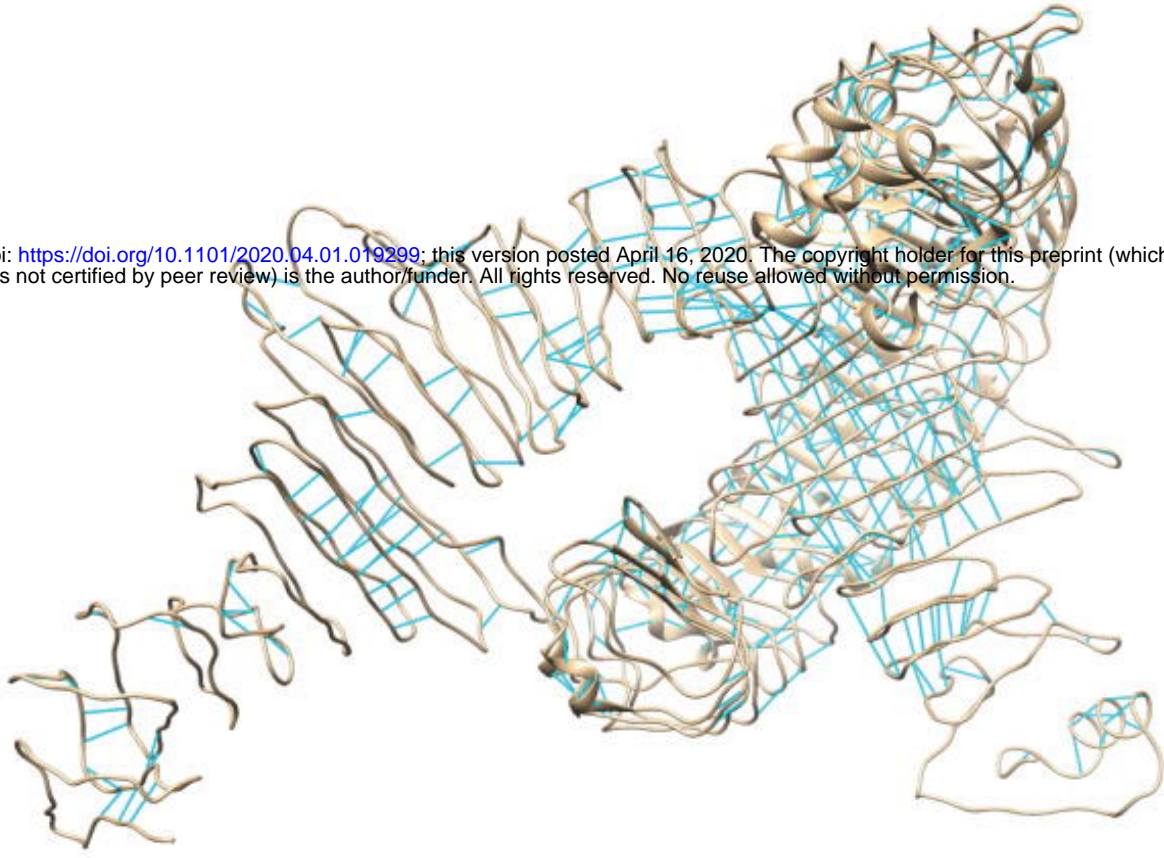

**B.**

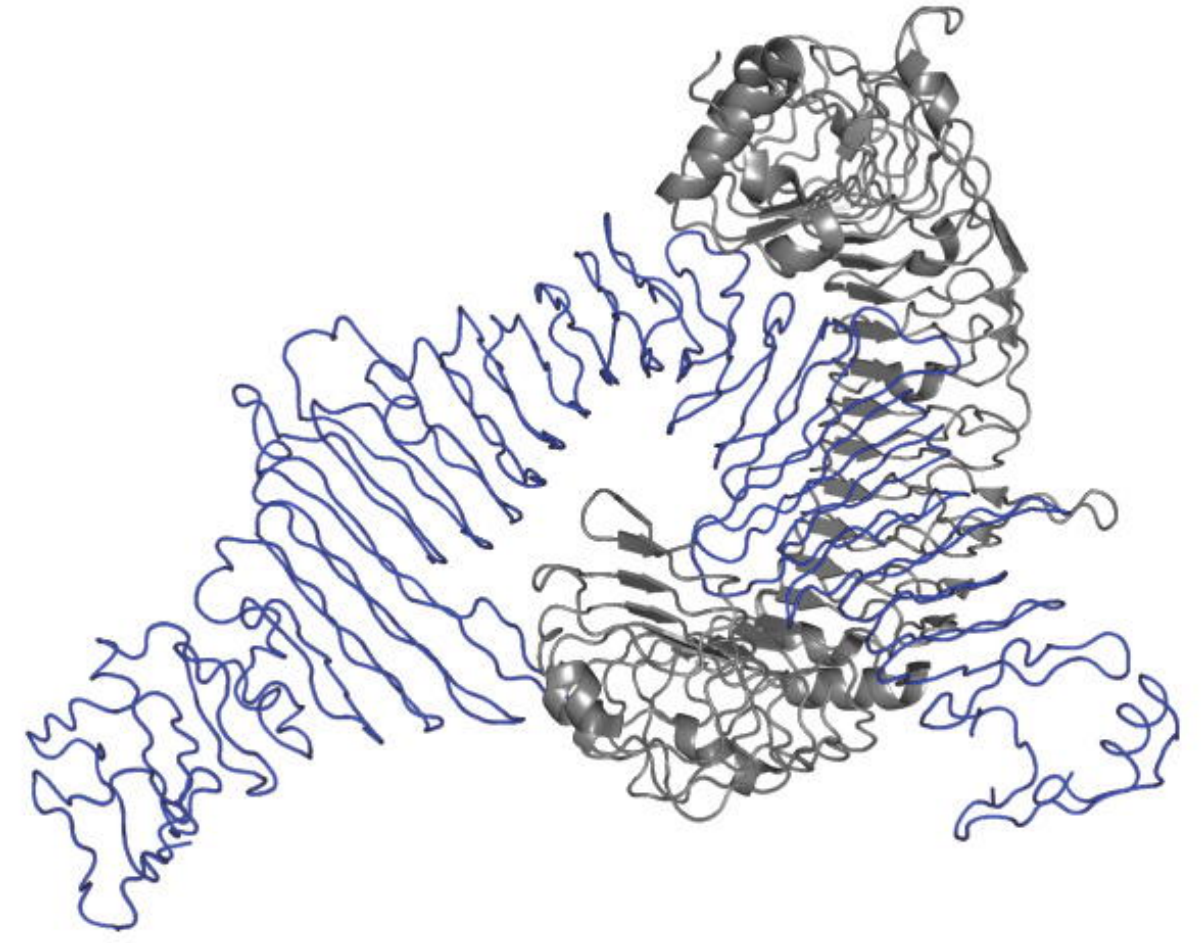

## CTL Multi-epitope vaccine model in complex with TLR3

**C.**

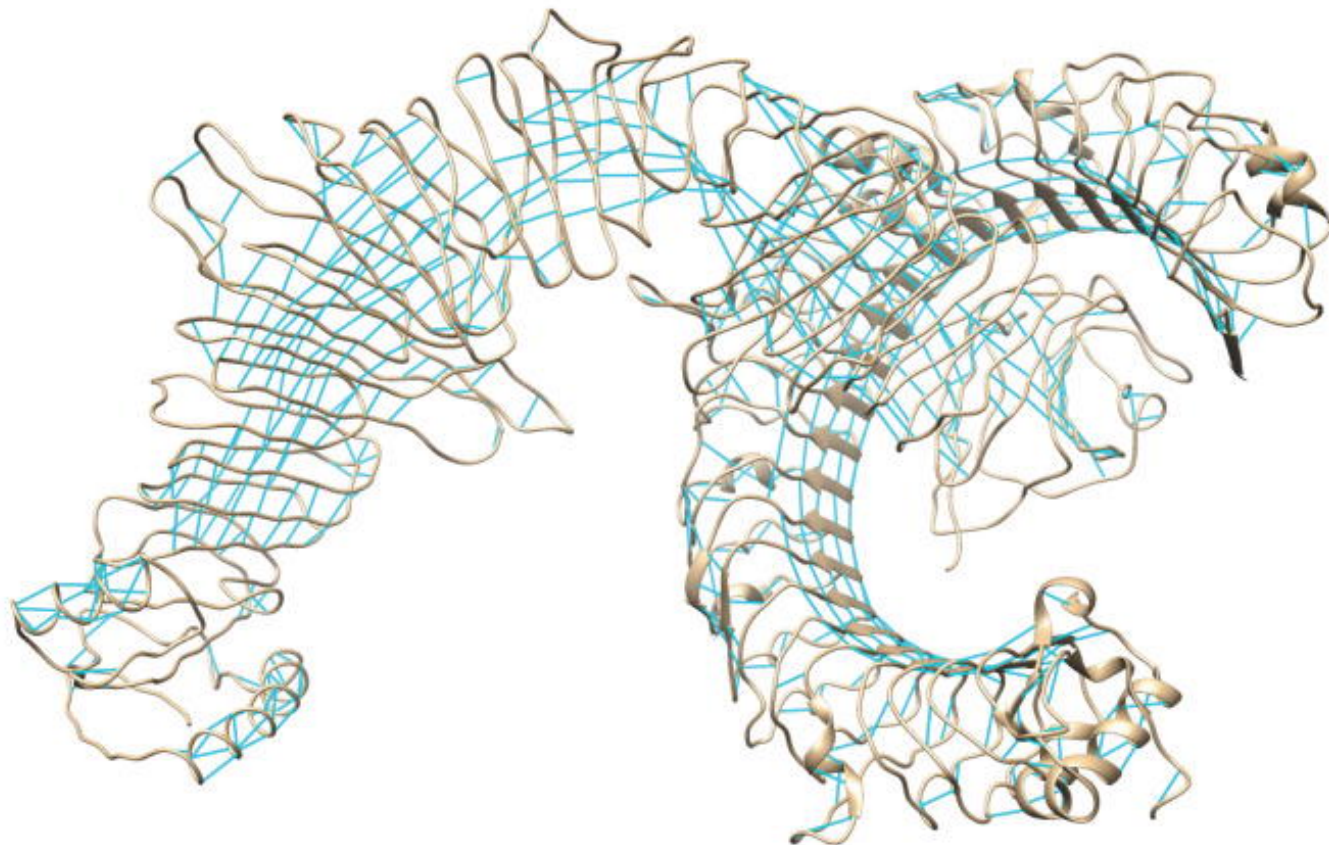

**D.**

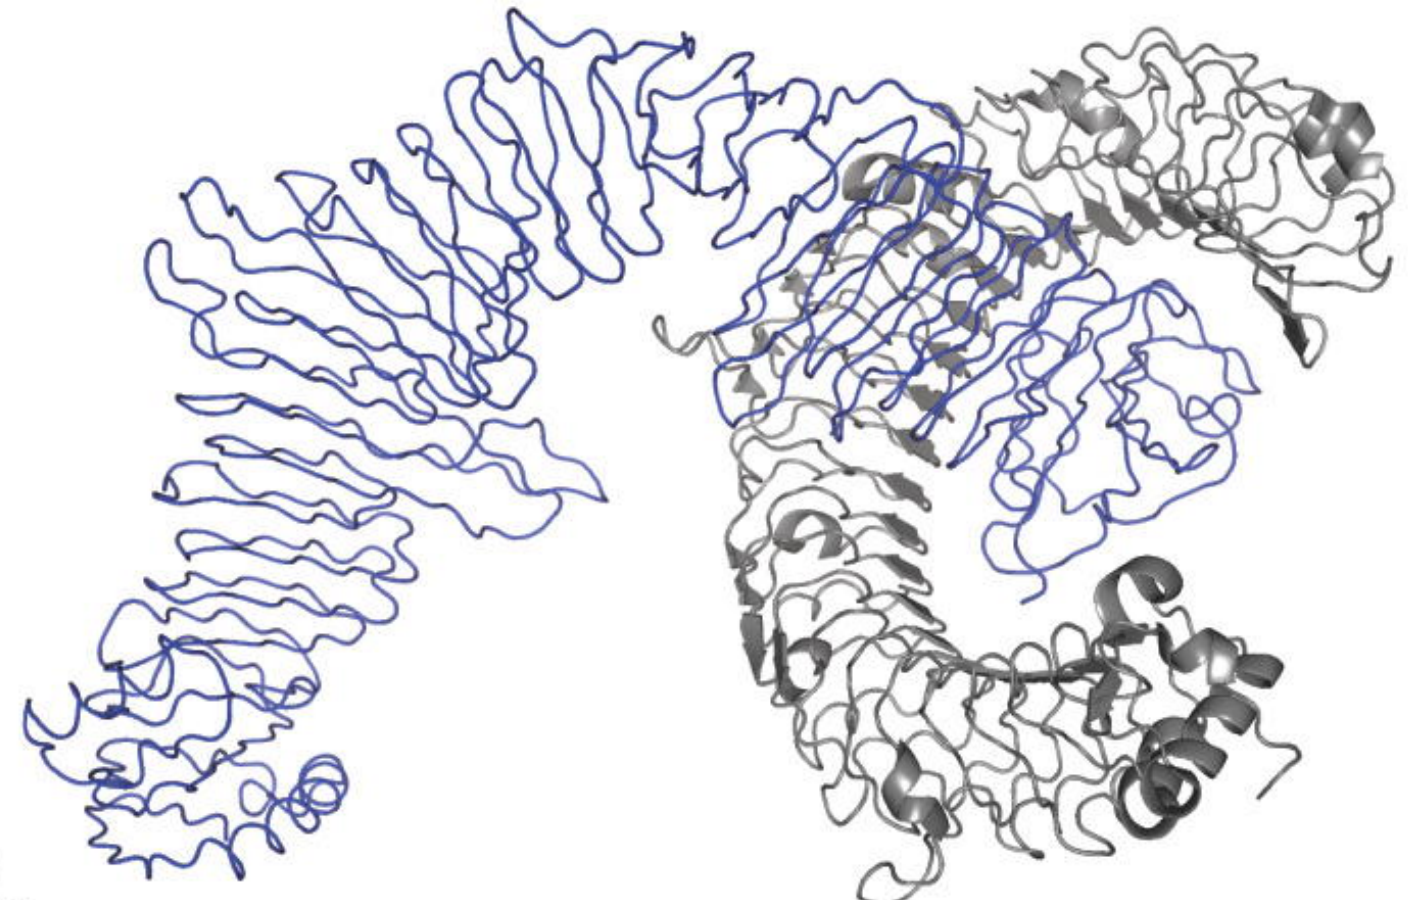

## HTL Multi-epitope vaccine model in complex with TLR3



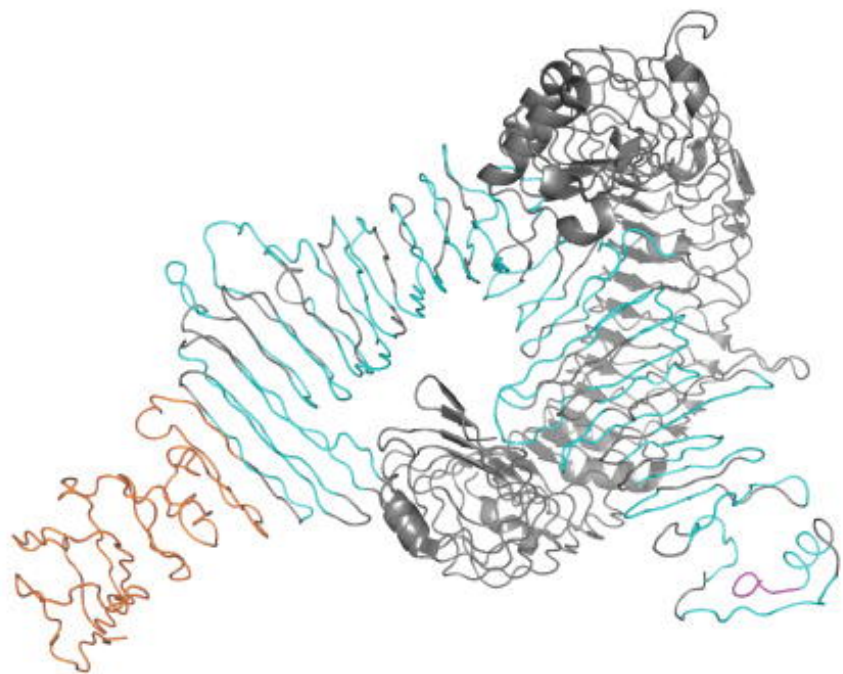

**CTL Multi-epitope COVID19 vaccine  
- Toll Like Receptor 3 complex**

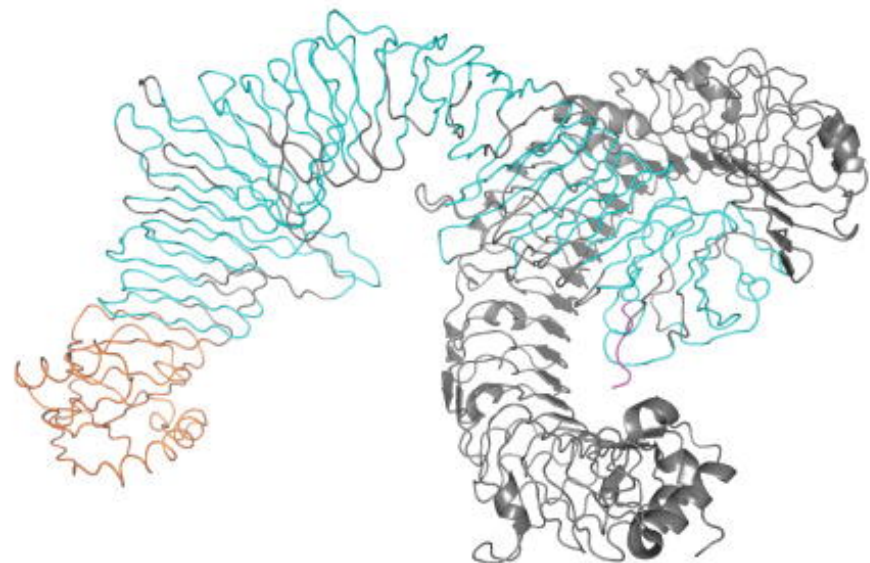

**HTL Multi-epitope COVID19 vaccine  
- Toll Like Receptor 3 complex**



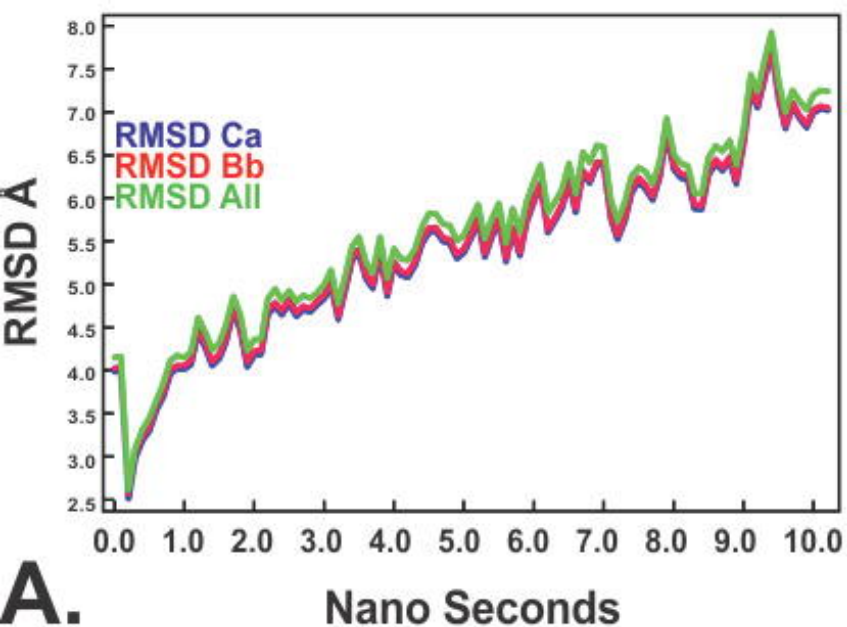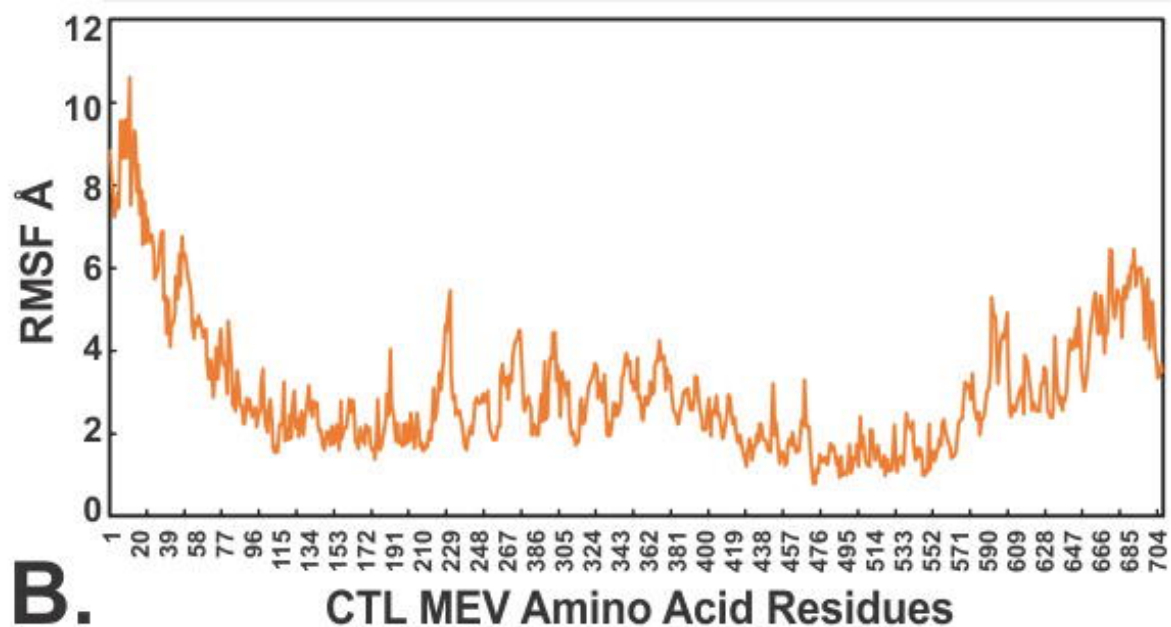

CTL Multi-epitope COVID19 vaccine - Toll Like Receptor 3 complex

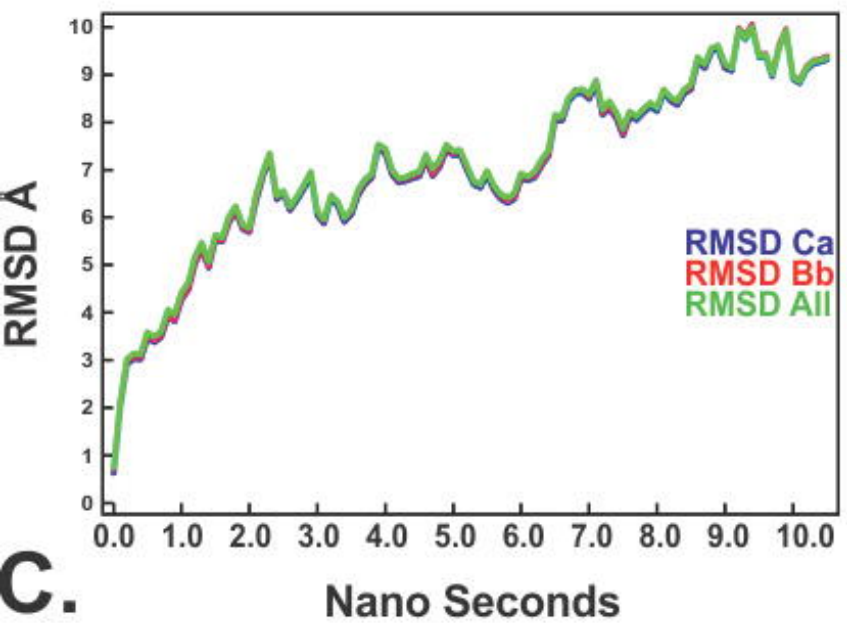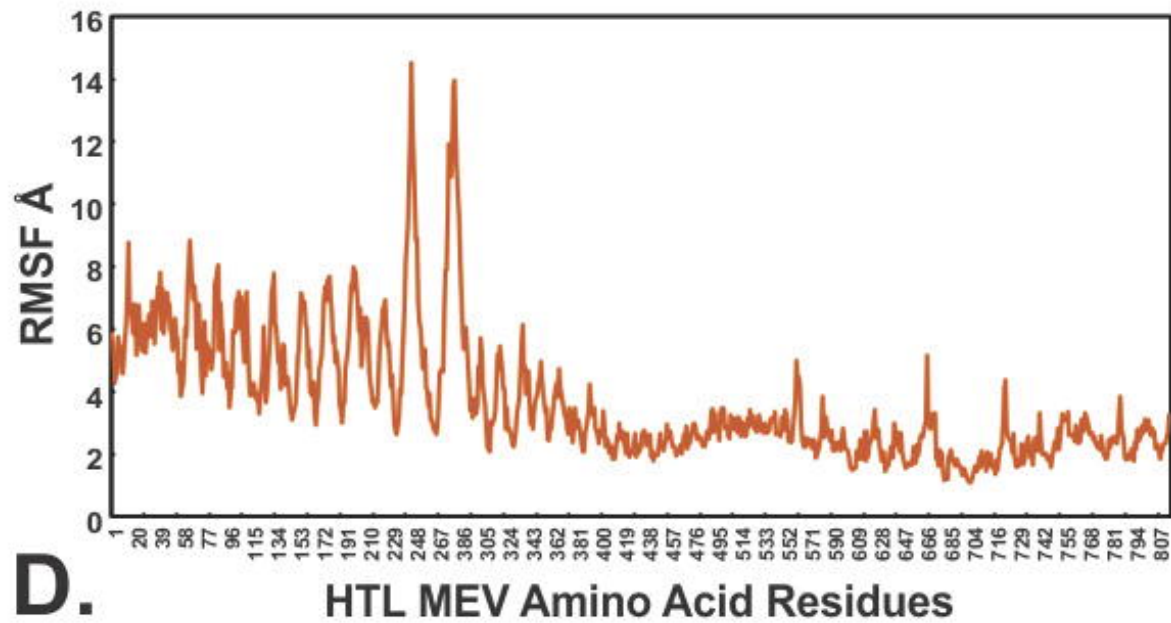

HTL Multi-epitope COVID19 vaccine - Toll Like Receptor 3 complex
